# Supplementary material for: Reproducible Research Practices and Transparency across the Biomedical Literature
Source: PubMed Central journal article supplement (PMC4699702; doi:10.1371/journal.pbio.1002333), 2016-01-04
Supplement: pbio.1002333.s003.pdf [file pbio.1002333.s003.pdf]

- 1 A1. Erratum. Trends in cognitive sciences. 2001;5(3):134. PubMed PMID:  
2 11239814.
- 3 A2. Health disparities of coal miners and coal mining communities: the role of  
4 occupational health nurses. AAOHN journal : official journal of the  
5 American Association of Occupational Health Nurses. 2011;59(7):322. doi:  
6 10.3928/08910162-20110624-21. PubMed PMID: 24601975.
- 7 A3. Semaphorin 3A and its role in osteoprotection. BoneKEy reports.  
8 2012;1:156. doi: 10.1038/bonekey.2012.156. PubMed PMID: 23951529;  
9 PubMed Central PMCID: PMC3727783.
- 10 A4. 2014 Scientific Session of the Society of American Gastrointestinal and  
11 Endoscopic Surgeons (SAGES), Salt Lake City, Utah, USA, 2-5 April 2014  
12 : Posters of Distinction. Surgical endoscopy. 2014;28 Suppl 1:304-10. doi:  
13 10.1007/s00464-014-3477-y. PubMed PMID: 24609705.
- 14 A5. Abdel-Haq NM, Harahsheh A, Asmar BL. Retropharyngeal abscess in  
15 children: the emerging role of group A beta hemolytic streptococcus.  
16 Southern medical journal. 2006;99(9):927-31. PubMed PMID: 17004526.
- 17 A6. Abdo AA. Clinical presentation, response to therapy, and predictors of  
18 fibrosis in patients with autoimmune hepatitis in Saudi Arabia. Saudi  
19 journal of gastroenterology : official journal of the Saudi Gastroenterology  
20 Association. 2006;12(2):73-6. PubMed PMID: 19858589.
- 21 A7. Abe H, Kumamoto K, Hoshino M, Utsumi Y, Takenoshita S, Kaneko F.  
22 Pericostal tuberculosis diagnosed by fine needle aspiration biopsy: report

- 23 of a case with a review of the literature. The Journal of dermatology.  
24 2005;32(1):52-7. PubMed PMID: 15841663.
- 25 A8. Agrawal AM, Neau SH, Bonate PL. Wet granulation fine particle  
26 ethylcellulose tablets: effect of production variables and mathematical  
27 modeling of drug release. AAPS pharmSci. 2003;5(2):E13. doi:  
28 10.1208/ps050213. PubMed PMID: 12866940; PubMed Central PMCID:  
29 PMC2751521.
- 30 A9. Ahrendt HJ, Adolf D, Buhling KJ. Advantages and challenges of  
31 oestrogen-free hormonal contraception. Current medical research and  
32 opinion. 2010;26(8):1947-55. doi: 10.1185/03007995.2010.493088.  
33 PubMed PMID: 20569066.
- 34 A10. Aiken AH, Chang SM, Larson D, Butowski N, Cha S. Longitudinal  
35 magnetic resonance imaging features of glioblastoma multiforme treated  
36 with radiotherapy with or without brachytherapy. International journal of  
37 radiation oncology, biology, physics. 2008;72(5):1340-6. doi:  
38 10.1016/j.ijrobp.2008.02.078. PubMed PMID: 18538496.
- 39 A11. Akagi I, Miyashita M, Ishibashi O, Mishima T, Kikuchi K, Makino H, et al.  
40 Relationship between altered expression levels of MIR21, MIR143,  
41 MIR145, and MIR205 and clinicopathologic features of esophageal  
42 squamous cell carcinoma. Diseases of the esophagus : official journal of  
43 the International Society for Diseases of the Esophagus / ISDE.  
44 2011;24(7):523-30. doi: 10.1111/j.1442-2050.2011.01177.x. PubMed  
45 PMID: 21453382.

- 46 A12. Akazawa M, Sindelar JL, Paltiel AD. Economic costs of influenza-related  
47 work absenteeism. *Value in health : the journal of the International Society*  
48 *for Pharmacoeconomics and Outcomes Research*. 2003;6(2):107-15. doi:  
49 10.1046/j.1524-4733.2003.00209.x. PubMed PMID: 12641861.
- 50 A13. Akbar B, Niloufar N, Abolfazl M, Lofollah S, Ali KQ, Soheyla V. Evaluation  
51 and comparison of zinc absorption level from 2-Alkyle 3-Hydroxy pyranon-  
52 zinc complexes and zinc sulfate in rat in vivo. *Advanced biomedical*  
53 *research*. 2013;2:77. doi: 10.4103/2277-9175.116432. PubMed PMID:  
54 24223392; PubMed Central PMCID: PMC3814584.
- 55 A14. Al Quran FA, Al-Dwairi ZN. Torus palatinus and torus mandibularis in  
56 edentulous patients. *The journal of contemporary dental practice*.  
57 2006;7(2):112-9. PubMed PMID: 16685302.
- 58 A15. Alava JJ, Calle N. Drilling plans endanger Yasuni's biodiversity. *Science*.  
59 2013;342(6161):931-2. doi: 10.1126/science.342.6161.931-a. PubMed  
60 PMID: 24264977.
- 61 A16. Albuquerque AV, Drumond AL, Shao S, Melo RC, Almeida FR, Meistrich  
62 ML, et al. A New Approach for Optimal Morphological Identification and  
63 Immunolabeling of Spermatogonial Cells. *Microscopy and microanalysis :  
64 the official journal of Microscopy Society of America, Microbeam Analysis  
65 Society, Microscopical Society of Canada*. 2014:1-8. doi:  
66 10.1017/S1431927614000889. PubMed PMID: 24834474.
- 67 A17. Alvarado G, D'Andrea LA. Why do people snore? *Scientific American*.  
68 2004;291(1):120. PubMed PMID: 15255597.

- 69 A18. Ambroz KL, Zhang Y, Schutz-Geschwender A, Olive DM. Blocking and  
70 detection chemistries affect antibody performance on reverse phase  
71 protein arrays. *Proteomics*. 2008;8(12):2379-83. doi:  
72 10.1002/pmic.200700676. PubMed PMID: 18563731.
- 73 A19. American Diabetes A. Screening for type 2 diabetes. *Diabetes care*.  
74 2003;26 Suppl 1:S21-4. PubMed PMID: 12502615.
- 75 A20. Androutsos G. Leon Berard (1870-1956): creator of the homonymous  
76 anticancer center of Lyon. *Journal of BUON : official journal of the Balkan  
77 Union of Oncology*. 2006;11(2):245-50. PubMed PMID: 17318980.
- 78 A21. Angelico M, Gridelli B, Strazzabosco M, Transplantation AISFCoL.  
79 Practice of adult liver transplantation in Italy. Recommendations of the  
80 Italian Association for the Study of the Liver (A.I.S.F.). *Digestive and liver  
81 disease : official journal of the Italian Society of Gastroenterology and the  
82 Italian Association for the Study of the Liver*. 2005;37(7):461-7. doi:  
83 10.1016/j.dld.2005.03.006. PubMed PMID: 15893508.
- 84 A22. Antunes FM, Malmierca MS. An Overview of Stimulus-Specific Adaptation  
85 in the Auditory Thalamus. *Brain topography*. 2013. doi: 10.1007/s10548-  
86 013-0342-6. PubMed PMID: 24343247.
- 87 A23. Aras R. Social marketing in healthcare. *The Australasian medical journal*.  
88 2011;4(8):418-A24. doi: 10.4066/AMJ.2011.626. PubMed PMID:  
89 23393528; PubMed Central PMCID: PMC3562881.

- 90 A24. Arbib MA. From grasp to language: embodied concepts and the challenge  
91 of abstraction. *Journal of physiology, Paris*. 2008;102(1-3):4-20. doi:  
92 10.1016/j.jphysparis.2008.03.001. PubMed PMID: 18440207.
- 93 A25. Argaw AT, Gurfein BT, Zhang Y, Zameer A, John GR. VEGF-mediated  
94 disruption of endothelial CLN-5 promotes blood-brain barrier breakdown.  
95 *Proceedings of the National Academy of Sciences of the United States of*  
96 *America*. 2009;106(6):1977-82. doi: 10.1073/pnas.0808698106. PubMed  
97 PMID: 19174516; PubMed Central PMCID: PMC2644149.
- 98 A26. Asano R, Nagami A, Fukumoto Y, Miura K, Yazama F, Ito H, et al.  
99 Synthesis and biological evaluation of new boron-containing chlorin  
100 derivatives as agents for both photodynamic therapy and boron neutron  
101 capture therapy of cancer. *Bioorganic & medicinal chemistry letters*.  
102 2014;24(5):1339-43. doi: 10.1016/j.bmcl.2014.01.054. PubMed PMID:  
103 24508130.
- 104 A27. Astachov L, Nevo Z, Brosh T, Vago R. The structural, compositional and  
105 mechanical features of the calcite shell of the barnacle *Tetraclita*  
106 *rufotincta*. *Journal of structural biology*. 2011;175(3):311-8. doi:  
107 10.1016/j.jsb.2011.04.014. PubMed PMID: 21549194.
- 108 A28. Audelin MC, Savage PD, Ades PA. Changing clinical profile of patients  
109 entering cardiac rehabilitation/secondary prevention programs: 1996 to  
110 2006. *Journal of cardiopulmonary rehabilitation and prevention*.  
111 2008;28(5):299-306. doi: 10.1097/01.HCR.0000336139.48698.26.  
112 PubMed PMID: 18784538.

- 113 A29. Avendano-Garcia M, Mercado U, Marin ME. A case of Peutz-Jeghers  
114 syndrome associated with duodenal carcinoma and sickle cell anemia.  
115 The American journal of gastroenterology. 2002;97(3):762-3. doi:  
116 10.1111/j.1572-0241.2002.05569.x. PubMed PMID: 11922580.
- 117 A30. Awofala AA, Davies JA, Jones S. Functional roles for redox genes in  
118 ethanol sensitivity in Drosophila. Functional & integrative genomics.  
119 2012;12(2):305-15. doi: 10.1007/s10142-012-0272-5. PubMed PMID:  
120 22430022.
- 121 A31. Azaroff LS, Levenstein C, Wegman DH. Occupational health of Southeast  
122 Asian immigrants in a US city: a comparison of data sources. American  
123 journal of public health. 2003;93(4):593-8. PubMed PMID: 12660203;  
124 PubMed Central PMCID: PMC1447796.
- 125 A32. Azuma T, Takahashi S, Kawamura A. Preoperative autologous blood  
126 donation in hip surgeries. Transfusion science. 2000;23(3):177-81.  
127 PubMed PMID: 11099892.
- 128 A33. Bachelet D, Truong T, Verner MA, Arveux P, Kerbrat P, Charlier C, et al.  
129 Determinants of serum concentrations of 1,1-dichloro-2,2-bis(p-  
130 chlorophenyl)ethylene and polychlorinated biphenyls among French  
131 women in the CECILE study. Environmental research. 2011;111(6):861-  
132 70. doi: 10.1016/j.envres.2011.06.001. PubMed PMID: 21684540.
- 133 A34. Bacon JL, Patterson CM, Madden BP. Indications and interventional  
134 options for non-resectable tracheal stenosis. Journal of thoracic disease.

135 2014;6(3):258-70. doi: 10.3978/j.issn.2072-1439.2013.11.08. PubMed  
136 PMID: 24624290; PubMed Central PMCID: PMC3949180.

137 A35. Badireddy AR, Budarz JF, Chellam S, Wiesner MR. Bacteriophage  
138 inactivation by UV-A illuminated fullerenes: role of nanoparticle-virus  
139 association and biological targets. *Environmental science & technology*.  
140 2012;46(11):5963-70. doi: 10.1021/es300340u. PubMed PMID: 22545948.

141 A36. Baker JM, Good DE. Physiological emotional under-arousal in individuals  
142 with mild head injury. *Brain injury : [BI]*. 2014;28(1):51-65. doi:  
143 10.3109/02699052.2013.857787. PubMed PMID: 24328800.

144 A37. Bakker NA, Verschuuren EA, Veeger NJ, van der Bij W, van Imhoff GW,  
145 Kallenberg CG, et al. Quantification of Epstein-Barr virus-DNA load in lung  
146 transplant recipients: a comparison of plasma versus whole blood. *The*  
147 *Journal of heart and lung transplantation : the official publication of the*  
148 *International Society for Heart Transplantation*. 2008;27(1):7-10. doi:  
149 10.1016/j.healun.2007.10.008. PubMed PMID: 18187080.

150 A38. Balasubramanian K, Burghard M, Kern K, Scolari M, Mews A.  
151 Photocurrent imaging of charge transport barriers in carbon nanotube  
152 devices. *Nano letters*. 2005;5(3):507-10. doi: 10.1021/nl050053k. PubMed  
153 PMID: 15755103.

154 A39. Baldessarini RJ, Tondo L. Does lithium treatment still work? Evidence of  
155 stable responses over three decades. *Archives of general psychiatry*.  
156 2000;57(2):187-90. PubMed PMID: 10665622.

- 157 A40. Ballone E, Fazii P, Lappa G, Di Mascio R, Di Mascio C, Schioppa F.  
158 Prevalence of Becker's nevi in a population of young men in central Italy.  
159 Journal of the American Academy of Dermatology. 2003;48(5):795. doi:  
160 10.1067/mjd.2003.182. PubMed PMID: 12734514.
- 161 A41. Banaschak S, Michael M. Detection of fetal DNA in a cell pellet after  
162 centrifugation of mountant. Journal of forensic sciences. 2003;48(1):135-6.  
163 PubMed PMID: 12570214.
- 164 A42. Baran PS, Maimone TJ. Organic chemistry: a tuxedo for iodine atoms.  
165 Nature. 2007;445(7130):826-7. doi: 10.1038/445826a. PubMed PMID:  
166 17314962.
- 167 A43. Barnett WS. Effectiveness of early educational intervention. Science.  
168 2011;333(6045):975-8. doi: 10.1126/science.1204534. PubMed PMID:  
169 21852490.
- 170 A44. Bartlett A, King M, Phillips P. Straight talking: an investigation of the  
171 attitudes and practice of psychoanalysts and psychotherapists in relation  
172 to gays and lesbians. The British journal of psychiatry : the journal of  
173 mental science. 2001;179:545-9. PubMed PMID: 11731360.
- 174 A45. Bax M. Does 'therapy' have a future? Developmental medicine and child  
175 neurology. 2001;43(1):3. PubMed PMID: 11201420.
- 176 A46. Begley DJ. Delivery of therapeutic agents to the central nervous system:  
177 the problems and the possibilities. Pharmacology & therapeutics.  
178 2004;104(1):29-45. doi: 10.1016/j.pharmthera.2004.08.001. PubMed  
179 PMID: 15500907.



- 180 A47. Beis LY, Polyviou T, Malkova D, Pitsiladis YP. The effects of creatine and  
181 glycerol hyperhydration on running economy in well trained endurance  
182 runners. *Journal of the International Society of Sports Nutrition*.  
183 2011;8(1):24. doi: 10.1186/1550-2783-8-24. PubMed PMID: 22176668;  
184 PubMed Central PMCID: PMC3283512.
- 185 A48. Beisse R. Endoscopic treatment of spinal trauma at the thoracolumbar  
186 junction. *Indian journal of orthopaedics*. 2007;41(4):277-85. doi:  
187 10.4103/0019-5413.36987. PubMed PMID: 21139778; PubMed Central  
188 PMCID: PMC2989503.
- 189 A49. Belo I, Pinheiro R, Mota M. Morphological and physiological changes in  
190 *Saccharomyces cerevisiae* by oxidative stress from hyperbaric air. *Journal*  
191 *of biotechnology*. 2005;115(4):397-404. doi:  
192 10.1016/j.jbiotec.2004.09.010. PubMed PMID: 15639101.
- 193 A50. Berger KI, Ayappa I, Chatr-Amontri B, Marfatia A, Sorkin IB, Rapoport DM,  
194 et al. Obesity hypoventilation syndrome as a spectrum of respiratory  
195 disturbances during sleep. *Chest*. 2001;120(4):1231-8. PubMed PMID:  
196 11591566.
- 197 A51. Berlin J, Tutsch KD, Arzoomanian RZ, Alberti D, Binger K, Feierabend C,  
198 et al. Phase I and pharmacokinetic study of a micronized formulation of  
199 carboxyamidotriazole, a calcium signal transduction inhibitor: toxicity,  
200 bioavailability and the effect of food. *Clinical cancer research : an official*  
201 *journal of the American Association for Cancer Research*. 2002;8(1):86-  
202 94. PubMed PMID: 11801543.

- 203 A52. Bhatia S, Frank RM, Ghodadra NS, Hsu AR, Romeo AA, Bach BR, Jr., et  
204 al. The outcomes and surgical techniques of the Latarjet procedure.  
205 *Arthroscopy : the journal of arthroscopic & related surgery : official*  
206 *publication of the Arthroscopy Association of North America and the*  
207 *International Arthroscopy Association.* 2014;30(2):227-35. doi:  
208 10.1016/j.arthro.2013.10.013. PubMed PMID: 24485116.
- 209 A53. Bhattacharya A, Akhter S, Shahnawaz S, Siddiqui AW, Ahmad MZ.  
210 Evaluation of Assam Bora rice starch as plasma volume expander by  
211 polymer analysis. *Current drug delivery.* 2010;7(5):436-41. PubMed PMID:  
212 20950261.
- 213 A54. Birnbaum EH. What's new in colon and rectal surgery. *Journal of the*  
214 *American College of Surgeons.* 2006;202(3):485-94. doi:  
215 10.1016/j.jamcollsurg.2005.10.007. PubMed PMID: 16500254.
- 216 A55. Biron-Shental T, Fishman A, Fejgin MD. Medical and mechanical methods  
217 for cervical ripening. *International journal of gynaecology and obstetrics:*  
218 *the official organ of the International Federation of Gynaecology and*  
219 *Obstetrics.* 2004;85(2):159-60. doi: 10.1016/j.ijgo.2003.08.006. PubMed  
220 PMID: 15099778.
- 221 A56. Bisgaard H. Leukotriene modifiers in pediatric asthma management.  
222 *Pediatrics.* 2001;107(2):381-90. PubMed PMID: 11158473.
- 223 A57. Bishop SC, Lerch M, McCord BR. Detection of nitrated benzodiazepines  
224 by indirect laser-induced fluorescence detection on a microfluidic device.

225 Journal of chromatography A. 2007;1154(1-2):481-4. doi:  
226 10.1016/j.chroma.2007.05.004. PubMed PMID: 17499754.

227 A58. Bjornland T, Larheim TA. Discectomy of the temporomandibular joint: 3-  
228 year follow-up as a predictor of the 10-year outcome. Journal of oral and  
229 maxillofacial surgery : official journal of the American Association of Oral  
230 and Maxillofacial Surgeons. 2003;61(1):55-60. doi:  
231 10.1053/joms.2003.50010. PubMed PMID: 12524609.

232 A59. Bliwise DL, Kutner NG, Zhang R, Parker KP. Survival by time of day of  
233 hemodialysis in an elderly cohort. JAMA : the journal of the American  
234 Medical Association. 2001;286(21):2690-4. PubMed PMID: 11730444.

235 A60. Blumenthal T. Split genes: another surprise from Giardia. Current biology :  
236 CB. 2011;21(4):R162-3. doi: 10.1016/j.cub.2011.01.032. PubMed PMID:  
237 21334298.

238 A61. Bogomolny E, Giraud O. Perturbation approach to multifractal dimensions  
239 for certain critical random-matrix ensembles. Physical review E, Statistical,  
240 nonlinear, and soft matter physics. 2011;84(3 Pt 2):036212. PubMed  
241 PMID: 22060480.

242 A62. Bolognesi MP, Pietrobon R, Clifford PE, Vail TP. Comparison of a  
243 hydroxyapatite-coated sleeve and a porous-coated sleeve with a modular  
244 revision hip stem. A prospective, randomized study. The Journal of bone  
245 and joint surgery American volume. 2004;86-A(12):2720-5. PubMed  
246 PMID: 15590859.

- 247 A63. Bolon B, Campagnuolo G, Zhu L, Duryea D, Zack D, Feige U. Interleukin-  
248 1beta and tumor necrosis factor-alpha produce distinct, time-dependent  
249 patterns of acute arthritis in the rat knee. *Veterinary pathology*.  
250 2004;41(3):235-43. doi: 10.1354/vp.41-3-235. PubMed PMID: 15133172.
- 251 A64. Borgstein J. The chief's broken leg. *Lancet*. 2002;359(9310):988. doi:  
252 10.1016/S0140-6736(02)08041-8. PubMed PMID: 11918964.
- 253 A65. Bosy-Westphal A, Kossel E, Goele K, Later W, Hitze B, Settler U, et al.  
254 Contribution of individual organ mass loss to weight loss-associated  
255 decline in resting energy expenditure. *The American journal of clinical*  
256 *nutrition*. 2009;90(4):993-1001. doi: 10.3945/ajcn.2008.27402. PubMed  
257 PMID: 19710198.
- 258 A66. Boullerne AI, Rodriguez JJ, Touil T, Brochet B, Schmidt S, Abrous ND, et  
259 al. Anti-S-nitrosocysteine antibodies are a predictive marker for  
260 demyelination in experimental autoimmune encephalomyelitis:  
261 implications for multiple sclerosis. *The Journal of neuroscience : the*  
262 *official journal of the Society for Neuroscience*. 2002;22(1):123-32.  
263 PubMed PMID: 11756495.
- 264 A67. Boulouis G, Dumont F, Cordonnier C, Bodenant M, Leys D, Henon H.  
265 Intravenous thrombolysis for acute cerebral ischaemia in old stroke  
266 patients  $\geq$  80 years of age. *Journal of neurology*. 2012;259(7):1461-7.  
267 doi: 10.1007/s00415-011-6359-4. PubMed PMID: 22183776.

- 268 A68. Brasile L, Stubenitsky BM, Booster MH, Lindell S, Araneda D, Buck C, et  
269 al. Overcoming severe renal ischemia: the role of ex vivo warm perfusion.  
270 Transplantation. 2002;73(6):897-901. PubMed PMID: 11923688.
- 271 A69. Breier JI, Papanicolaou AC. Spatiotemporal patterns of brain activation  
272 during an action naming task using magnetoencephalography. Journal of  
273 clinical neurophysiology : official publication of the American  
274 Electroencephalographic Society. 2008;25(1):7-12. doi:  
275 10.1097/WNP.0b013e318163ccd5. PubMed PMID: 18303555; PubMed  
276 Central PMCID: PMC3086561.
- 277 A70. Brick AV. The medical education and the Unified Health System. Revista  
278 brasileira de cirurgia cardiovascular : orgao oficial da Sociedade Brasileira  
279 de Cirurgia Cardiovascular. 2012;27(2):331-3. PubMed PMID: 22996987.
- 280 A71. Brindle S, Douglas F, van Teijlingen E, Vanora H. Midwifery research:  
281 questionnaire surveys. RCM midwives : the official journal of the Royal  
282 College of Midwives. 2005;8(4):156-8. PubMed PMID: 15839136.
- 283 A72. Broer DJ. Liquid crystals: Defects dictated. Nature materials.  
284 2010;9(2):99-100. doi: 10.1038/nmat2617. PubMed PMID: 20094080.
- 285 A73. Brown JK, Knight PA, Wright SH, Thornton EM, Miller HR. Constitutive  
286 secretion of the granule chymase mouse mast cell protease-1 and the  
287 chemokine, CCL2, by mucosal mast cell homologues. Clinical and  
288 experimental allergy : journal of the British Society for Allergy and Clinical  
289 Immunology. 2003;33(1):132-46. PubMed PMID: 12534561.

- 290 A74. Brusca I, Li Vigni P, Sucato R, Cilluffo N, La Chiusa SM. Evaluation of  
291 antibodies to thymine ROS-modified DNA poly(dT), in patients with  
292 immunologic disorders: relationships to anti n-DNA and anti ENA  
293 autoantibodies. *Panminerva medica*. 2002;44(1):33-5. PubMed PMID:  
294 11887089.
- 295 A75. Butler FK, Gurney N. Orbital hemorrhage following face-mask barotrauma.  
296 *Undersea & hyperbaric medicine : journal of the Undersea and Hyperbaric*  
297 *Medical Society, Inc*. 2001;28(1):31-4. PubMed PMID: 11732882.
- 298 A76. Campos D, Mendez V. Reaction-diffusion wave fronts on comblike  
299 structures. *Physical review E, Statistical, nonlinear, and soft matter*  
300 *physics*. 2005;71(5 Pt 1):051104. PubMed PMID: 16089518.
- 301 A77. Carlson GA, Klein DN. How to understand divergent views on bipolar  
302 disorder in youth. *Annual review of clinical psychology*. 2014;10:529-51.  
303 doi: 10.1146/annurev-clinpsy-032813-153702. PubMed PMID: 24387237.
- 304 A78. Carroll J. Keeping ED costs down an exercise in frustration. *Managed*  
305 *care*. 2012;21(1):44-6. PubMed PMID: 22334939.
- 306 A79. Carter S, Le JD, Hu JC. Anatomic and technical considerations for  
307 optimizing recovery of sexual function during robotic-assisted radical  
308 prostatectomy. *Current opinion in urology*. 2013;23(1):88-94. doi:  
309 10.1097/MOU.0b013e32835b6602. PubMed PMID: 23169152.
- 310 A80. Casanova M, Ferrari A, Bisogno G, Merks JH, De Salvo GL, Meazza C, et  
311 al. Vinorelbine and low-dose cyclophosphamide in the treatment of  
312 pediatric sarcomas: pilot study for the upcoming European

313 Rhabdomyosarcoma Protocol. *Cancer*. 2004;101(7):1664-71. doi:  
314 10.1002/cncr.20544. PubMed PMID: 15378498.

315 A81. Cavone L, Chiarugi A. Targeting poly(ADP-ribose) polymerase-1 as a  
316 promising approach for immunomodulation in multiple sclerosis? *Trends in*  
317 *molecular medicine*. 2012;18(2):92-100. doi:  
318 10.1016/j.molmed.2011.10.002. PubMed PMID: 22078487.

319 A82. Chaigne-Delalande B, Anies G, Kramer I, Genot E. Nonadherent cells  
320 switch to a Rac-mediated, SHIP regulated, Akt activation mode for  
321 survival. *Oncogene*. 2008;27(13):1876-85. doi: 10.1038/sj.onc.1210830.  
322 PubMed PMID: 17906692.

323 A83. Chan DY, Fong KN. The effects of problem-solving skills training based on  
324 metacognitive principles for children with acquired brain injury attending  
325 mainstream schools: a controlled clinical trial. *Disability and rehabilitation*.  
326 2011;33(21-22):2023-32. doi: 10.3109/09638288.2011.556207. PubMed  
327 PMID: 21345132.

328 A84. Chan I, Bicknell SG, Graham M. Utility and diagnostic accuracy of  
329 sonography in detecting appendicitis in a community hospital. *AJR*  
330 *American journal of roentgenology*. 2005;184(6):1809-12. doi:  
331 10.2214/ajr.184.6.01841809. PubMed PMID: 15908535.

332 A85. Chang CA, Wu BH, Kuan BY. Macrocyclic lanthanide complexes as  
333 artificial nucleases and ribonucleases: effects of pH, metal ionic radii,  
334 number of coordinated water molecules, charge, and concentrations of the

335 metal complexes. *Inorganic chemistry*. 2005;44(19):6646-54. doi:  
336 10.1021/ic0485458. PubMed PMID: 16156622.

337 A86. Chase LE, Ely LO, Hutjens MF. Major advances in extension education  
338 programs in dairy production. *Journal of dairy science*. 2006;89(4):1147-  
339 54. doi: 10.3168/jds.S0022-0302(06)72183-X. PubMed PMID: 16537947.

340 A87. Chen CL, Chung CY, Cheng PT, Chen CH, Chen MH. Linguistic and gait  
341 disturbance in a child with Laurence-Moon-Biedl syndrome: left temporal  
342 and parietal lobe hypoplasia. *American journal of physical medicine &  
343 rehabilitation / Association of Academic Physiatrists*. 2004;83(1):69-74.  
344 doi: 10.1097/01.PHM.0000091989.01773.1C. PubMed PMID: 14709978.

345 A88. Chen CT, Chen YR. Update on orbital reconstruction. *Current opinion in  
346 otolaryngology & head and neck surgery*. 2010;18(4):311-6. doi:  
347 10.1097/MOO.0b013e32833aafd2. PubMed PMID: 20631536.

348 A89. Chen ML, Chang HK. Physical symptom profiles of depressed and  
349 nondepressed patients with cancer. *Palliative medicine*. 2004;18(8):712-8.  
350 PubMed PMID: 15623168.

351 A90. Chien CY, Chang YJ, Chang JE, Lee MS, Chen WY, Hsu TM, et al.  
352 Formation of Ge quantum dots array in layer-cake technique for advanced  
353 photovoltaics. *Nanotechnology*. 2010;21(50):505201. doi: 10.1088/0957-  
354 4484/21/50/505201. PubMed PMID: 21098937.

355 A91. Chiu CP, Lairson LL, Gilbert M, Wakarchuk WW, Withers SG, Strynadka  
356 NC. Structural analysis of the alpha-2,3-sialyltransferase Cst-I from  
357 *Campylobacter jejuni* in apo and substrate-analogue bound forms.



358 Biochemistry. 2007;46(24):7196-204. doi: 10.1021/bi602543d. PubMed  
359 PMID: 17518445.

360 A92. Cho SH, Godin J, Lo YH. Optofluidic Waveguides in Teflon AF-Coated  
361 PDMS Microfluidic Channels. IEEE photonics technology letters : a  
362 publication of the IEEE Laser and Electro-optics Society.  
363 2009;21(15):1057-9. doi: 10.1109/LPT.2009.2022276. PubMed PMID:  
364 20729984; PubMed Central PMCID: PMC2923848.

365 A93. Choi SJ, Kim JS, Kim JH, Oh SJ, Lee JG, Kim CJ, et al. [18F]3'-deoxy-3'-  
366 fluorothymidine PET for the diagnosis and grading of brain tumors.  
367 European journal of nuclear medicine and molecular imaging.  
368 2005;32(6):653-9. doi: 10.1007/s00259-004-1742-3. PubMed PMID:  
369 15711980.

370 A94. Choukroun J, Diss A, Simonpieri A, Girard MO, Schoeffler C, Dohan SL,  
371 et al. Platelet-rich fibrin (PRF): a second-generation platelet concentrate.  
372 Part IV: clinical effects on tissue healing. Oral surgery, oral medicine, oral  
373 pathology, oral radiology, and endodontics. 2006;101(3):e56-60. doi:  
374 10.1016/j.tripleo.2005.07.011. PubMed PMID: 16504852.

375 A95. Chow SL, Chandran V, Fazelzad R, Johnson SR. Prognostic factors for  
376 survival in systemic lupus erythematosus associated pulmonary  
377 hypertension. Lupus. 2012;21(4):353-64. doi:  
378 10.1177/0961203311429815. PubMed PMID: 22127457.

379 A96. Chuang MH, Wang YF, Chen M, Cham TM. Effectiveness of  
380 implementation of a new drug storage label and error-reducing process on

381 the accuracy of drug dispensing. Journal of medical systems.  
382 2012;36(3):1469-74. doi: 10.1007/s10916-010-9607-8. PubMed PMID:  
383 20953679.

384 A97. Clarke G. Recording wounds: Polaroid's new medically-designed  
385 cameras. British journal of community nursing. 2000;5(11):578-80.  
386 PubMed PMID: 12066058.

387 A98. Cleland JC, Logigian EL, Thaisetthawatkul P, Herrmann DN. Dispersion of  
388 the distal compound muscle action potential in chronic inflammatory  
389 demyelinating polyneuropathy and carpal tunnel syndrome. Muscle &  
390 nerve. 2003;28(2):189-93. doi: 10.1002/mus.10420. PubMed PMID:  
391 12872323.

392 A99. Clezardin P, Benzaid I, Croucher PI. Bisphosphonates in preclinical bone  
393 oncology. Bone. 2011;49(1):66-70. doi: 10.1016/j.bone.2010.11.017.  
394 PubMed PMID: 21145441.

395 A100. Coelho da Mota DS, Furtado E, Bottino DA, Bouskela E. Effects of  
396 buflomedil and pentoxifylline on hamster skin-flap microcirculation:  
397 prediction of flap viability using orthogonal polarization spectral imaging.  
398 Clinics. 2009;64(8):797-802. doi: 10.1590/S1807-59322009000800015.  
399 PubMed PMID: 19690666; PubMed Central PMCID: PMC2728195.

400 A101. Collinge C. An injectable BMP cocktail for fracture-healing--a study that  
401 others have only imagined: commentary on an article by Thomas Lyon,  
402 MD, et al.: "Efficacy and safety of recombinant human bone  
403 morphogenetic protein-2/calcium phosphate matrix for closed tibial

404 diaphyseal fracture. a double-blind, randomized, controlled phase-II/III  
405 trial". The Journal of bone and joint surgery American volume.  
406 2013;95(23):e1891-2. doi: 10.2106/JBJS.M.01179. PubMed PMID:  
407 24306712.

408 A102. Columbo LL, Rizza C, Brambilla M, Prati F, Tissoni G. A concomitant and  
409 complete set of nonvolatile all-optical logic gates based on hybrid spatial  
410 solitons. Optics express. 2014;22(6):6934-47. doi: 10.1364/OE.22.006934.  
411 PubMed PMID: 24664042.

412 A103. Cook K, Atcherson SR. Impulse noise: can hitting a softball harm your  
413 hearing? TheScientificWorldJournal. 2014;2014:702723. doi:  
414 10.1155/2014/702723. PubMed PMID: 24778596; PubMed Central  
415 PMCID: PMC3981188.

416 A104. Cooper HJ, Ranawat AS, Potter HG, Foo LF, Koob TW, Ranawat CS.  
417 Early reactive synovitis and osteolysis after total hip arthroplasty. Clinical  
418 orthopaedics and related research. 2010;468(12):3278-85. doi:  
419 10.1007/s11999-010-1361-1. PubMed PMID: 20419484; PubMed Central  
420 PMCID: PMC2974890.

421 A105. Cossu G, Boria S, Copioli C, Bracceschi R, Giuberti V, Santelli E, et al.  
422 Motor representation of actions in children with autism. PloS one.  
423 2012;7(9):e44779. doi: 10.1371/journal.pone.0044779. PubMed PMID:  
424 22970304; PubMed Central PMCID: PMC3438166.

425 A106. Costenbader KH, Prescott J, Zee RY, De Vivo I. Immunosenescence and  
426 rheumatoid arthritis: does telomere shortening predict impending disease?

427 Autoimmunity reviews. 2011;10(9):569-73. doi:  
428 10.1016/j.autrev.2011.04.034. PubMed PMID: 21575746; PubMed Central  
429 PMCID: PMC3119949.

430 A107. Crawford NR, Hee AG, Long JR. Cluster synthesis via ligand-arrested  
431 solid growth: triethylphosphine-capped fragments of binary metal  
432 chalcogenides. Journal of the American Chemical Society.  
433 2002;124(50):14842-3. PubMed PMID: 12475314.

434 A108. Crehuet R, Field MJ. Comment on "Action-derived molecular dynamics in  
435 the study of rare events". Physical review letters. 2003;90(8):089801;  
436 author reply 2. PubMed PMID: 12633474.

437 A109. Crescentini M, Bennati M, Carminati M, Tartagni M. Noise Limits of CMOS  
438 Current Interfaces for Biosensors: A Review. IEEE transactions on  
439 biomedical circuits and systems. 2014;8(2):278-92. doi:  
440 10.1109/TBCAS.2013.2262998. PubMed PMID: 24875287.

441 A110. Croft M. Co-stimulatory members of the TNFR family: keys to effective T-  
442 cell immunity? Nature reviews Immunology. 2003;3(8):609-20. doi:  
443 10.1038/nri1148. PubMed PMID: 12974476.

444 A111. Cubaud T, Sauzade M, Sun R. CO(2) dissolution in water using long  
445 serpentine microchannels. Biomicrofluidics. 2012;6(2):22002-220029. doi:  
446 10.1063/1.3693591. PubMed PMID: 22655006; PubMed Central PMCID:  
447 PMC3360710.

448 A112. Cui X, McGrath JJ, Burne TH, Mackay-Sim A, Eyles DW. Maternal vitamin  
449 D depletion alters neurogenesis in the developing rat brain. International

450 journal of developmental neuroscience : the official journal of the  
451 International Society for Developmental Neuroscience. 2007;25(4):227-32.  
452 doi: 10.1016/j.ijdevneu.2007.03.006. PubMed PMID: 17467223.

453 A113. Cunningham AP, Love WK, Zhang RW, Andrews LG, Tollefsbol TO.  
454 Telomerase inhibition in cancer therapeutics: molecular-based  
455 approaches. Current medicinal chemistry. 2006;13(24):2875-88. PubMed  
456 PMID: 17073634; PubMed Central PMCID: PMC2423208.

457 A114. Cuzick J. Forest plots and the interpretation of subgroups. Lancet.  
458 2005;365(9467):1308. doi: 10.1016/S0140-6736(05)61026-4. PubMed  
459 PMID: 15823379.

460 A115. Danyi S, Widart J, Douny C, Dang PK, Baiwir D, Wang N, et al.  
461 Determination and kinetics of enrofloxacin and ciprofloxacin in Tra catfish  
462 (Pangasianodon hypophthalmus) and giant freshwater prawn  
463 (Macrobrachium rosenbergii) using a liquid chromatography/mass  
464 spectrometry method. Journal of veterinary pharmacology and  
465 therapeutics. 2011;34(2):142-52. doi: 10.1111/j.1365-2885.2010.01204.x.  
466 PubMed PMID: 21395605.

467 A116. Dao Nguyen X, Robinson DS. Fluticasone propionate increases  
468 CD4CD25 T regulatory cell suppression of allergen-stimulated CD4CD25  
469 T cells by an IL-10-dependent mechanism. The Journal of allergy and  
470 clinical immunology. 2004;114(2):296-301. doi:  
471 10.1016/j.jaci.2004.04.048. PubMed PMID: 15316506.

472 A117. Datta S, Li J, Mahdi F, Jekabsons MB, Nagle DG, Zhou YD. Glycolysis  
473 inhibitor screening identifies the bis-geranylacylphloroglucinol  
474 protonophore moronone from *Moronobea coccinea*. *Journal of natural*  
475 *products*. 2012;75(12):2216-22. doi: 10.1021/np300711e. PubMed PMID:  
476 23245650; PubMed Central PMCID: PMC3532528.

477 A118. Davidson MJ, White JK, Baim DS. Percutaneous therapies for valvular  
478 heart disease. *Cardiovascular pathology : the official journal of the Society*  
479 *for Cardiovascular Pathology*. 2006;15(3):123-9. doi:  
480 10.1016/j.carpath.2006.02.004. PubMed PMID: 16697924.

481 A119. de Brito Galvao JF, Chew DJ. Metabolic complications of endocrine  
482 surgery in companion animals. *The Veterinary clinics of North America*  
483 *Small animal practice*. 2011;41(5):847-68, v. doi:  
484 10.1016/j.cvsm.2011.05.012. PubMed PMID: 21889689.

485 A120. De Santi L, Annunziata P. Symptomatic cranial neuralgias in multiple  
486 sclerosis: clinical features and treatment. *Clinical neurology and*  
487 *neurosurgery*. 2012;114(2):101-7. doi: 10.1016/j.clineuro.2011.10.044.  
488 PubMed PMID: 22130044.

489 A121. de Souza PL, Liauw W, Links M, Pirabhahar S, Kelly G, Howes LG. Phase  
490 I and pharmacokinetic study of weekly NV06 (Phenoxodiol), a novel  
491 isoflav-3-ene, in patients with advanced cancer. *Cancer chemotherapy*  
492 *and pharmacology*. 2006;58(4):427-33. doi: 10.1007/s00280-006-0189-6.  
493 PubMed PMID: 16463060.

- 494 A122. De Wals P, Nguyen VH, Erickson LJ, Guay M, Drapeau J, St-Laurent J.  
495 Cost-effectiveness of immunization strategies for the control of serogroup  
496 C meningococcal disease. *Vaccine*. 2004;22(9-10):1233-40. doi:  
497 10.1016/j.vaccine.2003.09.022. PubMed PMID: 15003652.
- 498 A123. DeJohn P. MedAssets lures IDNs, GPOs with buying clout. *Hospital*  
499 *material[dollar sign] management*. 2002;27(5):1, 9. PubMed PMID:  
500 12038089.
- 501 A124. Dellve L, Cernerud L, Hallberg LR. Harmonizing dilemmas. Siblings of  
502 children with DAMP and Asperger syndrome's experiences of coping with  
503 their life situations. *Scandinavian journal of caring sciences*.  
504 2000;14(3):172-8. PubMed PMID: 12035268.
- 505 A125. Dieckmann KP, Lauke H, Michl U, Winter E, Loy V. Testicular germ cell  
506 cancer despite previous local radiotherapy to the testis. *European urology*.  
507 2002;41(6):643-9; discussion 9-50. PubMed PMID: 12074782.
- 508 A126. Dobrzynska I, Szachowicz-Petelska B, Skrzydlewska E, Figaszewski ZA.  
509 Changes in electric charge and phospholipids composition in erythrocyte  
510 membrane of ethanol--poisoned rats after administration of teas. *Acta*  
511 *poloniae pharmaceutica*. 2004;61(6):483-7. PubMed PMID: 15794343.
- 512 A127. Dohan DM, Choukroun J, Diss A, Dohan SL, Dohan AJ, Mouhyi J, et al.  
513 Platelet-rich fibrin (PRF): a second-generation platelet concentrate. Part  
514 III: leucocyte activation: a new feature for platelet concentrates? *Oral*  
515 *surgery, oral medicine, oral pathology, oral radiology, and endodontics*.

516 2006;101(3):e51-5. doi: 10.1016/j.tripleo.2005.07.010. PubMed PMID:  
517 16504851.

518 A128. Dong Z, Yang B, Jin J, Li J, Kang H, Zhong X, et al. Quinoline Group  
519 Modified Carbon Nanotubes for the Detection of Zinc Ions. *Nanoscale*  
520 *research letters*. 2009;4(4):335-40. doi: 10.1007/s11671-008-9248-8.  
521 PubMed PMID: 20596287; PubMed Central PMCID: PMC2894356.

522 A129. Duffy A, Alda M, Hajek T, Grof P. Early course of bipolar disorder in high-  
523 risk offspring: prospective study. *The British journal of psychiatry : the*  
524 *journal of mental science*. 2009;195(5):457-8. doi:  
525 10.1192/bjp.bp.108.062810. PubMed PMID: 19880938.

526 A130. Dvorakova M, Nencka R, Dejmek M, Zbornikova E, Brezinova A, Pribylova  
527 M, et al. Synthesis of alkylcarbonate analogs of O-acetyl-ADP-ribose.  
528 *Organic & biomolecular chemistry*. 2013;11(34):5702-13. doi:  
529 10.1039/c3ob41016a. PubMed PMID: 23884430.

530 A131. Dyce J, Olmstead ML. Removal of infected canine cemented total hip  
531 prostheses using a femoral window technique. *Veterinary surgery : VS*.  
532 2002;31(6):552-60. PubMed PMID: 12415524.

533 A132. Eagar P, Hull ML, Howell SM. A method for quantifying the anterior load-  
534 displacement behavior of the human knee in both the low and high  
535 stiffness regions. *Journal of biomechanics*. 2001;34(12):1655-60. PubMed  
536 PMID: 11716869.

537 A133. El Demellawy D, Herath C, Khalil M, Nasr A, Moussa B. Fibromatosis of  
538 the male breast with concurrent florid-type gynecomastia: Report of a case



539 and review of literature. Pathology, research and practice.  
540 2011;207(5):306-9. doi: 10.1016/j.prp.2010.11.005. PubMed PMID:  
541 21511401.

542 A134. Elagili F, Abdullah N, Fong L, Pei T. Aspiration of breast abscess under  
543 ultrasound guidance: outcome obtained and factors affecting success.  
544 Asian journal of surgery / Asian Surgical Association. 2007;30(1):40-4. doi:  
545 10.1016/S1015-9584(09)60126-3. PubMed PMID: 17337370.

546 A135. Elias ER, Hansen RM, Irons M, Quinn NB, Fulton AB. Rod photoreceptor  
547 responses in children with Smith-Lemli-Opitz syndrome. Archives of  
548 ophthalmology. 2003;121(12):1738-43. doi:  
549 10.1001/archopht.121.12.1738. PubMed PMID: 14662594.

550 A136. Estall JL, Drucker DJ. Dual regulation of cell proliferation and survival via  
551 activation of glucagon-like peptide-2 receptor signaling. The Journal of  
552 nutrition. 2003;133(11):3708-11. PubMed PMID: 14608100.

553 A137. Esteban J, Martin-de-Hijas NZ, Ortiz A, Kinnari TJ, Bodas Sanchez A,  
554 Gadea I, et al. Detection of lfrA and tap efflux pump genes among clinical  
555 isolates of non-pigmented rapidly growing mycobacteria. International  
556 journal of antimicrobial agents. 2009;34(5):454-6. doi:  
557 10.1016/j.ijantimicag.2009.06.026. PubMed PMID: 19665358.

558 A138. Fairman J. A historian's look at the 2012 IOM report on the future of  
559 nursing. MD advisor : a journal for New Jersey medical community.  
560 2012;5(4):20-5. PubMed PMID: 23132104.

561 A139. Farias-Silva E, dos Santos IN, Corezola do Amaral ME, Grassi-Kassisse  
562 DM, Spadari-Bratfisch RC. Glucocorticoid receptor and Beta-adrenoceptor  
563 expression in epididymal adipose tissue from stressed rats. *Annals of the*  
564 *New York Academy of Sciences*. 2004;1018:328-32. doi:  
565 10.1196/annals.1296.040. PubMed PMID: 15240386.

566 A140. Farmer AD, Collings AF, Jameson GJ. The application of power  
567 ultrasound to the surface cleaning of silica and heavy mineral sands.  
568 *Ultrasonics sonochemistry*. 2000;7(4):243-7. PubMed PMID: 11062883.

569 A141. Feldsine PT, Montgomery-Fullerton M, Roa N, Kaur M, Kerr DE, Lienau  
570 AH, et al. Comparative validation study to demonstrate the equivalence of  
571 a minor modification to AOAC Official Method 2005.05 Assurance GDS  
572 shiga Toxin Genes (O157) method to the reference culture method: 375  
573 gram sample size. *Journal of AOAC International*. 2013;96(4):781-5.  
574 PubMed PMID: 24000752.

575 A142. Feng HT, Wong N, Wee S, Lee MM. Simultaneous determination of 19  
576 intracellular nucleotides and nucleotide sugars in Chinese Hamster ovary  
577 cells by capillary electrophoresis. *Journal of chromatography B, Analytical*  
578 *technologies in the biomedical and life sciences*. 2008;870(1):131-4. doi:  
579 10.1016/j.jchromb.2008.05.038. PubMed PMID: 18541463.

580 A143. Feng J, Guo H, Li S, Lu T. A study of the mechanism of the chaperone-  
581 like function of an scFv of human creatine kinase by computer simulation.  
582 *PloS one*. 2013;8(4):e62147. doi: 10.1371/journal.pone.0062147. PubMed  
583 PMID: 23637984; PubMed Central PMCID: PMC3634753.

584 A144. Fernandez NV, Mestre MC, Marchelli P, Fontenla SB. Yeast and yeast-  
585 like fungi associated with dry indehiscent fruits of *Nothofagus nervosa* in  
586 Patagonia, Argentina. *FEMS microbiology ecology*. 2012;80(1):179-92.  
587 doi: 10.1111/j.1574-6941.2011.01287.x. PubMed PMID: 22224476.

588 A145. Fiederling J, Ulrich CM, Hemminki K, Haug U. Consideration of family  
589 history of cancer in medical routine: a survey in the primary care setting in  
590 Germany. *European journal of cancer prevention : the official journal of*  
591 *the European Cancer Prevention Organisation*. 2014;23(3):199-205. doi:  
592 10.1097/CEJ.0b013e328364743d. PubMed PMID: 23880939.

593 A146. Fiuzat M, Wojdyla D, Kitzman D, Fleg J, Keteyian SJ, Kraus WE, et al.  
594 Relationship of beta-blocker dose with outcomes in ambulatory heart  
595 failure patients with systolic dysfunction: results from the HF-ACTION  
596 (Heart Failure: A Controlled Trial Investigating Outcomes of Exercise  
597 Training) trial. *Journal of the American College of Cardiology*.  
598 2012;60(3):208-15. doi: 10.1016/j.jacc.2012.03.023. PubMed PMID:  
599 22560018; PubMed Central PMCID: PMC3396733.

600 A147. Fogliano V, Vitaglione P. Functional foods: planning and development.  
601 *Molecular nutrition & food research*. 2005;49(3):256-62. doi:  
602 10.1002/mnfr.200400067. PubMed PMID: 15744710.

603 A148. Fontanesi JM, Flesher DS, Jr., De Guire M, Lieberthal A, Holcomb K. The  
604 cost of doing business: cost structure of electronic immunization registries.  
605 *Health services research*. 2002;37(5):1291-307. PubMed PMID:  
606 12479497; PubMed Central PMCID: PMC1464026.

- 607 A149. Frandoloso R, Martinez-Martinez S, Gutierrez-Martin CB, Rodriguez-Ferri  
608 EF. Haemophilus parasuis serovar 5 Nagasaki strain adheres and invades  
609 PK-15 cells. Veterinary microbiology. 2012;154(3-4):347-52. doi:  
610 10.1016/j.vetmic.2011.07.022. PubMed PMID: 21839589.
- 611 A150. Freuler F, Stettler T, Meyerhofer M, Leder L, Mayr LM. Development of a  
612 novel Gateway-based vector system for efficient, multiparallel protein  
613 expression in Escherichia coli. Protein expression and purification.  
614 2008;59(2):232-41. doi: 10.1016/j.pep.2008.02.003. PubMed PMID:  
615 18375142.
- 616 A151. Fuhrs H, Behrens C, Gallien S, Heintz D, Van Dorsselaer A, Braun HP, et  
617 al. Physiological and proteomic characterization of manganese sensitivity  
618 and tolerance in rice (Oryza sativa) in comparison with barley (Hordeum  
619 vulgare). Annals of botany. 2010;105(7):1129-40. doi:  
620 10.1093/aob/mcq046. PubMed PMID: 20237113; PubMed Central  
621 PMCID: PMC2887067.
- 622 A152. Gao Y, Miao C, Wang Y, Xia J, Zhou P. Metal-resistant microorganisms  
623 and metal chelators synergistically enhance the phytoremediation  
624 efficiency of Solanum nigrum L. in Cd- and Pb-contaminated soil.  
625 Environmental technology. 2012;33(10-12):1383-9. PubMed PMID:  
626 22856313.
- 627 A153. Gardiner J, Barton D, Overall R, Marc J. Neurotrophic support and  
628 oxidative stress: converging effects in the normal and diseased nervous  
629 system. The Neuroscientist : a review journal bringing neurobiology,

630 neurology and psychiatry. 2009;15(1):47-61. doi:  
631 10.1177/1073858408325269. PubMed PMID: 19218230.

632 A154. Gaudiano MC, Antoniella E, Bertocchi P, Valvo L. Development and  
633 validation of a reversed-phase LC method for analysing potentially  
634 counterfeit antimalarial medicines. Journal of pharmaceutical and  
635 biomedical analysis. 2006;42(1):132-5. doi: 10.1016/j.jpba.2006.01.059.  
636 PubMed PMID: 16517111.

637 A155. Geocadin RG, Koenig MA. Neurological consultation in the ICU. Seminars  
638 in neurology. 2008;28(5):601-2. doi: 10.1055/s-0028-1105980. PubMed  
639 PMID: 19115167.

640 A156. Germa F. The bridge-builders. Canadian family physician Medecin de  
641 famille canadien. 2009;55(5):512-3. PubMed PMID: 19439710; PubMed  
642 Central PMCID: PMC2682314.

643 A157. Gerritsen L, Tendolkar I, Franke B, Vasquez AA, Kooijman S, Buitelaar J,  
644 et al. BDNF Val66Met genotype modulates the effect of childhood  
645 adversity on subgenual anterior cingulate cortex volume in healthy  
646 subjects. Molecular psychiatry. 2012;17(6):597-603. doi:  
647 10.1038/mp.2011.51. PubMed PMID: 21577214.

648 A158. Gershon MD. Developmental determinants of the independence and  
649 complexity of the enteric nervous system. Trends in neurosciences.  
650 2010;33(10):446-56. doi: 10.1016/j.tins.2010.06.002. PubMed PMID:  
651 20633936.

652 A159. Gervasi MG, Marczylo TH, Lam PM, Rana S, Franchi AM, Konje JC, et al.  
653 Anandamide levels fluctuate in the bovine oviduct during the oestrous  
654 cycle. PloS one. 2013;8(8):e72521. doi: 10.1371/journal.pone.0072521.  
655 PubMed PMID: 23977311; PubMed Central PMCID: PMC3745412.

656 A160. Ghirardi JJ, Caja G, Garin D, Casellas J, Hernandez-Jover M. Evaluation  
657 of the retention of electronic identification boluses in the forestomachs of  
658 cattle. Journal of animal science. 2006;84(8):2260-8. doi:  
659 10.2527/jas.2005-758. PubMed PMID: 16864888.

660 A161. Gidron A, Tallman MS. 2-CdA in the treatment of hairy cell leukemia: a  
661 review of long-term follow-up. Leukemia & lymphoma. 2006;47(11):2301-  
662 7. doi: 10.1080/10428190600822052. PubMed PMID: 17107901.

663 A162. Gilchrest BA. If it's not the hamburgers, it's the sunscreens. The Journal of  
664 investigative dermatology. 2004;123(1):xi-xii. doi: 10.1111/j.0022-  
665 202X.2004.22740.x. PubMed PMID: 15191577.

666 A163. Glaser D. Re: Khalili et al.--chronic Hepatitis C treatment in interferon  
667 nonresponders. The American journal of gastroenterology.  
668 2000;95(11):3315-6. doi: 10.1111/j.1572-0241.2000.03315.x. PubMed  
669 PMID: 11095370.

670 A164. Glud SZ, Sorensen AB, Andrulis M, Wang B, Kondo E, Jessen R, et al. A  
671 tumor-suppressor function for NFATc3 in T-cell lymphomagenesis by  
672 murine leukemia virus. Blood. 2005;106(10):3546-52. doi: 10.1182/blood-  
673 2005-02-0493. PubMed PMID: 16051745; PubMed Central PMCID:  
674 PMC1895049.

675 A165. Golde TE, Eckman CB, Younkin SG. Biochemical detection of Abeta  
676 isoforms: implications for pathogenesis, diagnosis, and treatment of  
677 Alzheimer's disease. *Biochimica et biophysica acta*. 2000;1502(1):172-87.  
678 PubMed PMID: 10899442.

679 A166. Grabowski GA. Gaucher's disease. Enzyme therapy is not enough.  
680 *Lancet*. 2001;358 Suppl:S29. PubMed PMID: 11784578.

681 A167. Green E, Ingoglia JN, Phillips C. Share what works: model practices in  
682 local public health agencies. *Journal of public health management and*  
683 *practice : JPHMP*. 2004;10(2):180-2. PubMed PMID: 14967987.

684 A168. Gregori Junior F. Conservative surgical management of mitral  
685 insufficiency: an alternative approach. *Revista brasileira de cirurgia*  
686 *cardiovascular : orgao oficial da Sociedade Brasileira de Cirurgia*  
687 *Cardiovascular*. 2012;27(2):312-7. PubMed PMID: 22996984.

688 A169. Gregory RJ, DeLucia-Deranja E, Mogle JA. Dynamic deconstructive  
689 psychotherapy versus optimized community care for borderline personality  
690 disorder co-occurring with alcohol use disorders: a 30-month follow-up.  
691 *The Journal of nervous and mental disease*. 2010;198(4):292-8. doi:  
692 10.1097/NMD.0b013e3181d6172d. PubMed PMID: 20386259.

693 A170. Gregory RL. Editorial essay: magic. *Perception*. 2006;35(10):1295-6.  
694 PubMed PMID: 17214376.

695 A171. Greven H, Richter S. Morphology of skin incubation in *Pipa carvalhoi*  
696 (Anura: Pipidae). *Journal of morphology*. 2009;270(11):1311-9. doi:  
697 10.1002/jmor.10759. PubMed PMID: 19434720.

- 698 A172. Grohn A, Suonmaa V, Auvinen A, Lehtinen KE, Jokiniemi J. Reduction of  
699 fine particle emissions from wood combustion with optimized condensing  
700 heat exchangers. *Environmental science & technology*. 2009;43(16):6269-  
701 74. PubMed PMID: 19746724.
- 702 A173. Gros F. From the messenger RNA saga to the transcriptome era.  
703 *Comptes rendus biologies*. 2003;326(10-11):893-900. PubMed PMID:  
704 14744095.
- 705 A174. Grucza RA, Plunk AD, Hipp PR, Cavazos-Rehg P, Krauss MJ, Brownson  
706 RC, et al. Long-term effects of laws governing youth access to tobacco.  
707 *American journal of public health*. 2013;103(8):1493-9. doi:  
708 10.2105/AJPH.2012.301123. PubMed PMID: 23763414; PubMed Central  
709 PMCID: PMC3710295.
- 710 A175. Guan B, Chen X, Zhang H. Two-electrode voltage clamp. *Methods in*  
711 *molecular biology*. 2013;998:79-89. doi: 10.1007/978-1-62703-351-0\_6.  
712 PubMed PMID: 23529422.
- 713 A176. Guo P, Wang J, Pan DC, Xu GH. Poly[diacquabis(mu(3)-  
714 hexamethylenetetramine)[mu(2)-2,2'-(piperazine-1,4-diyl)bis(  
715 ethanesulfonato)]disilver(I)]: a three-dimensional pillared-layer framework  
716 encapsulating a water chain of (H(2)O)(12) clusters. *Acta*  
717 *crystallographica Section C, Crystal structure communications*. 2010;66(Pt  
718 9):m266-8. doi: 10.1107/S0108270110032609. PubMed PMID: 20814100.
- 719 A177. Haas LF. Neurological stamp: Paul Ehrlich (1854-1915) and Emil Adolf  
720 von Behring (1854-1917). *Journal of neurology, neurosurgery, and*



721 psychiatry. 2001;70(5):678. PubMed PMID: 11309466; PubMed Central  
722 PMCID: PMC1737363.

723 A178. Hale FA. Crown lengthening for mandibular and maxillary canine teeth in  
724 the dog. Journal of veterinary dentistry. 2001;18(4):219-21. PubMed  
725 PMID: 11968902.

726 A179. Hallock GG. Sequential bilateral breast reconstruction using a split solitary  
727 deep inferior epigastric artery perforator flap. Journal of reconstructive  
728 microsurgery. 2012;28(9):573-5. doi: 10.1055/s-0032-1315781. PubMed  
729 PMID: 22744898.

730 A180. Hao Y, Hao G, Qiu S, Wang B. Effects of age and gender on the likelihood  
731 of hip fracture in the elderly population in Shanghai, China. Saudi medical  
732 journal. 2009;30(11):1483-5. PubMed PMID: 19882067.

733 A181. Hassan SF, Rashid U, Ansari FL, Ul-Haq Z. Bioisosteric approach in  
734 designing new monastrol derivatives: an investigation on their ADMET  
735 prediction using in silico derived parameters. Journal of molecular  
736 graphics & modelling. 2013;45:202-10. doi: 10.1016/j.jm gm.2013.09.002.  
737 PubMed PMID: 24080467.

738 A182. Hausberg M, Hillebrand U, Kisters K. Addressing the relationship between  
739 sympathetic activity and inflammation. Journal of hypertension.  
740 2008;26(12):2276-8. doi: 10.1097/HJH.0b013e328318efd4. PubMed  
741 PMID: 19008705.

742 A183. Hayashi S, Hatashita M, Hayashi A, Matsumoto H, Shioura H, Kitai R.  
743 Thermosensitization by parthenolide in human lung adenocarcinoma A549

744 cells and p53- and hsp72-independent apoptosis induction via the nuclear  
745 factor-kappaB signal pathway. *International journal of molecular medicine*.  
746 2008;21(5):585-92. PubMed PMID: 18425350.

747 A184. Hayreh SS. Posterior ischaemic optic neuropathy: clinical features,  
748 pathogenesis, and management. *Eye*. 2004;18(11):1188-206. doi:  
749 10.1038/sj.eye.6701562. PubMed PMID: 15534605.

750 A185. Hede K. Stem cell treatments raise thorny questions for researchers,  
751 clinicians. *Journal of the National Cancer Institute*. 2012;104(5):347-9. doi:  
752 10.1093/jnci/djs154. PubMed PMID: 22349201.

753 A186. Helinck S, Le Bars D, Moreau D, Yvon M. Ability of thermophilic lactic acid  
754 bacteria to produce aroma compounds from amino acids. *Applied and  
755 environmental microbiology*. 2004;70(7):3855-61. doi:  
756 10.1128/AEM.70.7.3855-3861.2004. PubMed PMID: 15240255; PubMed  
757 Central PMCID: PMC444772.

758 A187. Herde M, Koo AJ, Howe GA. Elicitation of jasmonate-mediated defense  
759 responses by mechanical wounding and insect herbivory. *Methods in  
760 molecular biology*. 2013;1011:51-61. doi: 10.1007/978-1-62703-414-2\_5.  
761 PubMed PMID: 23615987.

762 A188. Hickey B, Heneghan C, de Chazal P. Non-episode-dependent  
763 assessment of paroxysmal atrial fibrillation through measurement of RR  
764 interval dynamics and atrial premature contractions. *Annals of biomedical  
765 engineering*. 2004;32(5):677-87. PubMed PMID: 15171622.

766 A189. Higuchi T, Shiraishi T, Shirakusa T, Hirayama S, Shibaguchi H, Kuroki M,  
767 et al. Prevention of acute lung allograft rejection in rat by the janus kinase  
768 3 inhibitor, tyrphostin AG490. The Journal of heart and lung  
769 transplantation : the official publication of the International Society for  
770 Heart Transplantation. 2005;24(10):1557-64. doi:  
771 10.1016/j.healun.2004.11.017. PubMed PMID: 16210130.

772 A190. Hill PC, Jackson-Sillah D, Fox A, Franken KL, Lugos MD, Jeffries DJ, et  
773 al. ESAT-6/CFP-10 fusion protein and peptides for optimal diagnosis of  
774 mycobacterium tuberculosis infection by ex vivo enzyme-linked  
775 immunospot assay in the Gambia. Journal of clinical microbiology.  
776 2005;43(5):2070-4. doi: 10.1128/JCM.43.5.2070-2074.2005. PubMed  
777 PMID: 15872224; PubMed Central PMCID: PMC1153808.

778 A191. Hill-Briggs F, Renosky R, Lazo M, Bone L, Hill M, Levine D, et al.  
779 Development and pilot evaluation of literacy-adapted diabetes and CVD  
780 education in urban, diabetic African Americans. Journal of general internal  
781 medicine. 2008;23(9):1491-4. doi: 10.1007/s11606-008-0679-9. PubMed  
782 PMID: 18521688; PubMed Central PMCID: PMC2518002.

783 A192. Hoffman JN, Faist E. Coagulation inhibitor replacement during sepsis:  
784 useless? Critical care medicine. 2000;28(9 Suppl):S74-6. PubMed PMID:  
785 11007203.

786 A193. Hoi Y, Wasserman BA, Xie YJ, Najjar SS, Ferruci L, Lakatta EG, et al.  
787 Characterization of volumetric flow rate waveforms at the carotid  
788 bifurcations of older adults. Physiological measurement. 2010;31(3):291-

789 302. doi: 10.1088/0967-3334/31/3/002. PubMed PMID: 20086276;  
790 PubMed Central PMCID: PMC2943236.

791 A194. Hollon SD, Jarrett RB, Nierenberg AA, Thase ME, Trivedi M, Rush AJ.  
792 Psychotherapy and medication in the treatment of adult and geriatric  
793 depression: which monotherapy or combined treatment? *The Journal of*  
794 *clinical psychiatry*. 2005;66(4):455-68. PubMed PMID: 15816788.

795 A195. Honeycutt RL, Rowe DL, Gallardo MH. Molecular systematics of the South  
796 American caviomorph rodents: relationships among species and genera in  
797 the family Octodontidae. *Molecular phylogenetics and evolution*.  
798 2003;26(3):476-89. PubMed PMID: 12644405.

799 A196. Hoopes MI, Faller R, Longo ML. Lipid domain depletion at small localized  
800 bends imposed by a step geometry. *Langmuir : the ACS journal of*  
801 *surfaces and colloids*. 2011;27(6):2783-8. doi: 10.1021/la104504p.  
802 PubMed PMID: 21338070.

803 A197. Hori K, Yamakawa M, Tanaka N, Murakami H, Kaya M, Hori S. Influence  
804 of sound and light on heart rate variability. *Journal of human ergology*.  
805 2005;34(1-2):25-34. PubMed PMID: 17393762.

806 A198. Horiguchi K, Fujiwara K, Ilmiawati C, Kikuchi M, Tsukada T, Kouki T, et al.  
807 Caveolin 3-mediated integrin beta1 signaling is required for the  
808 proliferation of folliculostellate cells in rat anterior pituitary gland under the  
809 influence of extracellular matrix. *The Journal of endocrinology*.  
810 2011;210(1):29-36. doi: 10.1530/JOE-11-0103. PubMed PMID: 21508095.

- 811 A199. Horowitz JC, Ajayi IO, Kulasekaran P, Rogers DS, White JB, Townsend  
812 SK, et al. Survivin expression induced by endothelin-1 promotes  
813 myofibroblast resistance to apoptosis. *The international journal of*  
814 *biochemistry & cell biology*. 2012;44(1):158-69. doi:  
815 10.1016/j.biocel.2011.10.011. PubMed PMID: 22041029; PubMed Central  
816 PMCID: PMC3241828.
- 817 A200. Huang KL, Tsai SJ. St. John's wort (*Hypericum perforatum*) as a treatment  
818 for premenstrual dysphoric disorder: case report. *International journal of*  
819 *psychiatry in medicine*. 2003;33(3):295-7. PubMed PMID: 15089009.
- 820 A201. Huey ED. Frontotemporal dementia. *The American journal of psychiatry*.  
821 2014;171(6):695-6. doi: 10.1176/appi.ajp.2014.14020215. PubMed PMID:  
822 24880519.
- 823 A202. Humpert PM, Neuwirth R, Battista MJ, Voronko O, von Eynatten M,  
824 Konrade I, et al. SDF-1 genotype influences insulin-dependent  
825 mobilization of adult progenitor cells in type 2 diabetes. *Diabetes care*.  
826 2005;28(4):934-6. PubMed PMID: 15793201.
- 827 A203. Hur YM, Kwon JS. Changes in twinning rates in South Korea: 1981-2002.  
828 *Twin research and human genetics : the official journal of the International*  
829 *Society for Twin Studies*. 2005;8(1):76-9. doi:  
830 10.1375/1832427053435445. PubMed PMID: 15836815.
- 831 A204. Hutcheson JD, Setola V, Roth BL, Merryman WD. Serotonin receptors  
832 and heart valve disease--it was meant 2B. *Pharmacology & therapeutics*.

833 2011;132(2):146-57. doi: 10.1016/j.pharmthera.2011.03.008. PubMed  
834 PMID: 21440001; PubMed Central PMCID: PMC3179857.

835 A205. Huttenhower C, Hibbs M, Myers C, Troyanskaya OG. A scalable method  
836 for integration and functional analysis of multiple microarray datasets.  
837 Bioinformatics. 2006;22(23):2890-7. doi: 10.1093/bioinformatics/btl492.  
838 PubMed PMID: 17005538.

839 A206. Hutter HP, Moshhammer H, Wallner P, Cartellieri M, Denk-Linnert DM,  
840 Katzinger M, et al. Tinnitus and mobile phone use. Occupational and  
841 environmental medicine. 2010;67(12):804-8. doi:  
842 10.1136/oem.2009.048116. PubMed PMID: 20573849.

843 A207. Iijima M, Brantley WA, Guo WH, Clark WA, Yuasa T, Mizoguchi I. X-ray  
844 diffraction study of low-temperature phase transformations in nickel-  
845 titanium orthodontic wires. Dental materials : official publication of the  
846 Academy of Dental Materials. 2008;24(11):1454-60. doi:  
847 10.1016/j.dental.2008.03.005. PubMed PMID: 18452984.

848 A208. Iino Y, Tanaka M, Hatano N, Kiyokawa M, Takebayashi H, Shinohara I, et  
849 al. A case of a five-year-old boy with acute retinal necrosis. Retina.  
850 2002;22(2):225-8. PubMed PMID: 11927861.

851 A209. Ikeda Y, Imai Y, Kumagai H, Nosaka T, Morikawa Y, Hisaoka T, et al.  
852 Vasin, a transforming growth factor beta-binding protein expressed in  
853 vascular smooth muscle cells, modulates the arterial response to injury in  
854 vivo. Proceedings of the National Academy of Sciences of the United

855 States of America. 2004;101(29):10732-7. doi: 10.1073/pnas.0404117101.  
856 PubMed PMID: 15247411; PubMed Central PMCID: PMC490003.

857 A210. Inoue Y, Ogasawara M, Moroi T, Satake M, Azumi K, Moritomo T, et al.  
858 Characteristics of NADPH oxidase genes (Nox2, p22, p47, and p67) and  
859 Nox4 gene expressed in blood cells of juvenile *Ciona intestinalis*.  
860 Immunogenetics. 2005;57(7):520-34. doi: 10.1007/s00251-005-0010-4.  
861 PubMed PMID: 16025326.

862 A211. Ito R, Umezawa N, Higuchi T. Unique oxidation reaction of amides with  
863 pyridine-N-oxide catalyzed by ruthenium porphyrin: direct oxidative  
864 conversion of N-acyl-L-proline to N-acyl-L-glutamate. Journal of the  
865 American Chemical Society. 2005;127(3):834-5. doi: 10.1021/ja045603f.  
866 PubMed PMID: 15656611.

867 A212. Ivekovic D, Milardovic S, Roboz M, Grabaric BS. Evaluation of the  
868 antioxidant activity by flow injection analysis method with  
869 electrochemically generated ABTS radical cation. The Analyst.  
870 2005;130(5):708-14. doi: 10.1039/b415939j. PubMed PMID: 15852141.

871 A213. Iyer U, Mathur G, Panchanmiya N, Dhruv S. Risk Factor Scenario in an  
872 Industrial Set-up: Need for an Effective Screening Tool to Assess the  
873 High-Risk Group. Indian journal of community medicine : official  
874 publication of Indian Association of Preventive & Social Medicine.  
875 2010;35(2):262-6. doi: 10.4103/0970-0218.66884. PubMed PMID:  
876 20922103; PubMed Central PMCID: PMC2940182.

877 A214. Jager M, Knoll C, Hamprecht FA. Weakly supervised learning of a  
878 classifier for unusual event detection. IEEE transactions on image  
879 processing : a publication of the IEEE Signal Processing Society.  
880 2008;17(9):1700-8. doi: 10.1109/TIP.2008.2001043. PubMed PMID:  
881 18701402.

882 A215. Jain NB, Higgins LD. Re: "Treatment options in knee osteoarthritis: total  
883 knee arthroplasty versus platelet-rich plasma". PM & R : the journal of  
884 injury, function, and rehabilitation. 2011;3(7):681-2; author reply 2. doi:  
885 10.1016/j.pmrj.2011.04.017. PubMed PMID: 21777870.

886 A216. Jerng HH, Lauver AD, Pfaffinger PJ. DPP10 splice variants are localized  
887 in distinct neuronal populations and act to differentially regulate the  
888 inactivation properties of Kv4-based ion channels. Molecular and cellular  
889 neurosciences. 2007;35(4):604-24. doi: 10.1016/j.mcn.2007.03.008.  
890 PubMed PMID: 17475505; PubMed Central PMCID: PMC3674967.

891 A217. Johnson TW, Wassersug RJ. Gender identity disorder outside the binary:  
892 when gender identity disorder-not otherwise specified is not good enough.  
893 Archives of sexual behavior. 2010;39(3):597-8. doi: 10.1007/s10508-010-  
894 9608-1. PubMed PMID: 20182785.

895 A218. Joyce MG, Sun PD. The structural basis of ligand recognition by natural  
896 killer cell receptors. Journal of biomedicine & biotechnology.  
897 2011;2011:203628. doi: 10.1155/2011/203628. PubMed PMID: 21629745;  
898 PubMed Central PMCID: PMC3100565.



899 A219. Jun HW, Taite LJ, West JL. Nitric oxide-producing polyurethanes.  
900 Biomacromolecules. 2005;6(2):838-44. doi: 10.1021/bm049419y. PubMed  
901 PMID: 15762649.

902 A220. Junkin M, Lu Y, Long J, Deymier PA, Hoying JB, Wong PK. Mechanically  
903 induced intercellular calcium communication in confined endothelial  
904 structures. Biomaterials. 2013;34(8):2049-56. doi:  
905 10.1016/j.biomaterials.2012.11.060. PubMed PMID: 23267827; PubMed  
906 Central PMCID: PMC3542404.

907 A221. Jyvakorpi SK, Puranen T, Pitkala KH, Suominen MH. Nutritional treatment  
908 of aged individuals with Alzheimer disease living at home with their  
909 spouses: study protocol for a randomized controlled trial. Trials.  
910 2012;13:66. doi: 10.1186/1745-6215-13-66. PubMed PMID: 22624652;  
911 PubMed Central PMCID: PMC3517368.

912 A222. Kaassis M, Boyer J, Dumas R, Ponchon T, Coumaros D, Delcenserie R,  
913 et al. Plastic or metal stents for malignant stricture of the common bile  
914 duct? Results of a randomized prospective study. Gastrointestinal  
915 endoscopy. 2003;57(2):178-82. doi: 10.1067/mge.2003.66. PubMed  
916 PMID: 12556780.

917 A223. Kahaleh M, Hermans P, Buset M, Dargent JL. Primary neutrophil-rich,  
918 CD30-positive anaplastic large cell lymphoma of the stomach: case report  
919 and review of the literature. Acta gastro-enterologica Belgica.  
920 2002;65(4):237-40. PubMed PMID: 12619433.

921 A224. Kajihō H, Saito K, Tsujita K, Kontani K, Araki Y, Kurosu H, et al. RIN3: a  
922 novel Rab5 GEF interacting with amphiphysin II involved in the early  
923 endocytic pathway. *Journal of cell science*. 2003;116(Pt 20):4159-68. doi:  
924 10.1242/jcs.00718. PubMed PMID: 12972505.

925 A225. Kalman D, Janosi S, Egyed L. Role of bovine herpesvirus 4 in bacterial  
926 bovine mastitis. *Microbial pathogenesis*. 2004;37(3):125-9. doi:  
927 10.1016/j.micpath.2004.06.011. PubMed PMID: 15351035.

928 A226. Kang CM, Choi SH, Kim SC, Lee WJ, Choi DW, Kim SW, et al. Predicting  
929 Recurrence of Pancreatic Solid Pseudopapillary Tumors After Surgical  
930 Resection: A Multicenter Analysis in Korea. *Annals of surgery*. 2014. doi:  
931 10.1097/SLA.0000000000000583. PubMed PMID: 24743622.

932 A227. Kang HS, Roh HG, Han MH, Koh YC. Successful endovascular occlusion  
933 of a ruptured distal anterior inferior cerebellar artery aneurysm of the  
934 caudal trunk: case report. *Interventional neuroradiology : journal of*  
935 *peritherapeutic neuroradiology, surgical procedures and related*  
936 *neurosciences*. 2007;13(3):271-6. PubMed PMID: 20566118; PubMed  
937 Central PMCID: PMC3345489.

938 A228. Kato K, Hara A, Kuno T, Mori H, Yamashita T, Toida M, et al. Aberrant  
939 promoter hypermethylation of p16 and MGMT genes in oral squamous cell  
940 carcinomas and the surrounding normal mucosa. *Journal of cancer*  
941 *research and clinical oncology*. 2006;132(11):735-43. doi:  
942 10.1007/s00432-006-0122-8. PubMed PMID: 16791592.

943 A229. Kato Y, Ogiwara K, Fujimori C, Kimura A, Takahashi T. Expression and  
944 localization of collagen type IV alpha1 chain in medaka ovary. Cell and  
945 tissue research. 2010;340(3):595-605. doi: 10.1007/s00441-010-0969-5.  
946 PubMed PMID: 20424863.

947 A230. Kestin SC. Review of welfare concerns relating to commercial and special  
948 permit (scientific) whaling. The Veterinary record. 2001;148(10):304-7.  
949 PubMed PMID: 11315136.

950 A231. Kido VJ. The UAP dilemma. Nursing management. 2001;32(11):27-9.  
951 PubMed PMID: 15129540.

952 A232. Kiecolt-Glaser JK, McGuire L, Robles TF, Glaser R.  
953 Psychoneuroimmunology: psychological influences on immune function  
954 and health. Journal of consulting and clinical psychology. 2002;70(3):537-  
955 47. PubMed PMID: 12090368.

956 A233. Kieran NE, Rabb H. Immune responses in kidney preservation and  
957 reperfusion injury. Journal of investigative medicine : the official  
958 publication of the American Federation for Clinical Research.  
959 2004;52(5):310-4. PubMed PMID: 15551653.

960 A234. Kikuchi H, Sakurai H, Nagura T, Aritsuka T, Tomita F, Yokota A. One-pot  
961 conversion of levan prepared from Serratia levanicum NN to difructose  
962 anhydride IV by Arthrobacter nicotinovorans levan fructotransferase.  
963 Journal of bioscience and bioengineering. 2010;109(3):240-3. doi:  
964 10.1016/j.jbiosc.2009.09.041. PubMed PMID: 20159571.

965 A235. Killiany RJ. Isn't amyloid more than just a marker for Alzheimer disease?  
966 Neurology. 2009;73(15):1174-5. doi: 10.1212/WNL.0b013e3181be020a.  
967 PubMed PMID: 19741212.

968 A236. Kim DG, Park SC, Moon IS, Lee MD. Reconstruction of three right hepatic  
969 veins using cadaveric iliac vein in right lobe living donor liver  
970 transplantation: case report. Transplantation proceedings.  
971 2008;40(8):2523-4. doi: 10.1016/j.transproceed.2008.07.022. PubMed  
972 PMID: 18929787.

973 A237. Kipshidze N, Rukhadze I, Archvadze A, Kipiani V, Kipshidze N, Lapiashvili  
974 E, et al. Endovascular treatment of patients with chronic cerebrospinal  
975 venous insufficiency and multiple sclerosis. Georgian medical news.  
976 2011;(199):29-34. PubMed PMID: 22155803.

977 A238. Kiray A, Ergur I, Tayefi H, Bagriyanik HA, Bacakoglu AK. Anatomical  
978 evaluation of the superficial veins of the upper extremity as graft donor  
979 source in microvascular reconstructions: a cadaveric study. Acta  
980 orthopaedica et traumatologica turcica. 2013;47(6):405-10. PubMed  
981 PMID: 24509220.

982 A239. Kirikyali N, Connerton IF. Heterologous expression and kinetic  
983 characterisation of Neurospora crassa beta-xylosidase in Pichia pastoris.  
984 Enzyme and microbial technology. 2014;57:63-8. doi:  
985 10.1016/j.enzmictec.2014.02.002. PubMed PMID: 24629269.

986 A240. Klein IF, Lavallee PC, Schouman-Claeys E, Amarenco P. High-resolution  
987 MRI identifies basilar artery plaques in paramedian pontine infarct.

988 Neurology. 2005;64(3):551-2. doi:  
989 10.1212/01.WNL.0000150543.61244.06. PubMed PMID: 15699395.

990 A241. Koide M, Nishizawa S, Ohta S, Yokoyama T, Namba H. Chronological  
991 changes of the contractile mechanism in prolonged vasospasm after  
992 subarachnoid hemorrhage: from protein kinase C to protein tyrosine  
993 kinase. Neurosurgery. 2002;51(6):1468-74; discussion 74-6. PubMed  
994 PMID: 12445353.

995 A242. Koliofoti EG, Gkentzi D, Varvarigou A, Trigka M, Schulpis K. Rare case of  
996 homozygous epimerase deficiency and heterozygous of duarte 2 variant.  
997 Journal of pediatric endocrinology & metabolism : JPEM. 2014. doi:  
998 10.1515/jpem-2013-0431. PubMed PMID: 24859500.

999 A243. Kolvenbach R. The role of periscopes and chimneys in complex aneurysm  
1000 cases. Journal of endovascular therapy : an official journal of the  
1001 International Society of Endovascular Specialists. 2011;18(5):661-5. doi:  
1002 10.1583/11-3504C.1. PubMed PMID: 21992636.

1003 A244. Kondo T, Oshima T, Tomita T, Fukui H, Watari J, Okada H, et al.  
1004 Prostaglandin E(2) mediates acid-induced heartburn in healthy volunteers.  
1005 American journal of physiology Gastrointestinal and liver physiology.  
1006 2013;304(6):G568-73. doi: 10.1152/ajpgi.00276.2012. PubMed PMID:  
1007 23370674.

1008 A245. Kong Y, Wang Y, Zhang JH, Wang X, Qin X. Disparities in medical  
1009 expenditure and outcomes among patients with intracranial hemorrhage  
1010 associated with different insurance statuses in southwestern China. Acta

1011 neurochirurgica Supplement. 2011;111:337-41. doi: 10.1007/978-3-7091-  
1012 0693-8\_56. PubMed PMID: 21725778.

1013 A246. Koo TK, Cohen JH, Zheng Y. Immediate effect of nimmo receptor tonus  
1014 technique on muscle elasticity, pain perception, and disability in subjects  
1015 with chronic low back pain. Journal of manipulative and physiological  
1016 therapeutics. 2012;35(1):45-53. doi: 10.1016/j.jmpt.2011.09.013. PubMed  
1017 PMID: 22036530.

1018 A247. Kramer MA, Tracy TS. Studying cytochrome P450 kinetics in drug  
1019 metabolism. Expert opinion on drug metabolism & toxicology.  
1020 2008;4(5):591-603. doi: 10.1517/17425255.4.5.591. PubMed PMID:  
1021 18484917.

1022 A248. Kravchuk ES, Gladyshev MI, Ivanova EA. Dependence of the domination  
1023 of Anabaenaflos-aquae (Lyngb.) Breb. in the phytoplankton community on  
1024 the initial abundance of akinetes. Doklady biological sciences :  
1025 proceedings of the Academy of Sciences of the USSR, Biological sciences  
1026 sections / translated from Russian. 2007;416:377-8. PubMed PMID:  
1027 18047023.

1028 A249. La Torre D. Immunobiology of beta-cell destruction. Advances in  
1029 experimental medicine and biology. 2012;771:194-218. PubMed PMID:  
1030 23393680.

1031 A250. Labuguen RH. Initial evaluation of vertigo. American family physician.  
1032 2006;73(2):244-51. PubMed PMID: 16445269.

1033 A251. Lam DK, Schmidt BL. Orofacial pain onset predicts transition to head and  
1034 neck cancer. *Pain*. 2011;152(5):1206-9. doi: 10.1016/j.pain.2011.02.009.  
1035 PubMed PMID: 21388740; PubMed Central PMCID: PMC3099418.

1036 A252. Lamas LP, Giovagnoli G, Heath MF, Jeffcott LB. Some factors affecting  
1037 the accuracy and variability of measurements of the height of ponies. *The*  
1038 *Veterinary record*. 2007;160(20):691-4. PubMed PMID: 17513835.

1039 A253. Lan C, Chen SY, Lai JS. Changes of aerobic capacity, fat ratio and  
1040 flexibility in older TCC practitioners: a five-year follow-up. *The American*  
1041 *journal of Chinese medicine*. 2008;36(6):1041-50. doi:  
1042 10.1142/S0192415X08006442. PubMed PMID: 19051334.

1043 A254. Largo-Wight E, Peterson PM, Chen WW. Perceived problem solving,  
1044 stress, and health among college students. *American journal of health*  
1045 *behavior*. 2005;29(4):360-70. PubMed PMID: 16006233.

1046 A255. Larkin M. On the rise: internships under scrutiny as supply, demand  
1047 continue to increase despite pay, hours. *Journal of the American*  
1048 *Veterinary Medical Association*. 2013;243(1):8-11. doi:  
1049 10.2460/javma.243.1.8. PubMed PMID: 23786186.

1050 A256. Lau Y, Chan KS. Influence of intimate partner violence during pregnancy  
1051 and early postpartum depressive symptoms on breastfeeding among  
1052 chinese women in Hong Kong. *Journal of midwifery & women's health*.  
1053 2007;52(2):e15-20. doi: 10.1016/j.jmwh.2006.09.001. PubMed PMID:  
1054 17336812.

1055 A257. Lauriano CM, Ghosh C, Correa NE, Klose KE. The sodium-driven flagellar  
1056 motor controls exopolysaccharide expression in *Vibrio cholerae*. *Journal of*  
1057 *bacteriology*. 2004;186(15):4864-74. doi: 10.1128/JB.186.15.4864-  
1058 4874.2004. PubMed PMID: 15262923; PubMed Central PMCID:  
1059 PMC451641.

1060 A258. Le DT, Tran TL, Duviau MP, Meyrand M, Guerardel Y, Castelain M, et al.  
1061 Unraveling the role of surface mucus-binding protein and pili in muco-  
1062 adhesion of *Lactococcus lactis*. *PloS one*. 2013;8(11):e79850. doi:  
1063 10.1371/journal.pone.0079850. PubMed PMID: 24260308; PubMed  
1064 Central PMCID: PMC3832589.

1065 A259. Lee A, Okayasu K, Wang HL. Screw- versus cement-retained implant  
1066 restorations: current concepts. *Implant dentistry*. 2010;19(1):8-15. doi:  
1067 10.1097/ID.0b013e3181bb9033. PubMed PMID: 20147811.

1068 A260. Lee HJ, Goo JM, Im JG. Rapid and irreversible cystic change of  
1069 pulmonary tuberculosis in an immunocompetent adult. *Journal of thoracic*  
1070 *imaging*. 2003;18(4):254-6. PubMed PMID: 14561913.

1071 A261. Lee J, Lim do H, Kim S, Park SH, Park JO, Park YS, et al. Phase III trial  
1072 comparing capecitabine plus cisplatin versus capecitabine plus cisplatin  
1073 with concurrent capecitabine radiotherapy in completely resected gastric  
1074 cancer with D2 lymph node dissection: the ARTIST trial. *Journal of clinical*  
1075 *oncology : official journal of the American Society of Clinical Oncology*.  
1076 2012;30(3):268-73. doi: 10.1200/JCO.2011.39.1953. PubMed PMID:  
1077 22184384.



1078 A262. Lee SY, Cho JS, Yuk DY, Moon DC, Jung JK, Yoo HS, et al. Obovatol  
1079 enhances docetaxel-induced prostate and colon cancer cell death through  
1080 inactivation of nuclear transcription factor-kappaB. Journal of  
1081 pharmacological sciences. 2009;111(2):124-36. PubMed PMID:  
1082 19834284.

1083 A263. Lee YF, Lin CC, Chen GS. Temporal course of streptozotocin-induced  
1084 diabetic polyneuropathy in rats. Neurological sciences : official journal of  
1085 the Italian Neurological Society and of the Italian Society of Clinical  
1086 Neurophysiology. 2014. doi: 10.1007/s10072-014-1848-8. PubMed PMID:  
1087 24924783.

1088 A264. Leone M, Albanese J, Tod M, Savelli V, Ragni E, Rossi D, et al.  
1089 Ceftriaxone (1 g intravenously) penetration into abdominal tissues when  
1090 administered as antibiotic prophylaxis during nephrectomy. Journal of  
1091 chemotherapy. 2003;15(2):139-42. doi: 10.1179/joc.2003.15.2.139.  
1092 PubMed PMID: 12797390.

1093 A265. Letsas KP, Filippatos GS, Kounas SP, Efremidis M, Sideris A, Kardaras F.  
1094 QT interval prolongation and Torsades de Pointes in a patient receiving  
1095 zolpidem and amiodarone. Cardiology. 2006;105(3):146-7. doi:  
1096 10.1159/000091201. PubMed PMID: 16449812.

1097 A266. Lewis G. Viscoelastic properties of injectable bone cements for  
1098 orthopaedic applications: state-of-the-art review. Journal of biomedical  
1099 materials research Part B, Applied biomaterials. 2011;98(1):171-91. doi:  
1100 10.1002/jbm.b.31835. PubMed PMID: 21504058.

1101 A267. Liao M, Kielian M. Domain III from class II fusion proteins functions as a  
1102 dominant-negative inhibitor of virus membrane fusion. *The Journal of cell*  
1103 *biology*. 2005;171(1):111-20. doi: 10.1083/jcb.200507075. PubMed PMID:  
1104 16216925; PubMed Central PMCID: PMC2171229.

1105 A268. Licker M, Diaper J, Villiger Y, Spiliopoulos A, Licker V, Robert J, et al.  
1106 Impact of intraoperative lung-protective interventions in patients  
1107 undergoing lung cancer surgery. *Critical care*. 2009;13(2):R41. doi:  
1108 10.1186/cc7762. PubMed PMID: 19317902; PubMed Central PMCID:  
1109 PMC2689485.

1110 A269. Lin WC, Liu CP, Kuo CH, Chang HY, Chang CJ, Hsieh TH, et al. The role  
1111 of the auxiliary atomic ion beam in C60(+)-Ar+ co-sputtering. *The Analyst*.  
1112 2011;136(5):941-6. doi: 10.1039/c0an00642d. PubMed PMID: 21152650.

1113 A270. Little DM, Hartley AA. Further evidence that negative priming in the Stroop  
1114 color-word task is equivalent in older and younger adults. *Psychology and*  
1115 *aging*. 2000;15(1):9-17. PubMed PMID: 10755285.

1116 A271. Liu L, Xu X, Zhuang D, Chen X, Li S. Changes in the potential multiple  
1117 cropping system in response to climate change in China from 1960-2010.  
1118 *PloS one*. 2013;8(12):e80990. doi: 10.1371/journal.pone.0080990.  
1119 PubMed PMID: 24312511; PubMed Central PMCID: PMC3849037.

1120 A272. Liu S, Zhao C, Yang C, Li X, Huang H, Liu N, et al. Gambogic acid  
1121 suppresses pressure overload cardiac hypertrophy in rats. *American*  
1122 *journal of cardiovascular disease*. 2013;3(4):227-38. PubMed PMID:  
1123 24224134; PubMed Central PMCID: PMC3819582.

1124 A273. Loewen CA, Mackler JM, Reist NE. *Drosophila* synaptotagmin I null  
1125 mutants survive to early adulthood. *Genesis*. 2001;31(1):30-6. PubMed  
1126 PMID: 11668675.

1127 A274. Lombardo Y, Scopelliti A, Cammareri P, Todaro M, Iovino F, Ricci-Vitiani  
1128 L, et al. Bone morphogenetic protein 4 induces differentiation of colorectal  
1129 cancer stem cells and increases their response to chemotherapy in mice.  
1130 *Gastroenterology*. 2011;140(1):297-309. doi:  
1131 10.1053/j.gastro.2010.10.005. PubMed PMID: 20951698.

1132 A275. Lomholt JF, Nolting D, Hansen BF, Stoltze K, Kjaer I. The pre-natal  
1133 development and osseous growth of the human cerebellar field.  
1134 *Orthodontics & craniofacial research*. 2003;6(3):143-54. PubMed PMID:  
1135 12962197.

1136 A276. Lorenzana R, Coustan-Smith E, Antillon F, Ribeiro RC, Campana D.  
1137 Simple methods for the rapid exchange of flow cytometric data between  
1138 remote centers. *Leukemia*. 2000;14(2):336-7. PubMed PMID: 10673754.

1139 A277. Lowe AW, Moseley RH. Noninvasive assessment of longterm outcomes in  
1140 patients with nonalcoholic fatty liver disease. *Gastroenterology*.  
1141 2013;145(4):699-700. PubMed PMID: 24187687.

1142 A278. Lowenberg B, Morgan G, Ossenkoppele GJ, Burnett AK, Zachee P,  
1143 Duhrsen U, et al. Phase I/II clinical study of Tosedostat, an inhibitor of  
1144 aminopeptidases, in patients with acute myeloid leukemia and  
1145 myelodysplasia. *Journal of clinical oncology : official journal of the*

1146 American Society of Clinical Oncology. 2010;28(28):4333-8. doi:  
1147 10.1200/JCO.2009.27.6295. PubMed PMID: 20733120.

1148 A279. Lu Q, Longo FM, Zhou H, Massa SM, Chen YH. Signaling through Rho  
1149 GTPase pathway as viable drug target. Current medicinal chemistry.  
1150 2009;16(11):1355-65. PubMed PMID: 19355891; PubMed Central PMCID:  
1151 PMC3829470.

1152 A280. Lv SQ, Zhang KB, Zhang EE, Gao FY, Yin CL, Huang CJ, et al. Antitumor  
1153 efficiency of the cytosine deaminase/5-fluorocytosine suicide gene therapy  
1154 system on malignant gliomas: an in vivo study. Medical science monitor :  
1155 international medical journal of experimental and clinical research.  
1156 2009;15(1):BR13-20. PubMed PMID: 19114960.

1157 A281. Lyell DJ, Pullen K, Fuh K, Zamah AM, Caughey AB, Benitz W, et al. Daily  
1158 compared with 8-hour gentamicin for the treatment of intrapartum  
1159 chorioamnionitis: a randomized controlled trial. Obstetrics and gynecology.  
1160 2010;115(2 Pt 1):344-9. doi: 10.1097/AOG.0b013e3181cb5c0e. PubMed  
1161 PMID: 20093909.

1162 A282. Lyons WS. Is it time to change the rules for resuscitation? American  
1163 journal of surgery. 2002;184(6):658; author reply -60. PubMed PMID:  
1164 12488208.

1165 A283. Mackenbach JP. Streets of Paris, sunflower seeds, and Nobel prizes.  
1166 Reflections on the quantitative paradigm of public health. Journal of  
1167 epidemiology and community health. 2004;58(9):734-7. doi:

1168 10.1136/jech.2003.016139. PubMed PMID: 15310796; PubMed Central  
1169 PMCID: PMC1732889.

1170 A284. Mahnke YD, Schirrmacher V. A novel tumour model system for the study  
1171 of long-term protective immunity and immune T cell memory. Cellular  
1172 immunology. 2003;221(2):89-99. PubMed PMID: 12747949.

1173 A285. Maine GT, Stricker R, Schuler M, Spesard J, Brojanac S, Iriarte B, et al.  
1174 Development and clinical evaluation of a recombinant-antigen-based  
1175 cytomegalovirus immunoglobulin M automated immunoassay using the  
1176 Abbott AxSYM analyzer. Journal of clinical microbiology. 2000;38(4):1476-  
1177 81. PubMed PMID: 10747129; PubMed Central PMCID: PMC86469.

1178 A286. Mandell BF. Why effective drugs don't work for everyone. Cleveland Clinic  
1179 journal of medicine. 2007;74(1):3. PubMed PMID: 17373341.

1180 A287. Mao HZ, Roussos ET, Peterfy M. Genetic analysis of the diabetes-prone  
1181 C57BLKS/J mouse strain reveals genetic contribution from multiple  
1182 strains. Biochimica et biophysica acta. 2006;1762(4):440-6. doi:  
1183 10.1016/j.bbadis.2006.01.002. PubMed PMID: 16481151.

1184 A288. Marathe D, Mishra KP. Radiation-induced changes in permeability in  
1185 unilamellar phospholipid liposomes. Radiation research. 2002;157(6):685-  
1186 92. PubMed PMID: 12005548.

1187 A289. Mark KS, Davis TP. Cerebral microvascular changes in permeability and  
1188 tight junctions induced by hypoxia-reoxygenation. American journal of  
1189 physiology Heart and circulatory physiology. 2002;282(4):H1485-94. doi:

1190 10.1152/ajpheart.00645.2001. PubMed PMID: 11893586; PubMed Central  
1191 PMCID: PMC3918411.

1192 A290. Marques J, Moles E, Urban P, Prohens R, Busquets MA, Sevrin C, et al.  
1193 Application of heparin as a dual agent with antimalarial and liposome  
1194 targeting activities towards Plasmodium-infected red blood cells.  
1195 Nanomedicine : nanotechnology, biology, and medicine. 2014. doi:  
1196 10.1016/j.nano.2014.06.002. PubMed PMID: 24941466.

1197 A291. Martinez E, Domingo P, Galindo MJ, Milinkovic A, Arroyo JA, Baldovi F, et  
1198 al. Risk of metabolic abnormalities in patients infected with HIV receiving  
1199 antiretroviral therapy that contains lopinavir-ritonavir. Clinical infectious  
1200 diseases : an official publication of the Infectious Diseases Society of  
1201 America. 2004;38(7):1017-23. doi: 10.1086/382531. PubMed PMID:  
1202 15034836.

1203 A292. Matsumoto T, Suzuki N, Watanabe H, Irie M, Iwata K, Anan A, et al.  
1204 Nonalcoholic steatohepatitis associated with psoriasis vulgaris. Journal of  
1205 gastroenterology. 2004;39(11):1102-5. doi: 10.1007/s00535-004-1451-5.  
1206 PubMed PMID: 15580405.

1207 A293. Mattoon D, Gupta K, Doyon J, Loll PJ, DiMaio D. Identification of the  
1208 transmembrane dimer interface of the bovine papillomavirus E5 protein.  
1209 Oncogene. 2001;20(29):3824-34. doi: 10.1038/sj.onc.1204523. PubMed  
1210 PMID: 11439346.

1211 A294. Mayer IA, Verma A, Grumbach IM, Uddin S, Lekmine F, Ravandi F, et al.  
1212 The p38 MAPK pathway mediates the growth inhibitory effects of

1213 interferon-alpha in BCR-ABL-expressing cells. The Journal of biological  
1214 chemistry. 2001;276(30):28570-7. doi: 10.1074/jbc.M011685200. PubMed  
1215 PMID: 11353767.

1216 A295. McClintick J, Edenberg HJ. BlastReport: a perl script to facilitate the use of  
1217 sequence databases for mapping and clustering. BioTechniques.  
1218 2000;29(6):1272-6. PubMed PMID: 11126131.

1219 A296. Meduri B, Vergeau BM, Dumont JL, Tuszynski T, Dritsas S, Dhumane P,  
1220 et al. Endoscopic ultrasound-guided fine needle aspiration and endoscopic  
1221 biliary drainage following closure of a duodenal perforation with an over-  
1222 the-scope clip. Endoscopy. 2014;46 Suppl 1 UCTN:E69-70. doi:  
1223 10.1055/s-0033-1359186. PubMed PMID: 24523190.

1224 A297. Mehta PK, Baer J, Nell C, Sperling LS. Low-density lipoprotein apheresis  
1225 as a treatment option for hyperlipidemia. Current treatment options in  
1226 cardiovascular medicine. 2009;11(4):279-88. PubMed PMID: 19627661.

1227 A298. Meirer R, Huemer GM, Shafighi M, Kamelger FS, Hussl H, Piza-Katzer H.  
1228 Sciatic nerve enlargement in the Klippel-Trenaunay-Weber syndrome.  
1229 British journal of plastic surgery. 2005;58(4):565-8. doi:  
1230 10.1016/j.bjps.2004.11.005. PubMed PMID: 15897045.

1231 A299. Miampamba M, Germano PM, Arli S, Wong HH, Scott D, Tache Y, et al.  
1232 Expression of pituitary adenylate cyclase-activating polypeptide and  
1233 PACAP type 1 receptor in the rat gastric and colonic myenteric neurons.  
1234 Regulatory peptides. 2002;105(3):145-54. PubMed PMID: 11959368.

1235 A300. Mihm LM, Quick VA, Brumfield JA, Connors AF, Jr., Finnerty JJ. The  
1236 accuracy of endometrial biopsy and saline sonohysterography in the  
1237 determination of the cause of abnormal uterine bleeding. American journal  
1238 of obstetrics and gynecology. 2002;186(5):858-60. PubMed PMID:  
1239 12015495.

1240 A301. Mills E, Ernst E, Singh R, Ross C, Wilson K. Health food store  
1241 recommendations: implications for breast cancer patients. Breast cancer  
1242 research : BCR. 2003;5(6):R170-4. doi: 10.1186/bcr636. PubMed PMID:  
1243 14580252; PubMed Central PMCID: PMC314402.

1244 A302. Milward DV. Lonely nights in long-term care. Age and ageing.  
1245 2001;30(3):271-2. PubMed PMID: 11443035.

1246 A303. Moghadam MN, Banshi M, Javar MA, Amiresmaili M, Ganjavi S. Iranian  
1247 Household Financial Protection against Catastrophic Health Care  
1248 Expenditures. Iranian journal of public health. 2012;41(9):62-70. PubMed  
1249 PMID: 23193508; PubMed Central PMCID: PMC3494217.

1250 A304. Mohammad Alizadeh AH, Afzali ES, Mousavi M, Moaddab Y, Zali MR.  
1251 Endoscopic retrograde cholangiopancreatography outcome from a single  
1252 referral center in Iran. Hepatobiliary & pancreatic diseases international :  
1253 HBPD INT. 2010;9(4):428-32. PubMed PMID: 20688609.

1254 A305. Mok KY, Koutsis G, Schottlaender LV, Polke J, Panas M, Houlden H. High  
1255 frequency of the expanded C9ORF72 hexanucleotide repeat in familial  
1256 and sporadic Greek ALS patients. Neurobiology of aging. 2012;33(8):1851



1257 e1-5. doi: 10.1016/j.neurobiolaging.2012.02.021. PubMed PMID:  
1258 22445326; PubMed Central PMCID: PMC3657168.

1259 A306. Molardi A, Nicolini F, Beghi C, Agostinelli A, Gherli T. Aortic valve  
1260 replacement with right thoracotomy in a patient with sternal metastasis  
1261 from renal carcinoma. *Acta bio-medica : Atenei Parmensis*.  
1262 2009;80(2):150-2. PubMed PMID: 19848053.

1263 A307. Moonka D, Castillo E, Kumer S, Abouljoud M, Divine G, Pelletier S. Impact  
1264 of model for end-stage liver disease on patient survival and disease-free  
1265 survival in patients receiving liver transplantation for hepatocellular  
1266 carcinoma. *Transplantation proceedings*. 2009;41(1):216-8. doi:  
1267 10.1016/j.transproceed.2008.09.060. PubMed PMID: 19249517.

1268 A308. Morvay Z, Szabo E, Tiszlavicz L, Furak J, Trojan I, Palko A. Thoracic core  
1269 needle biopsy using ultrasound guidance. *Ultrasound quarterly*.  
1270 2001;17(2):113-21. PubMed PMID: 12973082.

1271 A309. Moskvin V, Cheng CW, Fanelli L, Zhao L, Das IJ. A semi-empirical model  
1272 for the therapeutic range shift estimation caused by inhomogeneities in  
1273 proton beam therapy. *Journal of applied clinical medical physics /*  
1274 *American College of Medical Physics*. 2012;13(2):3631. doi:  
1275 10.1120/jacmp.v13i2.3631. PubMed PMID: 22402381.

1276 A310. Motoyama T, Yabunaka H, Miyoshi H. Essential structural factors of  
1277 acetogenins, potent inhibitors of mitochondrial complex I. *Bioorganic &*  
1278 *medicinal chemistry letters*. 2002;12(16):2089-92. PubMed PMID:  
1279 12127510.

- 1280 A311. Mulroy J. Chronic obstructive pulmonary disease in women. Dimensions  
1281 of critical care nursing : DCCN. 2005;24(1):1-18; quiz 9-20. PubMed  
1282 PMID: 15714066.
- 1283 A312. Nagasaka H, Yorifuji T, Egawa H, Kikuta H, Tanaka K, Kobayashi K.  
1284 Successful living-donor liver transplantation from an asymptomatic carrier  
1285 mother in ornithine transcarbamylase deficiency. The Journal of pediatrics.  
1286 2001;138(3):432-4. doi: 10.1067/mpd.2001.111318. PubMed PMID:  
1287 11241058.
- 1288 A313. Naito M, Itoh M. Patterns of infiltration of lymphocytes into the testis under  
1289 normal and pathological conditions in mice. American journal of  
1290 reproductive immunology. 2008;59(1):55-61. doi: 10.1111/j.1600-  
1291 0897.2007.00556.x. PubMed PMID: 18154596.
- 1292 A314. Namgaladze D, Kollas A, Brune B. Oxidized LDL attenuates apoptosis in  
1293 monocytic cells by activating ERK signaling. Journal of lipid research.  
1294 2008;49(1):58-65. doi: 10.1194/jlr.M700100-JLR200. PubMed PMID:  
1295 17890680.
- 1296 A315. Nardone A, Grasso M, Tarantola J, Corna S, Schieppati M. Postural  
1297 coordination in elderly subjects standing on a periodically moving platform.  
1298 Archives of physical medicine and rehabilitation. 2000;81(9):1217-23. doi:  
1299 10.1053/apmr.2000.6286. PubMed PMID: 10987165.
- 1300 A316. Nasreen N, Mohammed KA, Lai Y, Antony VB. Receptor EphA2 activation  
1301 with ephrinA1 suppresses growth of malignant mesothelioma (MM).

1302 Cancer letters. 2007;258(2):215-22. doi: 10.1016/j.canlet.2007.09.005.  
1303 PubMed PMID: 17949899.

1304 A317. Nazal L, Cardenas A. Prognostic markers in patients with ascites and  
1305 hepatorenal syndrome. Disease markers. 2011;31(3):139-46. doi:  
1306 10.3233/DMA-2011-0836. PubMed PMID: 22045399; PubMed Central  
1307 PMCID: PMC3826924.

1308 A318. Niederberger C. Re: Effect of an isotonic lubricant on sperm collection and  
1309 sperm quality. The Journal of urology. 2013;190(5):1843. doi:  
1310 10.1016/j.juro.2013.07.076. PubMed PMID: 24120809.

1311 A319. Nielsen ME, Rasmussen IA, Kristensen SG, Christensen ST, Mollgard K,  
1312 Wreford Andersen E, et al. In human granulosa cells from small antral  
1313 follicles, androgen receptor mRNA and androgen levels in follicular fluid  
1314 correlate with FSH receptor mRNA. Molecular human reproduction.  
1315 2011;17(1):63-70. doi: 10.1093/molehr/gaq073. PubMed PMID:  
1316 20843821.

1317 A320. Nikiforovich GV, Frieden C. The search for local native-like nucleation  
1318 centers in the unfolded state of beta -sheet proteins. Proceedings of the  
1319 National Academy of Sciences of the United States of America.  
1320 2002;99(16):10388-93. doi: 10.1073/pnas.162362199. PubMed PMID:  
1321 12140369; PubMed Central PMCID: PMC124924.

1322 A321. Ninomiya I, Osugi H, Fujimura T, Fushida S, Okamoto K, Maruzen S, et al.  
1323 Thoracoscopic esophagectomy with extended lymph node dissection in  
1324 the left lateral position: technical feasibility and oncologic outcomes.

1325 Diseases of the esophagus : official journal of the International Society for  
1326 Diseases of the Esophagus / ISDE. 2014;27(2):159-67. doi:  
1327 10.1111/dote.12071. PubMed PMID: 23551804.

1328 A322. Nithsdale V, Davies J, Croucher P. Psychosis and the experience of  
1329 employment. Journal of occupational rehabilitation. 2008;18(2):175-82.  
1330 doi: 10.1007/s10926-008-9131-6. PubMed PMID: 18401690.

1331 A323. Noel S, Dua J, Kaushal G. An 81 year old man with a blistering rash. Bmj.  
1332 2013;346:f522. doi: 10.1136/bmj.f522. PubMed PMID: 23369776.

1333 A324. O'Shea B. Post-traumatic stress disorder: A review for the general  
1334 psychiatrist. International journal of psychiatry in clinical practice.  
1335 2001;5(1):11-8. doi: 10.1080/136515001300225141. PubMed PMID:  
1336 24936990.

1337 A325. Odum CU, Anorlu RI, Dim SI, Oyekan TO. Pregnancy outcome in HbSS-  
1338 sickle cell disease in Lagos, Nigeria. West African journal of medicine.  
1339 2002;21(1):19-23. PubMed PMID: 12083064.

1340 A326. Oehler DZ, Robert F, Mostefaoui S, Meibom A, Selo M, McKay DS.  
1341 Chemical mapping of proterozoic organic matter at submicron spatial  
1342 resolution. Astrobiology. 2006;6(6):838-50. doi: 10.1089/ast.2006.6.838.  
1343 PubMed PMID: 17155884.

1344 A327. Okumura M, Iwata K, Yasuda K, Inoue K, Shinoda M, Honda K, et al.  
1345 Alternation of gene expression in trigeminal ganglion neurons following  
1346 complete Freund's adjuvant or capsaicin injection into the rat face. Journal

1347 of molecular neuroscience : MN. 2010;42(2):200-9. doi: 10.1007/s12031-  
1348 010-9348-7. PubMed PMID: 20349343.

1349 A328. Otis-Green S, Ferrell B, Borneman T, Puchalski C, Uman G, Garcia A.  
1350 Integrating spiritual care within palliative care: an overview of nine  
1351 demonstration projects. *Journal of palliative medicine*. 2012;15(2):154-62.  
1352 doi: 10.1089/jpm.2011.0211. PubMed PMID: 22304654.

1353 A329. Partridge AH, Elmore JG, Saslow D, McCaskill-Stevens W, Schnitt SJ.  
1354 Challenges in ductal carcinoma in situ risk communication and decision-  
1355 making: report from an American Cancer Society and National Cancer  
1356 Institute workshop. *CA: a cancer journal for clinicians*. 2012;62(3):203-10.  
1357 doi: 10.3322/caac.21140. PubMed PMID: 22488610.

1358 A330. Patel MR, Dai D, Hernandez AF, Douglas PS, Messenger J, Garratt KN,  
1359 et al. Prevalence and predictors of nonobstructive coronary artery disease  
1360 identified with coronary angiography in contemporary clinical practice.  
1361 *American heart journal*. 2014;167(6):846-52 e2. doi:  
1362 10.1016/j.ahj.2014.03.001. PubMed PMID: 24890534.

1363 A331. Pavlikakis GE, Tshrintzis VA. A quantitative method for accounting human  
1364 opinion, preferences and perceptions in ecosystem management. *Journal*  
1365 *of environmental management*. 2003;68(2):193-205. PubMed PMID:  
1366 12781759.

1367 A332. Pawlik TM, Perry A, Strom EA, Babiera GV, Buchholz TA, Singletary E, et  
1368 al. Potential applicability of balloon catheter-based accelerated partial

1369 breast irradiation after conservative surgery for breast carcinoma. *Cancer*.  
1370 2004;100(3):490-8. doi: 10.1002/cncr.11939. PubMed PMID: 14745864.

1371 A333. Pedraza-Chaverri J, Gil-Ortiz M, Albarran G, Barbachano-Esparza L,  
1372 Menjivar M, Medina-Campos ON. Garlic's ability to prevent in vitro Cu<sup>2+</sup>-  
1373 induced lipoprotein oxidation in human serum is preserved in heated  
1374 garlic: effect unrelated to Cu<sup>2+</sup>-chelation. *Nutrition journal*. 2004;3:10. doi:  
1375 10.1186/1475-2891-3-10. PubMed PMID: 15341661; PubMed Central  
1376 PMCID: PMC519022.

1377 A334. Pellegrini N, Serafini M, Colombi B, Del Rio D, Salvatore S, Bianchi M, et  
1378 al. Total antioxidant capacity of plant foods, beverages and oils consumed  
1379 in Italy assessed by three different in vitro assays. *The Journal of nutrition*.  
1380 2003;133(9):2812-9. PubMed PMID: 12949370.

1381 A335. Pencina MJ. Caution is needed in the interpretation of added value of  
1382 biomarkers analyzed in matched case control studies. *Clinical chemistry*.  
1383 2012;58(8):1176-8. doi: 10.1373/clinchem.2012.188383. PubMed PMID:  
1384 22730448.

1385 A336. Peng X, Li P, Shi Y. Synthesis of (+)-ambrisentan via chiral ketone-  
1386 catalyzed asymmetric epoxidation. *The Journal of organic chemistry*.  
1387 2012;77(1):701-3. doi: 10.1021/jo201927m. PubMed PMID: 22098088.

1388 A337. Penner GB, Steele MA, Aschenbach JR, McBride BW. Ruminant Nutrition  
1389 Symposium: Molecular adaptation of ruminal epithelia to highly  
1390 fermentable diets. *Journal of animal science*. 2011;89(4):1108-19. doi:  
1391 10.2527/jas.2010-3378. PubMed PMID: 20971890.

- 1392 A338. Peppe A, Pierantozzi M, Altibrandi MG, Giacomini P, Stefani A, Bassi A, et  
1393 al. Bilateral GPi DBS is useful to reduce abnormal involuntary movements  
1394 in advanced Parkinson's disease patients, but its action is related to  
1395 modality and site of stimulation. *European journal of neurology : the official*  
1396 *journal of the European Federation of Neurological Societies.*  
1397 2001;8(6):579-86. PubMed PMID: 11784342.
- 1398 A339. Peres WA, Lento DF, Baluz K, Ramalho A. Phase angle as a nutritional  
1399 evaluation tool in all stages of chronic liver disease. *Nutricion hospitalaria.*  
1400 2012;27(6):2072-8. doi: 10.3305/nh.2012.27.6.6015. PubMed PMID:  
1401 23588459.
- 1402 A340. Peters M, Manning JT, Reimers S. The effects of sex, sexual orientation,  
1403 and digit ratio (2D:4D) on mental rotation performance. *Archives of sexual*  
1404 *behavior.* 2007;36(2):251-60. doi: 10.1007/s10508-006-9166-8. PubMed  
1405 PMID: 17394056.
- 1406 A341. Pfeifer GP, Besaratinia A. UV wavelength-dependent DNA damage and  
1407 human non-melanoma and melanoma skin cancer. *Photochemical &*  
1408 *photobiological sciences : Official journal of the European Photochemistry*  
1409 *Association and the European Society for Photobiology.* 2012;11(1):90-7.  
1410 doi: 10.1039/c1pp05144j. PubMed PMID: 21804977; PubMed Central  
1411 PMCID: PMC3289542.
- 1412 A342. Philopoulos D. Application of criteria developed by the Task Force on  
1413 Neonatal Encephalopathy and Cerebral Palsy to acutely asphyxiated

1414 neonates. Obstetrics and gynecology. 2012;119(5):1056; author reply -7.  
1415 doi: 10.1097/AOG.0b013e318254268a. PubMed PMID: 22525923.

1416 A343. Pioli PA, Weaver LK, Schaefer TM, Wright JA, Wira CR, Guyre PM.  
1417 Lipopolysaccharide-induced IL-1 beta production by human uterine  
1418 macrophages up-regulates uterine epithelial cell expression of human  
1419 beta-defensin 2. Journal of immunology. 2006;176(11):6647-55. PubMed  
1420 PMID: 16709823.

1421 A344. Poland D. Intermediates in the melting transitions of aluminum  
1422 nanoclusters. The Journal of chemical physics. 2007;126(5):054507. doi:  
1423 10.1063/1.2432121. PubMed PMID: 17302485.

1424 A345. Poles MA, Fuerst M, McGowan I, Elliott J, Rezaei A, Mark D, et al. HIV-  
1425 related diarrhea is multifactorial and fat malabsorption is commonly  
1426 present, independent of HAART. The American journal of  
1427 gastroenterology. 2001;96(6):1831-7. doi: 10.1111/j.1572-  
1428 0241.2001.03879.x. PubMed PMID: 11421246.

1429 A346. Porel M, Chuang CH, Burda C, Ramamurthy V. Ultrafast photoinduced  
1430 electron transfer between an incarcerated donor and a free acceptor in  
1431 aqueous solution. Journal of the American Chemical Society.  
1432 2012;134(36):14718-21. doi: 10.1021/ja3067594. PubMed PMID:  
1433 22931120.

1434 A347. Prugh J, Zeppieri G, Jr., George SZ. Impact of psychosocial factors, pain,  
1435 and functional limitations on throwing athletes who return to sport following  
1436 elbow injuries: a case series. Physiotherapy theory and practice.



1437 2012;28(8):633-40. doi: 10.3109/09593985.2012.666632. PubMed PMID:  
1438 22432794.

1439 A348. Puckett RL, Moore SA, Winder TL, Willer T, Romansky SG, Covault KK, et  
1440 al. Further evidence of Fukutin mutations as a cause of childhood onset  
1441 limb-girdle muscular dystrophy without mental retardation. *Neuromuscular*  
1442 *disorders : NMD*. 2009;19(5):352-6. doi: 10.1016/j.nmd.2009.03.001.  
1443 PubMed PMID: 19342235; PubMed Central PMCID: PMC2698593.

1444 A349. Puente A, Diaz RJ. Is it possible to assess the ecological status of highly  
1445 stressed natural estuarine environments using macroinvertebrates  
1446 indices? *Marine pollution bulletin*. 2008;56(11):1880-9. doi:  
1447 10.1016/j.marpolbul.2008.07.016. PubMed PMID: 18790507.

1448 A350. Qian X, Shen G, Wang Z, Guo C, Liu Y, Lei Z, et al. Co-composting of  
1449 livestock manure with rice straw: characterization and establishment of  
1450 maturity evaluation system. *Waste management*. 2014;34(2):530-5. doi:  
1451 10.1016/j.wasman.2013.10.007. PubMed PMID: 24188923.

1452 A351. Qin T, Zajaczkowski W, Pisula W, Baumgarten M, Chen M, Gao M, et al.  
1453 Tailored donor-acceptor polymers with an A-D1-A-D2 structure: controlling  
1454 intermolecular interactions to enable enhanced polymer photovoltaic  
1455 devices. *Journal of the American Chemical Society*. 2014;136(16):6049-  
1456 55. doi: 10.1021/ja500935d. PubMed PMID: 24697300.

1457 A352. Qiu S, Aldinger KA, Levitt P. Modeling of autism genetic variations in mice:  
1458 focusing on synaptic and microcircuit dysfunctions. *Developmental*

1459 neuroscience. 2012;34(2-3):88-100. doi: 10.1159/000336644. PubMed  
1460 PMID: 22572629.

1461 A353. Quirion E. Filgrastim and pegfilgrastim use in patients with neutropenia.  
1462 Clinical journal of oncology nursing. 2009;13(3):324-8. doi:  
1463 10.1188/09.CJON.324-328. PubMed PMID: 19502191.

1464 A354. Rahel FJ. Homogenization of fish faunas across the United States.  
1465 Science. 2000;288(5467):854-6. PubMed PMID: 10797007.

1466 A355. Rahman Z, Zidan AS, Khan MA. Non-destructive methods of  
1467 characterization of risperidone solid lipid nanoparticles. European journal  
1468 of pharmaceutics and biopharmaceutics : official journal of  
1469 Arbeitsgemeinschaft fur Pharmazeutische Verfahrenstechnik eV.  
1470 2010;76(1):127-37. doi: 10.1016/j.ejpb.2010.05.003. PubMed PMID:  
1471 20470882.

1472 A356. Rajanikanth BR, Rao KS, Sharma SM, Rajendra Prasad B. Assessment of  
1473 deformities of the lip and nose in cleft lip alveolus and palate patients by a  
1474 rating scale. Journal of maxillofacial and oral surgery. 2012;11(1):38-46.  
1475 doi: 10.1007/s12663-011-0298-6. PubMed PMID: 23449402; PubMed  
1476 Central PMCID: PMC3319831.

1477 A357. Ram CV, Fenves A. Clinical pharmacology of antihypertensive drugs.  
1478 Cardiology clinics. 2002;20(2):265-80. PubMed PMID: 12119800.

1479 A358. Reeuwijk KG, de Wind A, Westerman MJ, Ybema JF, van der Beek AJ,  
1480 Geuskens GA. 'All those things together made me retire': qualitative study  
1481 on early retirement among Dutch employees. BMC public health.

1482 2013;13(1):516. doi: 10.1186/1471-2458-13-516. PubMed PMID:  
1483 23714371; PubMed Central PMCID: PMC3674915.

1484 A359. Ren Q, Zhang Z, Zhao J. Effect on information transfer of synaptic pruning  
1485 driven by spike-timing-dependent plasticity. *Physical review E, Statistical,*  
1486 *nonlinear, and soft matter physics.* 2012;85(2 Pt 1):022901. PubMed  
1487 PMID: 22463266.

1488 A360. Ricci A, Marella GL, Apostol MA. A new experimental approach to  
1489 computer-aided face/skull identification in forensic anthropology. *The*  
1490 *American journal of forensic medicine and pathology.* 2006;27(1):46-9.  
1491 doi: 10.1097/01.paf.0000202809.96283.88. PubMed PMID: 16501348.

1492 A361. Riordan T, Cartwright K, Cunningham R, Logan M, Wright P. A survey of  
1493 time management and particular tasks undertaken by consultant  
1494 microbiologists in the UK. *Journal of clinical pathology.* 2007;60(5):540-4.  
1495 doi: 10.1136/jcp.2005.033985. PubMed PMID: 16714398; PubMed  
1496 Central PMCID: PMC1994525.

1497 A362. Ritz BW. Supplementation with active hexose correlated compound  
1498 increases survival following infectious challenge in mice. *Nutrition reviews.*  
1499 2008;66(9):526-31. doi: 10.1111/j.1753-4887.2008.00085.x. PubMed  
1500 PMID: 18752476.

1501 A363. Roberts DC, Gabriele A, Zimmer BA. Conflation of cocaine seeking and  
1502 cocaine taking responses in IV self-administration experiments in rats:  
1503 methodological and interpretational considerations. *Neuroscience and*  
1504 *biobehavioral reviews.* 2013;37(9 Pt A):2026-36. doi:

1505 10.1016/j.neubiorev.2013.04.017. PubMed PMID: 23669047; PubMed  
1506 Central PMCID: PMC3838507.

1507 A364. Roberts H. Experiences in rural Kenya: Addressing lack of knowledge.  
1508 Community eye health / International Centre for Eye Health.  
1509 2012;25(78):28. PubMed PMID: 23139447; PubMed Central PMCID:  
1510 PMC3483606.

1511 A365. Rojas DB, de Andrade RB, Gemelli T, Oliveira LS, Campos AG, Dutra-  
1512 Filho CS, et al. Effect of histidine administration to female rats during  
1513 pregnancy and lactation on enzymes activity of phosphoryltransfer  
1514 network in cerebral cortex and hippocampus of the offspring. Metabolic  
1515 brain disease. 2012;27(4):595-603. doi: 10.1007/s11011-012-9319-5.  
1516 PubMed PMID: 22638695.

1517 A366. Roner MR, Sprayberry J, Spinks M, Dhanji S. Antiviral activity obtained  
1518 from aqueous extracts of the Chilean soapbark tree (*Quillaja saponaria*  
1519 *Molina*). The Journal of general virology. 2007;88(Pt 1):275-85. doi:  
1520 10.1099/vir.0.82321-0. PubMed PMID: 17170461.

1521 A367. Rosen HR, Ribeiro RR, Weinberger L, Wolf S, Chung M, Gretch DR, et al.  
1522 Early hepatitis C viral kinetics correlate with long-term outcome in patients  
1523 receiving high dose induction followed by combination interferon and  
1524 ribavirin therapy. Journal of hepatology. 2002;37(1):124-30. PubMed  
1525 PMID: 12076871.

1526 A368. Rosen SD, Paulesu E, Wise RJ, Camici PG. Central neural contribution to  
1527 the perception of chest pain in cardiac syndrome X. Heart.

1528 2002;87(6):513-9. PubMed PMID: 12010930; PubMed Central PMCID:  
1529 PMC1767119.

1530 A369. Rowe LA, Geddie ML, Alexander OB, Matsumura I. A comparison of  
1531 directed evolution approaches using the beta-glucuronidase model  
1532 system. *Journal of molecular biology*. 2003;332(4):851-60. PubMed PMID:  
1533 12972256.

1534 A370. Ruijs CD, Kerkhof AJ, van der Wal G, Onwuteaka-Philipsen BD.  
1535 Symptoms, unbearable and the nature of suffering in terminal cancer  
1536 patients dying at home: a prospective primary care study. *BMC family  
1537 practice*. 2013;14:201. doi: 10.1186/1471-2296-14-201. PubMed PMID:  
1538 24373224; PubMed Central PMCID: PMC3877870.

1539 A371. Russold M, Jarvis JC. Implantable stimulator featuring multiple programs,  
1540 adjustable stimulation amplitude and bi-directional communication for  
1541 implantation in mice. *Medical & biological engineering & computing*.  
1542 2007;45(7):695-9. doi: 10.1007/s11517-007-0190-1. PubMed PMID:  
1543 17541669.

1544 A372. Sabadini E, Egidio Fdo C, Cosgrove T. More on polypseudorotaxanes  
1545 formed between poly(ethylene glycol) and alpha-cyclodextrin. *Langmuir* :  
1546 the ACS journal of surfaces and colloids. 2013;29(15):4664-9. doi:  
1547 10.1021/la304910v. PubMed PMID: 23510502.

1548 A373. Sadhu S, Patra A. Donor-acceptor systems: energy transfer from CdS  
1549 quantum dots/rods to Nile Red dye. *Chemphyschem* : a European journal

1550 of chemical physics and physical chemistry. 2008;9(14):2052-8. doi:  
1551 10.1002/cphc.200800298. PubMed PMID: 18756556.

1552 A374. Sahasrabuddhe VV, Gravitt PE, Dunn ST, Brown D, Allen RA, Eby YJ, et  
1553 al. Comparison of human papillomavirus detections in urine, vulvar, and  
1554 cervical samples from women attending a colposcopy clinic. Journal of  
1555 clinical microbiology. 2014;52(1):187-92. doi: 10.1128/JCM.01623-13.  
1556 PubMed PMID: 24197879; PubMed Central PMCID: PMC3911475.

1557 A375. Sahtout AH, Hassan MD, Shariff M. DNA fragmentation, an indicator of  
1558 apoptosis, in cultured black tiger shrimp *Penaeus monodon* infected with  
1559 white spot syndrome virus (WSSV). Diseases of aquatic organisms.  
1560 2001;44(2):155-9. doi: 10.3354/dao044155. PubMed PMID: 11324818.

1561 A376. Salamova A, Hermanson MH, Hites RA. Organophosphate and  
1562 halogenated flame retardants in atmospheric particles from a European  
1563 arctic site. Environmental science & technology. 2014;48(11):6133-40. doi:  
1564 10.1021/es500911d. PubMed PMID: 24848787.

1565 A377. Salem L, Anaya DA, Flum DR. Temporal changes in the management of  
1566 diverticulitis. The Journal of surgical research. 2005;124(2):318-23. doi:  
1567 10.1016/j.jss.2004.11.005. PubMed PMID: 15820264.

1568 A378. Sanchez M, Drechsler M, Stark H, Lipps G. DNA translocation activity of  
1569 the multifunctional replication protein ORF904 from the archaeal plasmid  
1570 pRN1. Nucleic acids research. 2009;37(20):6831-48. doi:  
1571 10.1093/nar/gkp742. PubMed PMID: 19762479; PubMed Central PMCID:  
1572 PMC2777425.

1573 A379. Sanson M, Laigle-Donadey F, Benouaich-Amiel A. Molecular changes in  
1574 brain tumors: prognostic and therapeutic impact. *Current opinion in*  
1575 *oncology*. 2006;18(6):623-30. doi: 10.1097/01.cco.0000245322.11787.72.  
1576 PubMed PMID: 16988585.

1577 A380. Santana I, Duro D, Freitas S, Alves L, Simoes MR. The Clock Drawing  
1578 Test: Portuguese norms, by age and education, for three different scoring  
1579 systems. *Archives of clinical neuropsychology : the official journal of the*  
1580 *National Academy of Neuropsychologists*. 2013;28(4):375-87. doi:  
1581 10.1093/arclin/act016. PubMed PMID: 23518874.

1582 A381. Sari I, Uslu N, Gorgulu S, Nurkalem Z, Eren M. Inferior myocardial  
1583 infarction and extensive atherosclerosis in a patient with double right  
1584 coronary artery. *International journal of cardiology*. 2006;111(2):321-3. doi:  
1585 10.1016/j.ijcard.2005.11.028. PubMed PMID: 16413074.

1586 A382. Sasaki T, Nagata Y, Sugiyama K. Nasolacrimal duct obstruction classified  
1587 by dacryoendoscopy and treated with inferior meatal dacryorhinotomy.  
1588 Part I: Positional diagnosis of primary nasolacrimal duct obstruction with  
1589 dacryoendoscope. *American journal of ophthalmology*. 2005;140(6):1065-  
1590 9. doi: 10.1016/j.ajo.2005.07.038. PubMed PMID: 16376652.

1591 A383. Sayer EJ. Using experimental manipulation to assess the roles of leaf litter  
1592 in the functioning of forest ecosystems. *Biological reviews of the*  
1593 *Cambridge Philosophical Society*. 2006;81(1):1-31. doi:  
1594 10.1017/S1464793105006846. PubMed PMID: 16460580.

1595 A384. Schaefer SA, Buitrago-Suarez UA. Odontode morphology and skin  
1596 surface features of Andean astroblepid catfishes (Siluriformes,  
1597 Astroblepidae). *Journal of morphology*. 2002;254(2):139-48. doi:  
1598 10.1002/jmor.10024. PubMed PMID: 12353298.

1599 A385. Scharer MA, Eliot AC, Grutter MG, Capitani G. Structural basis for  
1600 reduced activity of 1-aminocyclopropane-1-carboxylate synthase affected  
1601 by a mutation linked to andromonoecy. *FEBS letters*. 2011;585(1):111-4.  
1602 doi: 10.1016/j.febslet.2010.11.013. PubMed PMID: 21075107.

1603 A386. Schatten H. Introduction to stem cell special section. *Microscopy and*  
1604 *microanalysis : the official journal of Microscopy Society of America,*  
1605 *Microbeam Analysis Society, Microscopical Society of Canada.*  
1606 2011;17(4):473. doi: 10.1017/S1431927611011998. PubMed PMID:  
1607 21740615.

1608 A387. Schley M, Fritzsche S, Lonneck P, Hey-Hawkins E. Soluble monometallic  
1609 salen complexes derived from O-functionalised diamines as  
1610 metalloligands for the synthesis of heterobimetallic complexes. *Dalton*  
1611 *transactions*. 2010;39(17):4090-106. doi: 10.1039/b920706f. PubMed  
1612 PMID: 20390172.

1613 A388. Schmid-Grendelmeier P, Mahe A, Ponnighaus JM, Welsh O, Stingl P,  
1614 Leppard B. Tropical dermatology. Part I. *Journal of the American*  
1615 *Academy of Dermatology*. 2002;46(4):571-83. PubMed PMID: 11907511.

1616 A389. Schopfer D, Patel V, Chiang J, Kao J. Hospitals with percutaneous  
1617 coronary intervention capability have greater adherence to established



1618 myocardial infarction guidelines. Hospital practice. 2010;38(2):9-13.  
1619 PubMed PMID: 20469608.

1620 A390. Schubert C, Rudolf M, Guldi DM, Takano Y, Mizorogi N, Herranz MA, et  
1621 al. Rates and energetics of intramolecular electron transfer processes in  
1622 conjugated metallofullerenes. Philosophical transactions Series A,  
1623 Mathematical, physical, and engineering sciences.  
1624 2013;371(1998):20120490. doi: 10.1098/rsta.2012.0490.

1625 A391. Schwab JO, Eichner G, Veit G, Schmitt H, Lewalter T, Luderitz B.  
1626 Influence of basic heart rate and sex on heart rate turbulence in healthy  
1627 subjects. Pacing and clinical electrophysiology : PACE. 2004;27(12):1625-  
1628 31. doi: 10.1111/j.1540-8159.2004.00695.x. PubMed PMID: 15613125.

1629 A392. Schwenke DW, Partridge H. Vibrational energy levels for CH4 from an ab  
1630 initio potential. Spectrochimica acta Part A, Molecular and biomolecular  
1631 spectroscopy. 2001;57(4):887-95. PubMed PMID: 11345261.

1632 A393. Scoles DR, Pflieger LT, Thai KK, Hansen ST, Dansithong W, Pulst SM.  
1633 ETS1 regulates the expression of ATXN2. Human molecular genetics.  
1634 2012;21(23):5048-65. doi: 10.1093/hmg/dds349. PubMed PMID:  
1635 22914732; PubMed Central PMCID: PMC3490512.

1636 A394. Scott JW, Acevedo HP, Sherrill L, Phan M. Responses of the rat olfactory  
1637 epithelium to retronasal air flow. Journal of neurophysiology.  
1638 2007;97(3):1941-50. doi: 10.1152/jn.01305.2006. PubMed PMID:  
1639 17215498; PubMed Central PMCID: PMC2225990.

1640 A395. Sen P, Darabi S. Compressive rendering: a rendering application of  
1641 compressed sensing. *IEEE transactions on visualization and computer*  
1642 *graphics*. 2011;17(4):487-99. doi: 10.1109/TVCG.2010.46. PubMed PMID:  
1643 21311092.

1644 A396. Sethi SK. Invited manuscript poster on renal-related education American  
1645 Society of Nephrology, Nov. 16-21, 2010. *E-pediatric nephrology in India.*  
1646 *Renal failure*. 2011;33(7):751-2. doi: 10.3109/0886022X.2011.589953.  
1647 PubMed PMID: 21787166.

1648 A397. Shafir E, Malecki M, Schernthaner G, Kiljanski J. Treatment of type 2  
1649 diabetes mellitus. Introduction. *Diabetes research and clinical practice*.  
1650 2008;82 Suppl 2:S81-2. doi: 10.1016/j.diabres.2008.09.019. PubMed  
1651 PMID: 19019474.

1652 A398. Shah KH, Verma RJ. Butyl p-hydroxybenzoic acid induces oxidative stress  
1653 in mice liver--an in vivo study. *Acta poloniae pharmaceutica*.  
1654 2011;68(6):875-9. PubMed PMID: 22125952.

1655 A399. Shah NH, Tenenbaum JD. The coming age of data-driven medicine:  
1656 translational bioinformatics' next frontier. *Journal of the American Medical*  
1657 *Informatics Association : JAMIA*. 2012;19(e1):e2-4. doi: 10.1136/amiajnl-  
1658 2012-000969. PubMed PMID: 22718035; PubMed Central PMCID:  
1659 PMC3392866.

1660 A400. Shahin AY, Ismail AM, Zahran KM, Makhlof AM. Adding phytoestrogens  
1661 to clomiphene induction in unexplained infertility patients--a randomized

1662 trial. Reproductive biomedicine online. 2008;16(4):580-8. PubMed PMID:  
1663 18413068.

1664 A401. Shalhoub J, Monaco C, Owen DR, Gauthier T, Thapar A, Leen EL, et al.  
1665 Late-phase contrast-enhanced ultrasound reflects biological features of  
1666 instability in human carotid atherosclerosis. Stroke; a journal of cerebral  
1667 circulation. 2011;42(12):3634-6. doi: 10.1161/STROKEAHA.111.631200.  
1668 PubMed PMID: 21960570.

1669 A402. Shek TW. Chondroblastoma of temporal bone. The American journal of  
1670 otology. 2000;21(4):597-8. PubMed PMID: 10912709.

1671 A403. Shi DD, Trigo FF, Semmelhack MF, Wang SS. Synthesis and biological  
1672 evaluation of bis-CNB-GABA, a photoactivatable neurotransmitter with low  
1673 receptor interference and chemical two-photon uncaging properties.  
1674 Journal of the American Chemical Society. 2014;136(5):1976-81. doi:  
1675 10.1021/ja411082f. PubMed PMID: 24422544; PubMed Central PMCID:  
1676 PMC3985807.

1677 A404. Shintani M, Takahashi Y, Tokumaru H, Kadota K, Hara H, Miyakoshi M, et  
1678 al. Response of the Pseudomonas host chromosomal transcriptome to  
1679 carriage of the IncP-7 plasmid pCAR1. Environmental microbiology.  
1680 2010;12(6):1413-26. doi: 10.1111/j.1462-2920.2009.02110.x. PubMed  
1681 PMID: 19930443.

1682 A405. Shufelt CL, Merz CN, Prentice RL, Pettinger MB, Rossouw JE, Aroda VR,  
1683 et al. Hormone therapy dose, formulation, route of delivery, and risk of  
1684 cardiovascular events in women: findings from the Women's Health

1685 Initiative Observational Study. Menopause. 2014;21(3):260-6. doi:  
1686 10.1097/GME.0b013e31829a64f9. PubMed PMID: 24045672; PubMed  
1687 Central PMCID: PMC3872264.

1688 A406. Siam EM. Office microlaparoscopic intrafallopian transfer of day one  
1689 zygote versus day three embryo transfer after previous failed ICSI trials.  
1690 African journal of reproductive health. 2011;15(2):153-61. PubMed PMID:  
1691 22590901.

1692 A407. Simpson K, Leyendecker P, Hopp M, Muller-Lissner S, Lowenstein O, De  
1693 Andres J, et al. Fixed-ratio combination oxycodone/naloxone compared  
1694 with oxycodone alone for the relief of opioid-induced constipation in  
1695 moderate-to-severe noncancer pain. Current medical research and  
1696 opinion. 2008;24(12):3503-12. doi: 10.1185/03007990802584454.  
1697 PubMed PMID: 19032132.

1698 A408. Sinkin RA, Fisher SG, Dozier A, Dye TD. Effect of managed care on  
1699 perinatal transports for the publicly funded in upstate New York. Journal of  
1700 perinatology : official journal of the California Perinatal Association.  
1701 2005;25(2):79-85. doi: 10.1038/sj.jp.7211213. PubMed PMID: 15496969.

1702 A409. Soda M, Ishikura T, Nakamura H, Wakabayashi Y, Kimura T. Magnetic  
1703 ordering in relation to the room-temperature magnetoelectric effect of  
1704 Sr3Co2Fe24O41. Physical review letters. 2011;106(8):087201. PubMed  
1705 PMID: 21405595.

1706 A410. Solcher SC, Langhofer S, Layes D, Dryer LA, Yelton S, Long C. Fistulae  
1707 are first at Kansas dialysis services. Nephrology nursing journal : journal

1708 of the American Nephrology Nurses' Association. 2006;33(4):449-53, 61.  
1709 PubMed PMID: 17002004.

1710 A411. Song DK, Im YB, Jung JS, Cho J, Suh HW, Kim YH. Central beta-amyloid  
1711 peptide-induced peripheral interleukin-6 responses in mice. Journal of  
1712 neurochemistry. 2001;76(5):1326-35. PubMed PMID: 11238717.

1713 A412. Sorensen B, Nielsen GL, Ebbesen LS, Ingerslev J. Feasibility of LMW  
1714 heparin prophylaxis for management of thrombophilia investigation in  
1715 patients on oral anticoagulation therapy. Thrombosis and haemostasis.  
1716 2001;85(3):563-4. PubMed PMID: 11307834.

1717 A413. Soundy A, Taylor A, Faulkner G, Rowlands A. Psychometric properties of  
1718 the 7-Day Physical Activity Recall questionnaire in individuals with severe  
1719 mental illness. Archives of psychiatric nursing. 2007;21(6):309-16. doi:  
1720 10.1016/j.apnu.2007.03.001. PubMed PMID: 18037441.

1721 A414. Spethmann S, Fischer C, Wagener C, Streichert T, Tschentscher P.  
1722 Nucleic acids from intact epithelial cells as a target for stool-based  
1723 molecular diagnosis of colorectal cancer. International journal of molecular  
1724 medicine. 2004;13(3):451-4. PubMed PMID: 14767578.

1725 A415. Sra J, Narayan G, Krum D, Akhtar M. Registration of 3D computed  
1726 tomographic images with interventional systems: implications for catheter  
1727 ablation of atrial fibrillation. Journal of interventional cardiac  
1728 electrophysiology : an international journal of arrhythmias and pacing.  
1729 2006;16(3):141-8. doi: 10.1007/s10840-006-9030-8. PubMed PMID:  
1730 17139556.

- 1731 A416. Stamatatos TC, Christou G. Azide groups in higher oxidation state  
1732 manganese cluster chemistry: from structural aesthetics to single-  
1733 molecule magnets. *Inorganic chemistry*. 2009;48(8):3308-22. doi:  
1734 10.1021/ic801217j. PubMed PMID: 19364123.
- 1735 A417. Stephan CN, Winburn AP, Christensen AF, Tyrrell AJ. Skeletal  
1736 identification by radiographic comparison: blind tests of a morphoscopic  
1737 method using antemortem chest radiographs. *Journal of forensic*  
1738 *sciences*. 2011;56(2):320-32. doi: 10.1111/j.1556-4029.2010.01673.x.  
1739 PubMed PMID: 21306373.
- 1740 A418. Steudel R, Steudel Y, Wong MW. Complexation of the vulcanization  
1741 accelerator tetramethylthiuram disulfide and related molecules with zinc  
1742 compounds including zinc oxide clusters (Zn<sub>4</sub>O<sub>4</sub>). *Chemistry*.  
1743 2008;14(3):919-32. doi: 10.1002/chem.200701089. PubMed PMID:  
1744 17994599.
- 1745 A419. Stevenson JG. Overcoming inertia: achieving more-rapid transformation of  
1746 pharmacy practice. *American journal of health-system pharmacy : AJHP :*  
1747 *official journal of the American Society of Health-System Pharmacists*.  
1748 2011;68(7):604-12. doi: 10.2146/ajhp100640. PubMed PMID: 21411802.
- 1749 A420. Stoddart B, Collyns T, Denton M. Fusidic acid cream for impetigo.  
1750 Problem may be clinically important. *Bmj*. 2002;324(7350):1394. PubMed  
1751 PMID: 12053929.
- 1752 A421. Stone AF, Mendall MA, Kaski JC, Edger TM, Risley P, Poloniecki J, et al.  
1753 Effect of treatment for *Chlamydia pneumoniae* and *Helicobacter pylori* on

1754 markers of inflammation and cardiac events in patients with acute  
1755 coronary syndromes: South Thames Trial of Antibiotics in Myocardial  
1756 Infarction and Unstable Angina (STAMINA). *Circulation*.  
1757 2002;106(10):1219-23. PubMed PMID: 12208796.

1758 A422. Streetman DD, Khanderia U. Diagnosis and treatment of Graves disease.  
1759 *The Annals of pharmacotherapy*. 2003;37(7-8):1100-9. PubMed PMID:  
1760 12841824.

1761 A423. Struyf S, Stoops G, Van Coillie E, Gouwy M, Schutyser E, Lenaerts JP, et  
1762 al. Gene cloning of a new plasma CC chemokine, activating and attracting  
1763 myeloid cells in synergy with other chemoattractants. *Biochemistry*.  
1764 2001;40(39):11715-22. PubMed PMID: 11570872.

1765 A424. Sudrania OP. Kurt Semm: A laparoscopic crusader. *Journal of minimal*  
1766 *access surgery*. 2007;3(3):115. doi: 10.4103/0972-9941.37197. PubMed  
1767 PMID: 19789670; PubMed Central PMCID: PMC2749188.

1768 A425. Sumner JA, Pietrzak RH, Aiello AE, Uddin M, Wildman DE, Galea S, et al.  
1769 Further Support for an Association between the Memory-Related Gene  
1770 WWC1 and Posttraumatic Stress Disorder: Results from the Detroit  
1771 Neighborhood Health Study. *Biological psychiatry*. 2014. doi:  
1772 10.1016/j.biopsych.2014.03.033. PubMed PMID: 24947539.

1773 A426. Suska A, Miguel-Aliaga I, Thor S. Segment-specific generation of  
1774 *Drosophila* Capability neuropeptide neurons by multi-faceted Hox cues.  
1775 *Developmental biology*. 2011;353(1):72-80. doi:

1776 10.1016/j.ydbio.2011.02.015. PubMed PMID: 21354130; PubMed Central  
1777 PMCID: PMC3094758.

1778 A427. Suzuki R, Irisawa A, Bhutani MS, Takagi T, Ikeda T, Hikichi T, et al.  
1779 Ultrathin endoscope-guided transgastric nasocystic irrigation tube  
1780 placement to manage paracolic gutter extension of pancreatic necrosis.  
1781 *Gastrointestinal endoscopy*. 2012;76(2):457-9. doi:  
1782 10.1016/j.gie.2011.07.065. PubMed PMID: 21963068.

1783 A428. Szemenyei H, Hannon M, Long JA. TOPLESS mediates auxin-dependent  
1784 transcriptional repression during Arabidopsis embryogenesis. *Science*.  
1785 2008;319(5868):1384-6. doi: 10.1126/science.1151461. PubMed PMID:  
1786 18258861.

1787 A429. Takayama S, Watanabe M, Kusuyama H, Nagase S, Seki T, Nakazawa T,  
1788 et al. Evaluation of the effects of acupuncture on blood flow in humans  
1789 with ultrasound color Doppler imaging. *Evidence-based complementary  
1790 and alternative medicine : eCAM*. 2012;2012:513638. doi:  
1791 10.1155/2012/513638. PubMed PMID: 22778772; PubMed Central  
1792 PMCID: PMC3388479.

1793 A430. Tang ZQ, Lu Y. Development of GPCR modulation of GABAergic  
1794 transmission in chicken nucleus laminaris neurons. *PloS one*.  
1795 2012;7(4):e35831. doi: 10.1371/journal.pone.0035831. PubMed PMID:  
1796 22545142; PubMed Central PMCID: PMC3335798.

1797 A431. Tarrant RD, Velez-Suberbie ML, Tait AS, Smales CM, Bracewell DG. Host  
1798 cell protein adsorption characteristics during protein A chromatography.



1799 Biotechnology progress. 2012;28(4):1037-44. doi: 10.1002/btpr.1581.  
1800 PubMed PMID: 22736545.

1801 A432. Ter Veld MG, Zawadzka E, Rietjens IM, Murk AJ. Estrogenicity of food-  
1802 associated estrogenic compounds in the fetuses of female transgenic  
1803 mice upon oral and IP maternal exposure. Reproductive toxicology.  
1804 2009;27(2):133-9. doi: 10.1016/j.reprotox.2009.01.010. PubMed PMID:  
1805 19429392.

1806 A433. Terrosu G, Baccarani U, Bresadola V, Sistu MA, Uzzau A, Bresadola F.  
1807 The impact of splenic weight on laparoscopic splenectomy for  
1808 splenomegaly. Surgical endoscopy. 2002;16(1):103-7. doi:  
1809 10.1007/s00464-001-9045-2. PubMed PMID: 11961616.

1810 A434. Thompson BT, Orme JF, Zheng H, Luckett PM, Truwit JD, Willson DF, et  
1811 al. Multicenter validation of a computer-based clinical decision support tool  
1812 for glucose control in adult and pediatric intensive care units. Journal of  
1813 diabetes science and technology. 2008;2(3):357-68. PubMed PMID:  
1814 19885199; PubMed Central PMCID: PMC2769731.

1815 A435. Timmer JR, van der Horst IC, de Luca G, Ottervanger JP, Hoorntje JC, de  
1816 Boer MJ, et al. Comparison of myocardial perfusion after successful  
1817 primary percutaneous coronary intervention in patients with ST-elevation  
1818 myocardial infarction with versus without diabetes mellitus. The American  
1819 journal of cardiology. 2005;95(11):1375-7. doi:  
1820 10.1016/j.amjcard.2005.01.088. PubMed PMID: 15904649.

1821 A436. Tiwari L, Varghese RM, Puliyeel JM. Computerised-hepatitis B-model is  
1822 subject to processing axiom: garbage in, garbage out. Journal of  
1823 hepatology. 2003;39(1):133; author reply 4-5. PubMed PMID: 12821058.

1824 A437. Tondi P, Gerardino L, Santoliquido A, Pola R, Gabrielli M, Papaleo P, et  
1825 al. Treatment of ischemic ulcers of the lower limbs with alprostadil  
1826 (prostaglandin E1). Dermatologic surgery : official publication for American  
1827 Society for Dermatologic Surgery [et al]. 2004;30(8):1113-7. doi:  
1828 10.1111/j.1524-4725.2004.30336.x. PubMed PMID: 15274701.

1829 A438. Torralba AS, Yu K, Shen P, Oefner PJ, Ross J. Experimental test of a  
1830 method for determining causal connectivities of species in reactions.  
1831 Proceedings of the National Academy of Sciences of the United States of  
1832 America. 2003;100(4):1494-8. doi: 10.1073/pnas.262790699. PubMed  
1833 PMID: 12576555; PubMed Central PMCID: PMC149859.

1834 A439. Trathnigg B, Ahmed H. Separation of all oligomers in polyethylene glycols  
1835 and their monomethyl ethers by one-dimensional liquid chromatography.  
1836 Analytical and bioanalytical chemistry. 2011;399(4):1535-45. doi:  
1837 10.1007/s00216-010-3951-x. PubMed PMID: 20614107.

1838 A440. Traub RJ, Olsen PC, McDonald JC. The radiological properties of a novel  
1839 lung tissue substitute. Radiation protection dosimetry. 2006;121(2):202-7.  
1840 doi: 10.1093/rpd/nci371. PubMed PMID: 17142822.

1841 A441. Trost SG, Fees BS, Haar SJ, Murray AD, Crowe LK. Identification and  
1842 validity of accelerometer cut-points for toddlers. Obesity.

1843 2012;20(11):2317-9. doi: 10.1038/oby.2011.364. PubMed PMID:  
1844 22173573.

1845 A442. Trumble S. Teaching the teacher. *The clinical teacher*. 2013;10(4):207-8.  
1846 doi: 10.1111/tct.12091. PubMed PMID: 23834563.

1847 A443. Tsai CN, Chiang WC, Sun CL, Shao KT, Chen SY, Yeh SZ. Trophic size-  
1848 structure of sailfish *Istiophorus platypterus* in eastern Taiwan estimated by  
1849 stable isotope analysis. *Journal of fish biology*. 2014;84(2):354-71. doi:  
1850 10.1111/jfb.12290. PubMed PMID: 24447322.

1851 A444. Tse HF, Wang Q, Yu CM, Ayers GM, Lau CP. Time course of recovery of  
1852 left atrial mechanical dysfunction after cardioversion of spontaneous atrial  
1853 fibrillation with the implantable atrial defibrillator. *The American journal of*  
1854 *cardiology*. 2000;86(9):1023-5, A10. PubMed PMID: 11053721.

1855 A445. Tseng SH, Hayakawa C, Tromberg BJ, Spanier J, Durkin AJ. Quantitative  
1856 spectroscopy of superficial turbid media. *Optics letters*. 2005;30(23):3165-  
1857 7. PubMed PMID: 16350274.

1858 A446. Tsuda E, Minami N, Kobayashi J, Fukaya T, Nozaki H, Noritake K, et al.  
1859 Acute myocardial infarction after Kawasaki disease in an infant: treatment  
1860 with coronary artery bypass grafting. *Pediatrics international : official*  
1861 *journal of the Japan Pediatric Society*. 2009;51(3):421-4. doi:  
1862 10.1111/j.1442-200X.2009.02830.x. PubMed PMID: 19500286.

1863 A447. Tsukada H, Sato K, Fukumoto D, Kakiuchi T. Evaluation of D-isomers of  
1864 O-18F-fluoromethyl, O-18F-fluoroethyl and O-18F-fluoropropyl tyrosine as  
1865 tumour imaging agents in mice. *European journal of nuclear medicine and*

1866 molecular imaging. 2006;33(9):1017-24. doi: 10.1007/s00259-006-0076-8.  
1867 PubMed PMID: 16699766.

1868 A448. Turlure F, Devroe E, Silver PA, Engelman A. Human cell proteins and  
1869 human immunodeficiency virus DNA integration. *Frontiers in bioscience :  
1870 a journal and virtual library.* 2004;9:3187-208. PubMed PMID: 15353349.

1871 A449. Turner CJ, Van Lancker H. A prepatellar Morel-Lavallee lesion in a  
1872 pedestrian vs automobile collision. *The American journal of emergency  
1873 medicine.* 2014;32(1):109 e3-4. doi: 10.1016/j.ajem.2013.08.023. PubMed  
1874 PMID: 24075804.

1875 A450. Uehara A, Sugawara Y, Kurata S, Fujimoto Y, Fukase K, Kusumoto S, et  
1876 al. Chemically synthesized pathogen-associated molecular patterns  
1877 increase the expression of peptidoglycan recognition proteins via toll-like  
1878 receptors, NOD1 and NOD2 in human oral epithelial cells. *Cellular  
1879 microbiology.* 2005;7(5):675-86. doi: 10.1111/j.1462-5822.2004.00500.x.  
1880 PubMed PMID: 15839897.

1881 A451. Umaki TM, Umaki MR, Cobb CM. The psychology of patient compliance: a  
1882 focused review of the literature. *Journal of periodontology.*  
1883 2012;83(4):395-400. doi: 10.1902/jop.2011.110344. PubMed PMID:  
1884 21819248.

1885 A452. van der Heyde Y. Medical responsibility at inquests. *South African medical  
1886 journal = Suid-Afrikaanse tydskrif vir geneeskunde.* 2008;98(11):820, 2.  
1887 PubMed PMID: 19177880.

1888 A453. van Keulen CJ, van den Akker E, van den Berg FG, Pals G, Rauwerda JA.  
1889 The role of type III collagen in family members of patients with abdominal  
1890 aortic aneurysms. *European journal of vascular and endovascular surgery*  
1891 : the official journal of the European Society for Vascular Surgery.  
1892 2000;20(4):379-85. doi: 10.1053/ejvs.2000.1193. PubMed PMID:  
1893 11035971.

1894 A454. Vanchieri C. Texas case raises questions about Hodgkin lymphoma  
1895 treatment in children. *Journal of the National Cancer Institute*.  
1896 2006;98(1):6-8. doi: 10.1093/jnci/djj027. PubMed PMID: 16391363.

1897 A455. Vaughn J, Nayar AC, Srichai MB. Right coronary artery aneurysm with  
1898 aneurysmal dilation and thrombosis of the sinoatrial nodal branch  
1899 mimicking a right atrial mass. *Journal of cardiovascular computed*  
1900 *tomography*. 2014;8(1):85-7. doi: 10.1016/j.jcct.2013.12.015. PubMed  
1901 PMID: 24582048.

1902 A456. Vidyashankar S, Sambaiah K, Srinivasan K. Effect of dietary garlic and  
1903 onion on biliary proteins and lipid peroxidation which influence cholesterol  
1904 nucleation in bile. *Steroids*. 2010;75(3):272-81. doi:  
1905 10.1016/j.steroids.2010.01.003. PubMed PMID: 20079366.

1906 A457. Viola G, Dall'Acqua F, Gabellini N, Moro S, Vedaldi D, Ihmels H.  
1907 Indolo[2,3-b]-quinolizinium bromide: an efficient intercalator with DNA-  
1908 photodamaging properties. *Chembiochem : a European journal of*  
1909 *chemical biology*. 2002;3(6):550-8. doi: 10.1002/1439-

1910 7633(20020603)3:6<550::AID-CBIC550>3.0.CO;2-Z. PubMed PMID:  
1911 12325011.

1912 A458. Vision in Preschoolers Study G. Does assessing eye alignment along with  
1913 refractive error or visual acuity increase sensitivity for detection of  
1914 strabismus in preschool vision screening? Investigative ophthalmology &  
1915 visual science. 2007;48(7):3115-25. doi: 10.1167/iovs.06-1009. PubMed  
1916 PMID: 17591881; PubMed Central PMCID: PMC2140241.

1917 A459. Vlieghe P, Bihel F, Clerc T, Pannecouque C, Witvrouw M, De Clercq E, et  
1918 al. New 3'-azido-3'-deoxythymidin-5'-yl O-(omega-hydroxyalkyl) carbonate  
1919 prodrugs: synthesis and anti-HIV evaluation. Journal of medicinal  
1920 chemistry. 2001;44(5):777-86. PubMed PMID: 11262088.

1921 A460. Vogel CL, Tan-Chiu E. Trastuzumab plus chemotherapy: convincing  
1922 survival benefit or not? Journal of clinical oncology : official journal of the  
1923 American Society of Clinical Oncology. 2005;23(19):4247-50. doi:  
1924 10.1200/JCO.2005.12.903. PubMed PMID: 15911863.

1925 A461. Walker M, Tschanz C. Stories are like water: an academic writing  
1926 workshop for nurses. Creative nursing. 2013;19(2):81-5. PubMed PMID:  
1927 23798245.

1928 A462. Walker RH, Friedman J, Wiener J, Hobler R, Gwinn-Hardy K, Adam A, et  
1929 al. A family with a tau P301L mutation presenting with parkinsonism.  
1930 Parkinsonism & related disorders. 2002;9(2):121-3. PubMed PMID:  
1931 12473404.

1932 A463. Wallace K, Marek CJ, Currie RA, Wright MC. Exocrine pancreas trans-  
1933 differentiation to hepatocytes--a physiological response to elevated  
1934 glucocorticoid in vivo. *The Journal of steroid biochemistry and molecular*  
1935 *biology*. 2009;116(1-2):76-85. doi: 10.1016/j.jsbmb.2009.05.002. PubMed  
1936 PMID: 19446026.

1937 A464. Wanders RJ, Jansen GA, Skjeldal OH. Refsum disease, peroxisomes and  
1938 phytanic acid oxidation: a review. *Journal of neuropathology and*  
1939 *experimental neurology*. 2001;60(11):1021-31. PubMed PMID: 11706932.

1940 A465. Wang C, Kim T, Gao D, Vaglenov A, Kaltenboeck B. Rapid high-yield  
1941 mRNA extraction for reverse-transcription PCR. *Journal of biochemical*  
1942 *and biophysical methods*. 2007;70(3):507-9. doi:  
1943 10.1016/j.jbbm.2006.10.003. PubMed PMID: 17125842; PubMed Central  
1944 PMCID: PMC1864960.

1945 A466. Wang RH, Li C, Deng CX. Liver steatosis and increased ChREBP  
1946 expression in mice carrying a liver specific SIRT1 null mutation under a  
1947 normal feeding condition. *International journal of biological sciences*.  
1948 2010;6(7):682-90. PubMed PMID: 21103071; PubMed Central PMCID:  
1949 PMC2990071.

1950 A467. Wang X, Zheng Y, Shen F, Rao C. Theoretical analysis of tuning coherent  
1951 laser array for several applications. *Journal of the Optical Society of*  
1952 *America A, Optics, image science, and vision*. 2012;29(5):702-10. doi:  
1953 10.1364/JOSAA.29.000702. PubMed PMID: 22561928.

1954 A468. Wang Y, Arsenault G, Riddell N, McCrindle R, McAlees A, Martin JW.  
1955 Perfluorooctane sulfonate (PFOS) precursors can be metabolized  
1956 enantioselectively: principle for a new PFOS source tracking tool.  
1957 Environmental science & technology. 2009;43(21):8283-9. doi:  
1958 10.1021/es902041s. PubMed PMID: 19924957.

1959 A469. Webb JG, Maisano F, Vahanian A, Munt B, Naqvi TZ, Bonan R, et al.  
1960 Percutaneous suture edge-to-edge repair of the mitral valve.  
1961 EuroIntervention : journal of EuroPCR in collaboration with the Working  
1962 Group on Interventional Cardiology of the European Society of Cardiology.  
1963 2009;5(1):86-9. PubMed PMID: 19577987.

1964 A470. Westlake BC, Brennaman MK, Concepcion JJ, Paul JJ, Bettis SE,  
1965 Hampton SD, et al. Concerted electron-proton transfer in the optical  
1966 excitation of hydrogen-bonded dyes. Proceedings of the National  
1967 Academy of Sciences of the United States of America.  
1968 2011;108(21):8554-8. doi: 10.1073/pnas.1104811108. PubMed PMID:  
1969 21555541; PubMed Central PMCID: PMC3102414.

1970 A471. White JR, Palejwala A. Bilateral shoulder fracture, dislocation and  
1971 replacement: a first presentation of epilepsy. BMJ case reports.  
1972 2011;2011. doi: 10.1136/bcr.09.2011.4830. PubMed PMID: 22675040;  
1973 PubMed Central PMCID: PMC3207796.

1974 A472. Whiteaker P, Jimenez M, McIntosh JM, Collins AC, Marks MJ.  
1975 Identification of a novel nicotinic binding site in mouse brain using [(125)I]-  
1976 epibatidine. British journal of pharmacology. 2000;131(4):729-39. doi:



1977 10.1038/sj.bjp.0703616. PubMed PMID: 11030722; PubMed Central  
1978 PMCID: PMC1572375.

1979 A473. Wierman JC. Percolation threshold is not a decreasing function of the  
1980 average coordination number. Physical review E, Statistical, nonlinear,  
1981 and soft matter physics. 2002;66(4 Pt 2):046125. PubMed PMID:  
1982 12443277.

1983 A474. Williams PA, Cosme J, Ward A, Angove HC, Matak Vinkovic D, Jhoti H.  
1984 Crystal structure of human cytochrome P450 2C9 with bound warfarin.  
1985 Nature. 2003;424(6947):464-8. doi: 10.1038/nature01862. PubMed PMID:  
1986 12861225.

1987 A475. Wilschanski M. Patterns of gastrointestinal disease associated with  
1988 mutations of CFTR. Current gastroenterology reports. 2008;10(3):316-23.  
1989 PubMed PMID: 18625144.

1990 A476. Winance M. Pain, disability and rehabilitation practices. A  
1991 phenomenological perspective. Disability and rehabilitation.  
1992 2006;28(18):1109-18. doi: 10.1080/09638280500531800. PubMed PMID:  
1993 16966231.

1994 A477. Wolffenbuttel BH, Klaff LJ, Bhushan R, Fahrback JL, Jiang H, Martin S.  
1995 Initiating insulin therapy in elderly patients with Type 2 diabetes: efficacy  
1996 and safety of lispro mix 25 vs. basal insulin combined with oral glucose-  
1997 lowering agents. Diabetic medicine : a journal of the British Diabetic  
1998 Association. 2009;26(11):1147-55. doi: 10.1111/j.1464-  
1999 5491.2009.02824.x. PubMed PMID: 19929994.

2000 A478. Wu B, Wang X, Zhang JH. Cardiac damage after subarachnoid  
2001 hemorrhage. *Acta neurochirurgica Supplement*. 2011;110(Pt 1):215-8. doi:  
2002 10.1007/978-3-7091-0353-1\_37. PubMed PMID: 21116942.

2003 A479. Wu GS, Korsgren O, Zhang JG, Song ZS, Van Rooijen N, Tibell A. Role of  
2004 macrophages and natural killer cells in the rejection of pig islet xenografts  
2005 in mice. *Transplantation proceedings*. 2000;32(5):1069. PubMed PMID:  
2006 10936361.

2007 A480. Yanagisawa R, Takano H, Inoue K, Ichinose T, Yoshida S, Sadakane K,  
2008 et al. Complementary DNA microarray analysis in acute lung injury  
2009 induced by lipopolysaccharide and diesel exhaust particles. *Experimental*  
2010 *biology and medicine*. 2004;229(10):1081-7. PubMed PMID: 15522845.

2011 A481. Yap EP, Koh VW, Loh JJ, Ng YY, Ooi EE. South-Asian tsunami. *Lancet*.  
2012 2005;365(9463):933. doi: 10.1016/S0140-6736(05)71069-2. PubMed  
2013 PMID: 15766984.

2014 A482. Yaron A, Huang PH, Cheng HJ, Tessier-Lavigne M. Differential  
2015 requirement for Plexin-A3 and -A4 in mediating responses of sensory and  
2016 sympathetic neurons to distinct class 3 Semaphorins. *Neuron*.  
2017 2005;45(4):513-23. doi: 10.1016/j.neuron.2005.01.013. PubMed PMID:  
2018 15721238.

2019 A483. Yokoyama Y, Ebata T, Igami T, Sugawara G, Nagino M. Is the enteral  
2020 replacement of externally drained pancreatic juice valuable after  
2021 pancreatoduodenectomy? *Surgery today*. 2014;44(2):252-9. doi:  
2022 10.1007/s00595-013-0522-8. PubMed PMID: 23494105.

2023 A484. Yoon PW, Scheuner MT, Jorgensen C, Khoury MJ. Developing Family  
2024 Healthware, a family history screening tool to prevent common chronic  
2025 diseases. Preventing chronic disease. 2009;6(1):A33. PubMed PMID:  
2026 19080039; PubMed Central PMCID: PMC2644613.

2027 A485. Yoshida T, Goto S, Kawakatsu M, Urata Y, Li TS. Mitochondrial  
2028 dysfunction, a probable cause of persistent oxidative stress after exposure  
2029 to ionizing radiation. Free radical research. 2012;46(2):147-53. doi:  
2030 10.3109/10715762.2011.645207. PubMed PMID: 22126415.

2031 A486. Yu SH, Su HM, Lin TH, Lee KT, Voon WC, Lai WT, et al. Acute  
2032 cardiogenic pulmonary edema induced by severe hypoglycemia--a rare  
2033 case report. International journal of cardiology. 2013;168(3):e94-5. doi:  
2034 10.1016/j.ijcard.2013.07.122. PubMed PMID: 23920060.

2035 A487. Yu Y, Ramsay JA, Ramsay BA. On-line estimation of dissolved methane  
2036 concentration during methanotrophic fermentations. Biotechnology and  
2037 bioengineering. 2006;95(5):788-93. doi: 10.1002/bit.21050. PubMed  
2038 PMID: 16850500.

2039 A488. Yuan S, Yu X, Asara JM, Heuser JE, Ludtke SJ, Akey CW. The holo-  
2040 apoptosome: activation of procaspase-9 and interactions with caspase-3.  
2041 Structure. 2011;19(8):1084-96. doi: 10.1016/j.str.2011.07.001. PubMed  
2042 PMID: 21827945; PubMed Central PMCID: PMC3155825.

2043 A489. Yuen OY, Choy PY, Chow WK, Wong WT, Kwong FY. Synthesis of 3-  
2044 cyanoindole derivatives mediated by copper(I) iodide using benzyl

2045 cyanide. The Journal of organic chemistry. 2013;78(7):3374-8. doi:  
2046 10.1021/jo3028278. PubMed PMID: 23448701.

2047 A490. Zakzanis KK, Leach L. Evidence for a shrinking span of personal and  
2048 present existence in dementia of the Alzheimer's type. Brain and  
2049 cognition. 2002;49(2):249-53. PubMed PMID: 15259403.

2050 A491. Zaldivar JM, Baraibar J. A biology-based dynamic approach for the  
2051 reconciliation of acute and chronic toxicity tests: application to Daphnia  
2052 magna. Chemosphere. 2011;82(11):1547-55. doi:  
2053 10.1016/j.chemosphere.2010.11.062. PubMed PMID: 21168184.

2054 A492. Zenge MO, Vogt FM, Brauck K, Jokel M, Barkhausen J, Kannengiesser S,  
2055 et al. High-resolution continuously acquired peripheral MR angiography  
2056 featuring partial parallel imaging GRAPPA. Magnetic resonance in  
2057 medicine : official journal of the Society of Magnetic Resonance in  
2058 Medicine / Society of Magnetic Resonance in Medicine. 2006;56(4):859-  
2059 65. doi: 10.1002/mrm.21033. PubMed PMID: 16964615.

2060 A493. Zhang M, Liu N, Tang W. Stereoselective total synthesis of hainanolidol  
2061 and harringtonolide via oxidopyrylium-based [5 + 2] cycloaddition. Journal  
2062 of the American Chemical Society. 2013;135(33):12434-8. doi:  
2063 10.1021/ja406255j. PubMed PMID: 23930656; PubMed Central PMCID:  
2064 PMC3798225.

2065 A494. Zhao Y, Tan YS, Aupperlee MD, Langohr IM, Kirk EL, Troester MA, et al.  
2066 Pubertal high fat diet: effects on mammary cancer development. Breast

2067 cancer research : BCR. 2013;15(5):R100. doi: 10.1186/bcr3561. PubMed  
2068 PMID: 24156623; PubMed Central PMCID: PMC3978633.

2069 A495. Zhou J, Mauerer K, Farina L, Gribben JG. The role of the tumor  
2070 microenvironment in hematological malignancies and implication for  
2071 therapy. *Frontiers in bioscience : a journal and virtual library.*  
2072 2005;10:1581-96. PubMed PMID: 15769648.

2073 496. Zhu F, Liu Q, Fu Y, Shen B. Segmentation of neuronal structures using  
2074 SARSA (lambda)-based boundary amendment with reinforced gradient-  
2075 descent curve shape fitting. *PloS one.* 2014;9(3):e90873. doi:  
2076 10.1371/journal.pone.0090873. PubMed PMID: 24625699; PubMed  
2077 Central PMCID: PMC3953327.

2078 A497. Zhu L, Tee KL, Roccatano D, Sonmez B, Ni Y, Sun ZH, et al. Directed  
2079 evolution of an antitumor drug (arginine deiminase PpADI) for increased  
2080 activity at physiological pH. *ChemBiochem : a European journal of*  
2081 *chemical biology.* 2010;11(5):691-7. doi: 10.1002/cbic.200900717.  
2082 PubMed PMID: 20157910.

2083 A498. Zhuang H, Cunnane ME, Ghesani NV, Mozley PD, Alavi A. Chest tube  
2084 insertion as a potential source of false-positive FDG-positron emission  
2085 tomographic results. *Clinical nuclear medicine.* 2002;27(4):285-6. PubMed  
2086 PMID: 11914670.

2087 A499. Ziogas DE, Katsios C, Roukos DH. From traditional molecular biology to  
2088 network oncology. *Future oncology.* 2011;7(2):155-9. doi:  
2089 10.2217/fon.10.190. PubMed PMID: 21345133.

2090 A500. Zuberi SM, Hanna MG. Ion channels and neurology. Archives of disease  
2091 in childhood. 2001;84(3):277-80. PubMed PMID: 11207185; PubMed  
2092 Central PMCID: PMC1718682.  
2093
