# Supplementary material for: Reproducible Research Practices and Transparency across the Biomedical Literature
Source: PubMed Central journal article supplement (PMC4699702; doi:10.1371/journal.pbio.1002333), 2016-01-04
Supplement: pbio.1002333.s004.pdf [file pbio.1002333.s004.pdf]

1 The inability to replicate published research has been an ongoing concern in the  
2 scientific community [1]. There is disconcerting evidence from basic molecular  
3 and animal modeling research that a portion of published articles lack  
4 reproducibility [2], which could potentially be related to the increase in lack of  
5 efficacy of clinical trials [3, 4]. It has been suggested that the lack of transparency  
6 of the data is linked to the inability to replicate findings [5]. Although previous  
7 publications have reported on the lack of reproducibility and transparency in  
8 published data, a detailed identification of their predictive indicators has not been  
9 developed.

10

11 Aims: The overall goal is to evaluate the trend in reproducibility and transparency  
12 in a random sample of published biomedical journal articles. Additionally, the  
13 project aims to identify predictors for reproducibility and transparency through  
14 study characteristics. The plan is to derive empirical data on indicators of  
15 transparency and reproducibility that have been proposed in the Lancet series on  
16 increasing value and reducing waste in research by Ioannidis et al.<sup>1</sup>

17

18 Objective1: Measure a sample of 500 biomedical journal articles, chosen  
19 randomly based on Pubmed Identification (PMID) numbers spanning from  
20 PMID # 10,000,000 to PMID # 25,000,000. The random sample will  
21 include English language articles published between 2000 and 2014.

22

23 *Methodology overview:* PMID numbers, ranging from 10,000,000 to  
24 25,000,000 were inputted into OpenEpi (version 3.02) random number  
25 generator to select a random sample of 750 PMID numbers (S1 Table).  
26 Beginning from the first number generated (number 1 in column 1, row 1,  
27 S1 Table), numbers were verified for eligibility in sequence until 500  
28 eligible PMID numbers were chosen (S2 Table). Of the original 750  
29 numbers, 742 were checked, with 242 being ineligible (54 unfound, 100  
30 before year 2000, 35 not in English, and 53 not in English and before year  
31 2000). The selected article distribution of PMID numbers (by year) was  
32 compared to the overall distribution of PMID numbers by year for English  
33 articles. The sample was found to be representative of the overall  
34 distribution,  $\chi^2$  (df=14),  $p>0.05$ . The sample was independently  
35 characterized and cross-compared by two investigators (SAI and JDW)  
36 into 7 study characteristic categories (S3 Table): 1. no research (items  
37 with no data such as editorials, commentaries, news, comments and non-  
38 systematic expert reviews, 2. models/modeling or software or script or  
39 methods without empirical data (other than simulations), 3. case report or  
40 series (humans only, with or without review of the literature) 4. randomized  
41 clinical trials (humans only) 5. systematic reviews and/or meta-analyses  
42 (humans only) 6. cost effectiveness or decision analysis (humans only),  
43 and 7. other (empirical data that includes uncontrolled study (human),  
44 controlled non-randomized study (human) or basic science studies). A  
45 third reviewer (JPAI) reassessed articles with arbitration discrepancies.

46           The sample was found to be primarily composed of articles with  
47           empirical data (70%), with the majority of those articles consisting of  
48           uncontrolled or controlled non-randomized human studies or basic science  
49           research.

50           InCites Essential Science Indicators was used to determine the  
51           field of study. Briefly, the journal for each index paper was first selected in  
52           InCites Essential Science Indicators. Then utilizing the documents tab, the  
53           Highly Cited Papers for each journal were examined. Data extracted were  
54           as follows, for articles with one field listed under the Research Fields for  
55           each of the Highly Cited Papers, the type of field was recorded. If an  
56           article had more than one research field, we would look at the first five  
57           cited journals cited by the index article. The journal names for these  
58           articles were then selected in InCites Essential Science Indicators. If the  
59           majority of the journals listed the same field of study, this field of study  
60           was used for the index paper. If there was no majority field of study, a field  
61           of study was selected based on the best judgment of the reviewers (JPAI,  
62           SAI & JDW). If the journal was not found on InCites Essential Science  
63           Indicators or the journal had no results when selecting the documents tab,  
64           the journal was then selected in InCites Journal Citation Reports. The first  
65           category listed on the Journal Profile page was selected in order to find  
66           the highest cited journal in that category. The highest cited journal was  
67           then selected in InCites Essential Science Indicators to determine the  
68           field listed under the Research Fields for each of the Highly Cited Papers.

69 If the journal could not be located on InCites Journal Citation Reports, a  
70 field of study was selected based on the best judgment of the reviewers  
71 (JPAI, SAI & JDW). Publications in research fields not directly related to  
72 biomedical research (Chemistry, Physics, Computer Science, Economics  
73 & Business, Engineering, Geosciences, Material Science, Mathematics,  
74 Physics, and Space Science) were further excluded from analysis. For this  
75 sample, a total of 59 articles were excluded due to field of study (S4  
76 Table).

77 InCites Journal Citation Reports was used to determine 2013  
78 journal impact factor. No information was recorded for journals without an  
79 impact factor for 2013.

80 Availability of free access in PubMed Central was based on  
81 assignment of a PC MID (yes/no). Study and individual researcher funding  
82 will also be assessed (0=no mention, 1=no funding, 2=public, 3=private  
83 industry, 4=other, 5=combination of 2&3; 6=combination of 2&4;  
84 7=combination of 3&4, 8=combination of 2-4). All of the studies with public  
85 funding were then examined to determine whether they had NIH (or any of  
86 the 27 separate NIH institutes or centers) funding (1=yes, 0=no), NSF  
87 funding (1=yes, 0=no), or Other public funding (1=yes, 0=no) Individual  
88 investigator funding will be excluded from this assessment if listed under  
89 possible conflicts of interest. Field of study will also be determined for  
90 each article utilizing InCites Essential Science Indicators as described in  
91 Objective 1 methodology.

92                   Based on our initial article characteristic classification, publications  
93 with data and analyses (classification categories 4-7, S3 Table), will be  
94 assessed for publically available full protocols and datasets, conflict of  
95 interests, and patterns of reproducibility. For the items that do not include  
96 data and analyses, categories 1-3, only statements of conflict will be  
97 investigated, since protocols, datasets, and reproducibility are not  
98 relevant.

- 99           1. To assess the proportion of publications that have publically available  
100           protocols, we will review the methods sections for direct protocol listing  
101           or reference to the source for available protocol. For the studies that  
102           have publically available protocols, we shall also report whether or not  
103           the available protocols cover all or part of the presented analyses.  
104           Data extracted: 0=no protocols, 1=partial coverage, 2=full coverage
- 105           2. To identify the proportion of publications that have publically available  
106           datasets, chosen manuscripts will be examined for access to the  
107           datasets that stand behind the analyses presented in the paper. If so,  
108           we shall also record whether the available datasets cover all or part of  
109           the presented analyses. Data extracted: 0=no datasets, 1=partial  
110           coverage, 2=full coverage
- 111           3. To identify reported conflict of interests, the proportion of publications  
112           that state that none of the authors have any conflicts of interest, as  
113           attested by declaration statements and checked by reviewers, will be  
114           identified. We will capture specifically whether each article includes a

115 statement on conflict of interest disclosures or not; and, if yes, whether  
116 any conflicts of interest are disclosed. Data extracted: 0=no statement,  
117 1=statement exists, conflicts present, 2=statement exists, no conflicts

118 4. To determine reproducibility patterns, the proportion of publications  
119 whose findings have been replicated will be measured. Web of  
120 Knowledge (v 5.14) will be utilized to identify the number of citations to  
121 each of the index papers of interest as of mid-2014. Furthermore, the  
122 citing papers of each index paper will be examined to identify  
123 systematic reviews and/or meta-analyses and/or studies that claim to  
124 try to replicate findings from the index paper. The citing papers will be  
125 screened at the title level, and those that seem potentially relevant will  
126 also be screened at the abstract, introduction, and possibly full-text  
127 level. Eligible citing papers that are systematic reviews and/or meta-  
128 analyses and/or replications will be downloaded in full text starting with  
129 the one that is published earlier.

130 1. To measure research originality, abstracts from papers  
131 that include data and analyses (classification categories 4-7,  
132 S3 Table) will be examined for clear statements for study  
133 novelty or replication.

134 Data extracted D1: 0=based on the abstract and/or  
135 introduction, the index paper claims that it presents  
136 some novel findings, 1=based on its abstract, the  
137 index paper clearly claims that it is a replication effort

138 trying to validate previous knowledge or based on the  
139 abstract and introduction it is inferred that the index  
140 paper is a replication trying to validate previous  
141 knowledge, 2=based on the abstract and/or  
142 introduction, it claims to be both novel and replicate  
143 previous findings, 3=no statement or unclear  
144 statement in the abstract and/or introduction about  
145 whether the index paper presents a novel finding or  
146 replication OR no distinct abstract and introduction.

147 2. Randomized clinical trials and other empirical data  
148 publications (classification categories 4 and 7, S3 Table) will  
149 further be assessed for articles citing the sample publication  
150 in an English language systematic reviews and/or meta-  
151 analysis (variable D2) and for articles replicating the sample  
152 publication (variable D3).

153 Data extracted D2: 0=no systematic review and/or  
154 meta-analysis has ever cited the index paper, 1=at  
155 least one systematic review and/or meta-analysis has  
156 cited the index paper but none has included any of its  
157 data in quantitative syntheses for any outcome, 1.5 =  
158 at least one systematic review and/or meta-analysis  
159 has cited the index paper but has provided reasons  
160 for not including any of its data for quantitative

161 syntheses for any outcome, 2=at least one systematic  
162 review and/or meta-analysis has cited the index paper  
163 and has included some of its data in quantitative  
164 synthesis for at least one outcome.

165  
166 Data extracted D3: 0=no citing article identified  
167 claiming to be a replication attempt of the index  
168 paper, 1=at least one citing article identified claiming  
169 to be a replication attempt of the index paper.

170  
171 We will not focus on the detailed results of the  
172 systematic reviews, meta-analyses, and replication studies,  
173 since our sample is expected to be underpowered and  
174 inefficient to detect whether specific results are indeed  
175 replicated or not. We focus simply on whether replication  
176 and integration in systematic reviews/meta-analyses of  
177 multiple studies has been considered and performed or not.  
178 Moreover, we anticipate that the majority of index papers will  
179 not have truly new discoveries, but may be operating in a  
180 knowledge space where other past studies may also have  
181 operated. Studies will be considered novel if the abstract  
182 and/or introduction a) claim to investigate new hypotheses,  
183 b) claim to develop and test new methods, c) claim to be the



184 first to investigate something that has not been examined  
185 before, or d) include any statement about new insights. For  
186 index papers, we do not aim to decipher which of these  
187 index studies are indeed proposing entirely new discoveries,  
188 or making claims for some novel findings without these  
189 actually being novel.

## 190 **Reference**

- 191 1. Ioannidis JP. Why most published research findings are false. PLoS  
192 medicine. 2005;2(8):e124. doi: 10.1371/journal.pmed.0020124. PubMed  
193 PMID: 16060722; PubMed Central PMCID: PMC1182327.
- 194 2. Prinz F, Schlange T, Asadullah K. Believe it or not: how much can we rely  
195 on published data on potential drug targets? Nature reviews Drug  
196 discovery. 2011;10(9):712. doi: 10.1038/nrd3439-c1. PubMed PMID:  
197 21892149.
- 198 3. Arrowsmith J. Trial watch: Phase II failures: 2008-2010. Nature reviews  
199 Drug discovery. 2011;10(5):328-9. doi: 10.1038/nrd3439. PubMed PMID:  
200 21532551.
- 201 4. Arrowsmith J. Trial watch: phase III and submission failures: 2007-2010.  
202 Nature reviews Drug discovery. 2011;10(2):87. doi: 10.1038/nrd3375.  
203 PubMed PMID: 21283095.
- 204 5. Landis SC, Amara SG, Asadullah K, Austin CP, Blumenstein R, Bradley  
205 EW, et al. A call for transparent reporting to optimize the predictive value  
206 of preclinical research. Nature. 2012;490(7419):187-91. doi:

207 10.1038/nature11556. PubMed PMID: 23060188; PubMed Central

208 PMCID: PMC3511845.

209

210
