# Supplementary material for: Reproducible Research Practices and Transparency across the Biomedical Literature
Source: PubMed Central journal article supplement (PMC4699702; doi:10.1371/journal.pbio.1002333), 2016-01-04
Supplement: pbio.1002333.s006.pdf [file pbio.1002333.s006.pdf]

|              |               |               |               |               |
|--------------|---------------|---------------|---------------|---------------|
| 1. 17221499  | 151. 13391880 | 301. 10495830 | 451. 22655006 | 601. 21116942 |
| 2. 17467223  | 152. 15794343 | 302. 10899442 | 452. 11887089 | 602. 19114960 |
| 3. 22349201  | 153. 13623619 | 303. 21852490 | 453. 24328800 | 603. 16463060 |
| 4. 20566118  | 154. 24509220 | 304. 19051334 | 454. 13869388 | 604. 24307012 |
| 5. 22402381  | 155. 21777870 | 305. 24629269 | 455. 21151244 | 605. 24625699 |
| 6. 10755285  | 156. 24697300 | 306. 18452984 | 456. 15908535 | 606. 21145441 |
| 7. 19762479  | 157. 19364123 | 307. 23669047 | 457. 22173573 | 607. 18375142 |
| 8. 12140369  | 158. 23132104 | 308. 18917072 | 458. 22432794 | 608. 11716869 |
| 9. 17155884  | 159. 24188923 | 309. 17314962 | 459. 21827945 | 609. 13179795 |
| 10. 12905220 | 160. 24848787 | 310. 24582048 | 460. 12353298 | 610. 11315136 |
| 11. 11570872 | 161. 15420017 | 311. 11443035 | 461. 17170461 | 611. 24156623 |
| 12. 15852141 | 162. 12962197 | 312. 11258324 | 462. 21011460 | 612. 14479408 |
| 13. 10332964 | 163. 16791592 | 313. 15500907 | 463. 20688609 | 613. 16504851 |
| 14. 23048646 | 164. 20386259 | 314. 18756556 | 464. 17142822 | 614. 11324818 |
| 15. 16014249 | 165. 20196510 | 315. 22730448 | 465. 21950181 | 615. 15580405 |
| 16. 10788232 | 166. 11439346 | 316. 18538496 | 466. 11238717 | 616. 18739472 |
| 17. 14345855 | 167. 12797390 | 317. 20237113 | 467. 18154596 | 617. 16501348 |
| 18. 11035971 | 168. 16156622 | 318. 23588459 | 468. 23944022 | 618. 17257304 |
| 19. 20569066 | 169. 20396033 | 319. 13645566 | 469. 21725778 | 619. 21004937 |
| 20. 11207185 | 170. 10370148 | 320. 16850500 | 470. 14948903 | 620. 11914670 |
| 21. 15420359 | 171. 14374101 | 321. 24523190 | 471. 19446026 | 621. 22060480 |
| 22. 15836815 | 172. 15353349 | 322. 24045672 | 472. 22675040 | 622. 22970304 |
| 23. 22996984 | 173. 11784342 | 323. 12550227 | 473. 21575746 | 623. 16500254 |
| 24. 23834563 | 174. 13623500 | 324. 15699395 | 474. 18736495 | 624. 24387237 |
| 25. 11668675 | 175. 10673754 | 325. 11421246 | 475. 21555541 | 625. 16481151 |
| 26. 20079366 | 176. 18151469 | 326. 23169152 | 476. 20159571 | 626. 19439710 |
| 27. 15003652 | 177. 15613125 | 327. 18900919 | 477. 24880519 | 627. 22561928 |
| 28. 15274701 | 178. 19741212 | 328. 23884430 | 478. 24743622 | 628. 18303555 |
| 29. 17906692 | 179. 11519166 | 329. 14239947 | 479. 14732097 | 629. 24373224 |
| 30. 10747129 | 180. 16350274 | 330. 10566157 | 480. 10605859 | 630. 11918964 |
| 31. 13708517 | 181. 19577987 | 331. 10665622 | 481. 12479497 | 631. 11922580 |
| 32. 20950261 | 182. 20843821 | 332. 16413074 | 482. 14098542 | 632. 20729984 |
| 33. 12035268 | 183. 13632085 | 333. 21411802 | 483. 14767578 | 633. 18037441 |
| 34. 13388210 | 184. 24080467 | 334. 12619433 | 484. 19813929 | 634. 21804977 |
| 35. 10806516 | 185. 13294531 | 335. 21139778 | 485. 12734514 | 635. 13861569 |
| 36. 17591881 | 186. 14561913 | 336. 23193508 | 486. 16251691 | 636. 15714066 |
| 37. 15316506 | 187. 12972505 | 337. 12532543 | 487. 11893586 | 637. 20258683 |
| 38. 18625144 | 188. 23569200 | 338. 14931715 | 488. 18047023 | 638. 22931120 |

|              |               |               |               |               |
|--------------|---------------|---------------|---------------|---------------|
| 39. 23359937 | 189. 13273257 | 339. 21963068 | 489. 11731360 | 639. 23494105 |
| 40. 22778772 | 190. 21684540 | 340. 21260701 | 490. 10752330 | 640. 10273412 |
| 41. 11353767 | 191. 24230843 | 341. 11720610 | 491. 22642145 | 641. 14969306 |
| 42. 20633936 | 192. 19355891 | 342. 24422544 | 492. 20147811 | 642. 15247411 |
| 43. 19189154 | 193. 12841824 | 343. 20469608 | 493. 11239814 | 643. 13198290 |
| 44. 15378498 | 194. 23930656 | 344. 17302485 | 494. 17005538 | 644. 13003837 |
| 45. 13984122 | 195. 17949899 | 345. 12502615 | 495. 16114396 | 645. 22307414 |
| 46. 22744898 | 196. 13287034 | 346. 20446052 | 496. 19627661 | 646. 18862864 |
| 47. 15341661 | 197. 15590859 | 347. 24601975 | 497. 15776026 | 647. 20719603 |
| 48. 17541669 | 198. 15823379 | 348. 24609705 | 498. 15034836 | 648. 19710198 |
| 49. 14436100 | 199. 20157910 | 349. 21285628 | 499. 12991433 | 649. 11923688 |
| 50. 13389745 | 200. 21819248 | 350. 22545948 | 500. 21508095 | 650. 19008705 |
| 51. 22856313 | 201. 17513835 | 351. 11615282 | 501. 12300585 | 651. 15255597 |
| 52. 18304443 | 202. 19746724 | 352. 15911863 | 502. 15522845 | 652. 12445353 |
| 53. 19930443 | 203. 15762649 | 353. 15099778 | 503. 14282890 | 653. 20733120 |
| 54. 23920060 | 204. 12872323 | 354. 21889689 | 504. 15839897 | 654. 14536278 |
| 55. 13518638 | 205. 18563731 | 355. 12644405 | 505. 12127510 | 655. 10525554 |
| 56. 20239860 | 206. 24213899 | 356. 17073634 | 506. 24624290 | 656. 24264977 |
| 57. 17774525 | 207. 14869533 | 357. 13288776 | 507. 10012931 | 657. 22304654 |
| 58. 22525923 | 208. 17373341 | 358. 13274043 | 508. 12534561 | 658. 19702778 |
| 59. 21168184 | 209. 20143627 | 359. 11007203 | 509. 22590901 | 659. 14025115 |
| 60. 15346464 | 210. 17393762 | 360. 19665358 | 510. 23413181 | 660. 16748035 |
| 61. 12974476 | 211. 16376652 | 361. 12443277 | 511. 20182785 | 661. 19032132 |
| 62. 19885199 | 212. 12949370 | 362. 22036530 | 512. 16988585 | 662. 22488610 |
| 63. 10936361 | 213. 13698455 | 363. 17215498 | 513. 22572629 | 663. 12208796 |
| 64. 20390172 | 214. 15097753 | 364. 23369776 | 514. 21405595 | 664. 19019474 |
| 65. 18134351 | 215. 14580252 | 365. 18929787 | 515. 11492834 | 665. 15839136 |
| 66. 12415524 | 216. 11756495 | 366. 18784538 | 516. 21504058 | 666. 19500286 |
| 67. 15351035 | 217. 12038089 | 367. 14286955 | 517. 12652399 | 667. 16051745 |
| 68. 20424863 | 218. 23786186 | 368. 11053721 | 518. 24187687 | 668. 22445326 |
| 69. 23529422 | 219. 15259403 | 369. 22204470 | 519. 22176668 | 669. 10219235 |
| 70. 21992636 | 220. 17139556 | 370. 11262088 | 520. 21720135 | 670. 11959368 |
| 71. 10797007 | 221. 12074782 | 371. 11099892 | 521. 10242406 | 671. 14025309 |
| 72. 11116889 | 222. 15262923 | 372. 16552123 | 522. 11022739 | 672. 16089518 |
| 73. 22914732 | 223. 15820264 | 373. 12919547 | 523. 16699766 | 673. 10213525 |
| 74. 20450536 | 224. 20470882 | 374. 16445269 | 524. 15793201 | 674. 11961616 |
| 75. 22624652 | 225. 11030722 | 375. 14545945 | 525. 10619634 | 675. 14000601 |
| 76. 19080039 | 226. 21306373 | 376. 19789670 | 526. 12341484 | 676. 20134924 |

|               |               |               |               |               |
|---------------|---------------|---------------|---------------|---------------|
| 77. 19223875  | 227. 21740615 | 377. 24834474 | 527. 12843471 | 677. 12973082 |
| 78. 17590930  | 228. 16662793 | 378. 15841663 | 528. 18894041 | 678. 19342235 |
| 79. 15534605  | 229. 24936990 | 379. 16210130 | 529. 17004526 | 679. 15721238 |
| 80. 20086276  | 230. 22638695 | 380. 22155803 | 530. 11901867 | 680. 21334298 |
| 81. 13007787  | 231. 14042300 | 381. 13124627 | 531. 23880939 | 681. 13565813 |
| 82. 10041757  | 232. 12488208 | 382. 24508130 | 532. 22098088 | 682. 12747949 |
| 83. 19218230  | 233. 10016385 | 383. 10557870 | 533. 21338070 | 683. 21345132 |
| 84. 19882067  | 234. 17499754 | 384. 19607044 | 534. 23714371 | 684. 19929994 |
| 85. 11126131  | 235. 15089009 | 385. 20814100 | 535. 20292056 | 685. 21345133 |
| 86. 18701402  | 236. 11363099 | 386. 23393528 | 536. 14339400 | 686. 20910396 |
| 87. 19880938  | 237. 14967987 | 387. 11062883 | 537. 10418134 | 687. 20631536 |
| 88. 24485116  | 238. 23245650 | 388. 22251977 | 538. 21787166 | 688. 15872224 |
| 89. 20349343  | 239. 20573849 | 389. 11201420 | 539. 12524609 | 689. 12090368 |
| 90. 20901025  | 240. 18839516 | 390. 19434720 | 540. 18258861 | 690. 15769648 |
| 91. 16964615  | 241. 22078487 | 391. 20388435 | 541. 12119800 | 691. 13798751 |
| 92. 15711980  | 242. 23951529 | 392. 18100492 | 542. 15639101 | 692. 12576555 |
| 93. 14010476  | 243. 22463266 | 393. 23551804 | 543. 12314829 | 693. 13214108 |
| 94. 23798245  | 244. 17890680 | 394. 13797247 | 544. 21311092 | 694. 13227543 |
| 95. 20286732  | 245. 17394056 | 395. 23977311 | 545. 23637984 | 695. 12083064 |
| 96. 23615987  | 246. 20897189 | 396. 18521688 | 546. 16697924 | 696. 19317902 |
| 97. 21942227  | 247. 13279492 | 397. 12556780 | 547. 22334939 | 697. 21388740 |
| 98. 24947539  | 248. 13152648 | 398. 24924783 | 548. 21839589 | 698. 15893508 |
| 99. 22166884  | 249. 13452510 | 399. 20596287 | 549. 20258168 | 699. 12861225 |
| 100. 11947480 | 250. 18752476 | 400. 18484917 | 550. 12475314 | 700. 15897045 |
| 101. 10024412 | 251. 16391363 | 401. 21511401 | 551. 22560018 | 701. 12076871 |
| 102. 13800493 | 252. 12473404 | 402. 24306712 | 552. 14120361 | 702. 11611086 |
| 103. 24859500 | 253. 20688003 | 403. 11095370 | 553. 24243477 | 703. 15904649 |
| 104. 17518445 | 254. 19690666 | 404. 16709823 | 554. 17125842 | 704. 22127457 |
| 105. 12821058 | 255. 12633474 | 405. 16966231 | 555. 14744095 | 705. 14350792 |
| 106. 13716614 | 256. 21453382 | 406. 14608100 | 556. 13466919 | 706. 14039788 |
| 107. 13827809 | 257. 24223392 | 407. 24890534 | 557. 24778596 | 707. 21098937 |
| 108. 16006233 | 258. 22041029 | 408. 18425350 | 558. 11241058 | 708. 19177880 |
| 109. 24941466 | 259. 10137351 | 409. 13962290 | 559. 13499113 | 709. 21395605 |
| 110. 17107901 | 260. 17337370 | 410. 18413068 | 560. 24120809 | 710. 13459374 |
| 111. 15240255 | 261. 14278780 | 411. 15171622 | 561. 23518874 | 711. 12866940 |
| 112. 12325011 | 262. 16714398 | 412. 20317107 | 562. 15430181 | 712. 12015495 |
| 113. 15744710 | 263. 24447322 | 413. 22183776 | 563. 11654612 | 713. 10028717 |
| 114. 17994599 | 264. 16564837 | 414. 11706932 | 564. 17214376 | 714. 20951698 |

|               |               |               |               |               |
|---------------|---------------|---------------|---------------|---------------|
| 115. 21381345 | 265. 13597083 | 415. 24343247 | 565. 23510502 | 715. 21354130 |
| 116. 10298218 | 266. 12455123 | 416. 18115639 | 566. 12066058 | 716. 12010930 |
| 117. 12641861 | 267. 10387752 | 417. 24000752 | 567. 24875287 | 717. 19502191 |
| 118. 11801543 | 268. 18541463 | 418. 12660203 | 568. 15129540 | 718. 17908083 |
| 119. 16537947 | 269. 11732882 | 419. 11907511 | 569. 22601902 | 719. 22126415 |
| 120. 11591566 | 270. 23139447 | 420. 21013892 | 570. 19115167 | 720. 16025326 |
| 121. 23370674 | 271. 10062653 | 421. 14709978 | 571. 15133172 | 721. 24075804 |
| 122. 14943529 | 272. 21152650 | 422. 19613608 | 572. 10283992 | 722. 15551653 |
| 123. 17475505 | 273. 15656611 | 423. 14745864 | 573. 21629745 | 723. 17758986 |
| 124. 18050965 | 274. 11679892 | 424. 16838146 | 574. 10673897 | 724. 17585649 |
| 125. 24664042 | 275. 22224476 | 425. 22996987 | 575. 11730444 | 725. 20344636 |
| 126. 12984467 | 276. 23918719 | 426. 14069977 | 576. 22141682 | 726. 19174516 |
| 127. 20629267 | 277. 16216925 | 427. 21549194 | 577. 18401690 | 727. 20614107 |
| 128. 14291052 | 278. 15425272 | 428. 22736545 | 578. 19611987 | 728. 10273369 |
| 129. 11927861 | 279. 12319418 | 429. 20093909 | 579. 15496969 | 729. 20953679 |
| 130. 13541851 | 280. 19429392 | 430. 20094080 | 580. 13315932 | 730. 24554181 |
| 131. 12781759 | 281. 21103071 | 431. 21577214 | 581. 11307834 | 731. 20922103 |
| 132. 19848053 | 282. 11963753 | 432. 18285063 | 582. 16685302 | 732. 22130044 |
| 133. 10912709 | 283. 15755103 | 433. 12053929 | 583. 22045399 | 733. 12005548 |
| 134. 15240386 | 284. 13032668 | 434. 10603127 | 584. 20971890 | 734. 15623168 |
| 135. 11158473 | 285. 18440207 | 435. 16449812 | 585. 18114016 | 735. 11968902 |
| 136. 14662594 | 286. 11856509 | 436. 22850023 | 586. 23393680 | 736. 24312511 |
| 137. 19834284 | 287. 17336812 | 437. 13141094 | 587. 13822251 | 737. 24197879 |
| 138. 15816788 | 288. 22545142 | 438. 16864888 | 588. 10241404 | 738. 12550665 |
| 139. 22184384 | 289. 10987165 | 439. 15766984 | 589. 11309466 | 739. 24224134 |
| 140. 18187080 | 290. 21960570 | 440. 22718035 | 590. 19249517 | 740. 13932365 |
| 141. 14198753 | 291. 22838749 | 441. 21075107 | 591. 16517111 | 741. 10058109 |
| 142. 12972256 | 292. 21307395 | 442. 17236083 | 592. 23449402 | 742. 20419484 |
| 143. 13630294 | 293. 23763414 | 443. 15191577 | 593. 10491560 | 743. 22562973 |
| 144. 22756720 | 294. 17318980 | 444. 15310796 | 594. 11639812 | 744. 24286993 |
| 145. 19924957 | 295. 18790507 | 445. 12570214 | 595. 10125878 | 745. 16966440 |
| 146. 23267827 | 296. 21440001 | 446. 16460580 | 596. 18098489 | 746. 10755151 |
| 147. 11784578 | 297. 13235647 | 447. 22430022 | 597. 24260308 | 747. 17845991 |
| 148. 15042988 | 298. 23448701 | 448. 10291915 | 598. 14005621 | 748. 15968961 |
| 149. 22937664 | 299. 10072238 | 449. 24030913 | 599. 12266381 | 749. 23885219 |
| 150. 11345261 | 300. 19858589 | 450. 17002004 | 600. 16504852 | 750. 17697393 |
