# Supplementary material for: Reproducible Research Practices and Transparency across the Biomedical Literature
Source: PubMed Central journal article supplement (PMC4699702; doi:10.1371/journal.pbio.1002333), 2016-01-04
Supplement: pbio.1002333.s007.pdf [file pbio.1002333.s007.pdf]

|          |          |          |          |          |
|----------|----------|----------|----------|----------|
| 10665622 | 12949370 | 16850500 | 20086276 | 22545142 |
| 10673754 | 12962197 | 16864888 | 20093909 | 22545948 |
| 10747129 | 12972256 | 16964615 | 20094080 | 22560018 |
| 10755285 | 12972505 | 16966231 | 20147811 | 22561928 |
| 10797007 | 12973082 | 16988585 | 20157910 | 22572629 |
| 10899442 | 12974476 | 17002004 | 20159571 | 22590901 |
| 10912709 | 14561913 | 17004526 | 20182785 | 22624652 |
| 10936361 | 14580252 | 17005538 | 20237113 | 22638695 |
| 10987165 | 14608100 | 17073634 | 20349343 | 22642145 |
| 11007203 | 14662594 | 17107901 | 20386259 | 22655006 |
| 11030722 | 14709978 | 17125842 | 20390172 | 22675040 |
| 11035971 | 14744095 | 17139556 | 20424863 | 22718035 |
| 11053721 | 14745864 | 17142822 | 20469608 | 22730448 |
| 11062883 | 14767578 | 17155884 | 20470882 | 22736545 |
| 11095370 | 14967987 | 17170461 | 20566118 | 22744898 |
| 11099892 | 15003652 | 17214376 | 20569066 | 22778772 |
| 11126131 | 15034836 | 17215498 | 20573849 | 22856313 |
| 11158473 | 15089009 | 17302485 | 20596287 | 22914732 |
| 11201420 | 15099778 | 17314962 | 20614107 | 22931120 |
| 11207185 | 15129540 | 17318980 | 20631536 | 22970304 |
| 11238717 | 15133172 | 17336812 | 20633936 | 22996984 |
| 11239814 | 15171622 | 17337370 | 20688609 | 22996987 |
| 11241058 | 15191577 | 17373341 | 20729984 | 23132104 |
| 11262088 | 15240255 | 17393762 | 20733120 | 23139447 |
| 11307834 | 15240386 | 17394056 | 20814100 | 23169152 |
| 11309466 | 15247411 | 17467223 | 20843821 | 23193508 |
| 11315136 | 15255597 | 17475505 | 20922103 | 23245650 |
| 11324818 | 15259403 | 17499754 | 20950261 | 23267827 |
| 11345261 | 15262923 | 17513835 | 20951698 | 23359937 |
| 11353767 | 15274701 | 17518445 | 20953679 | 23369776 |
| 11421246 | 15310796 | 17541669 | 20971890 | 23370674 |
| 11439346 | 15316506 | 17591881 | 21075107 | 23393528 |
| 11443035 | 15341661 | 17890680 | 21098937 | 23393680 |
| 11570872 | 15351035 | 17906692 | 21103071 | 23448701 |
| 11591566 | 15353349 | 17949899 | 21116942 | 23449402 |
| 11668675 | 15378498 | 17994599 | 21139778 | 23494105 |
| 11706932 | 15496969 | 18037441 | 21145441 | 23510502 |
| 11716869 | 15500907 | 18047023 | 21152650 | 23518874 |
| 11730444 | 15522845 | 18154596 | 21168184 | 23529422 |

|          |          |          |          |          |
|----------|----------|----------|----------|----------|
| 11731360 | 15534605 | 18187080 | 21306373 | 23551804 |
| 11732882 | 15551653 | 18258861 | 21311092 | 23588459 |
| 11756495 | 15580405 | 18303555 | 21334298 | 23615987 |
| 11784342 | 15590859 | 18375142 | 21338070 | 23637984 |
| 11784578 | 15613125 | 18401690 | 21345132 | 23669047 |
| 11801543 | 15623168 | 18413068 | 21345133 | 23714371 |
| 11887089 | 15639101 | 18425350 | 21354130 | 23763414 |
| 11893586 | 15656611 | 18440207 | 21388740 | 23786186 |
| 11907511 | 15699395 | 18452984 | 21395605 | 23798245 |
| 11914670 | 15711980 | 18484917 | 21405595 | 23834563 |
| 11918964 | 15714066 | 18521688 | 21411802 | 23880939 |
| 11922580 | 15721238 | 18538496 | 21440001 | 23884430 |
| 11923688 | 15744710 | 18541463 | 21453382 | 23918719 |
| 11927861 | 15755103 | 18563731 | 21504058 | 23920060 |
| 11959368 | 15762649 | 18625144 | 21508095 | 23930656 |
| 11961616 | 15766984 | 18701402 | 21511401 | 23951529 |
| 11968902 | 15769648 | 18752476 | 21549194 | 23977311 |
| 12005548 | 15793201 | 18756556 | 21555541 | 24000752 |
| 12010930 | 15794343 | 18784538 | 21575746 | 24045672 |
| 12015495 | 15816788 | 18790507 | 21577214 | 24075804 |
| 12035268 | 15820264 | 18929787 | 21629745 | 24080467 |
| 12038089 | 15823379 | 19008705 | 21684540 | 24120809 |
| 12053929 | 15836815 | 19019474 | 21725778 | 24156623 |
| 12066058 | 15839136 | 19032132 | 21740615 | 24187687 |
| 12074782 | 15839897 | 19051334 | 21777870 | 24188923 |
| 12076871 | 15841663 | 19080039 | 21787166 | 24197879 |
| 12083064 | 15852141 | 19114960 | 21804977 | 24223392 |
| 12090368 | 15872224 | 19115167 | 21819248 | 24260308 |
| 12119800 | 15893508 | 19174516 | 21827945 | 24264977 |
| 12127510 | 15897045 | 19177880 | 21839589 | 24306712 |
| 12140369 | 15904649 | 19218230 | 21852490 | 24312511 |
| 12208796 | 15908535 | 19249517 | 21889689 | 24328800 |
| 12325011 | 15911863 | 19317902 | 21960570 | 24343247 |
| 12353298 | 16006233 | 19342235 | 21963068 | 24373224 |
| 12415524 | 16025326 | 19355891 | 21992636 | 24387237 |
| 12443277 | 16051745 | 19364123 | 22036530 | 24422544 |
| 12445353 | 16089518 | 19429392 | 22041029 | 24447322 |
| 12473404 | 16156622 | 19434720 | 22045399 | 24485116 |
| 12475314 | 16210130 | 19439710 | 22060480 | 24508130 |
| 12479497 | 16216925 | 19446026 | 22078487 | 24509220 |
| 12488208 | 16350274 | 19500286 | 22098088 | 24523190 |

|          |          |          |          |          |
|----------|----------|----------|----------|----------|
| 12502615 | 16376652 | 19502191 | 22125952 | 24582048 |
| 12524609 | 16391363 | 19577987 | 22126415 | 24601975 |
| 12534561 | 16413074 | 19627661 | 22127457 | 24609705 |
| 12556780 | 16445269 | 19665358 | 22130044 | 24624290 |
| 12570214 | 16449812 | 19690666 | 22155803 | 24625699 |
| 12576555 | 16460580 | 19710198 | 22173573 | 24629269 |
| 12619433 | 16463060 | 19741212 | 22176668 | 24664042 |
| 12633474 | 16481151 | 19746724 | 22183776 | 24697300 |
| 12641861 | 16500254 | 19762479 | 22184384 | 24743622 |
| 12644405 | 16501348 | 19789670 | 22224476 | 24778596 |
| 12660203 | 16504851 | 19834284 | 22304654 | 24834474 |
| 12734514 | 16504852 | 19848053 | 22334939 | 24848787 |
| 12747949 | 16517111 | 19858589 | 22349201 | 24859500 |
| 12781759 | 16537947 | 19880938 | 22402381 | 24875287 |
| 12797390 | 16685302 | 19882067 | 22430022 | 24880519 |
| 12821058 | 16697924 | 19885199 | 22432794 | 24890534 |
| 12841824 | 16699766 | 19924957 | 22445326 | 24924783 |
| 12861225 | 16709823 | 19929994 | 22463266 | 24936990 |
| 12866940 | 16714398 | 19930443 | 22488610 | 24941466 |
| 12872323 | 16791592 | 20079366 | 22525923 | 24947539 |
