# Supplementary material for: Reproducible Research Practices and Transparency across the Biomedical Literature
Source: PubMed Central journal article supplement (PMC4699702; doi:10.1371/journal.pbio.1002333), 2016-01-04
Supplement: pbio.1002333.s008.pdf [file pbio.1002333.s008.pdf]

| Number | Description                                                                                                                       |
|--------|-----------------------------------------------------------------------------------------------------------------------------------|
| 1      | No research (items with no data such as editorials, commentaries, news, comments and non-systematic expert reviews)               |
| 2      | Models/modeling or software or script or methods without empirical data (other than simulations)                                  |
| 3      | Case report or series (humans only, with or without review of the literature)                                                     |
| 4      | Randomized clinical trials (human only)                                                                                           |
| 5      | Systematic reviews and/or meta-analysis (humans only)                                                                             |
| 6      | Cost effectiveness or decision analysis (humans only)                                                                             |
| 7      | Other (empirical data that includes uncontrolled study (human), controlled non-randomized study (human) or basic science studies) |
