# Supplementary material for: Reproducible Research Practices and Transparency across the Biomedical Literature
Source: PubMed Central journal article supplement (PMC4699702; doi:10.1371/journal.pbio.1002333), 2016-01-04
Supplement: pbio.1002333.s009.pdf [file pbio.1002333.s009.pdf]

|          |          |          |          |
|----------|----------|----------|----------|
| 11062883 | 17005538 | 20729984 | 22931120 |
| 11262088 | 17155884 | 20814100 | 23267827 |
| 11345261 | 17302485 | 21098937 | 23448701 |
| 12127510 | 17314962 | 21152650 | 23510502 |
| 12443277 | 17499754 | 21311092 | 23918719 |
| 12475314 | 17541669 | 21338070 | 23930656 |
| 12576555 | 17994599 | 21405595 | 24080467 |
| 12633474 | 18541463 | 21504058 | 24188923 |
| 15171622 | 18701402 | 21555541 | 24422544 |
| 15656611 | 18756556 | 21740615 | 24508130 |
| 15755103 | 19364123 | 22060480 | 24664042 |
| 15852141 | 20094080 | 22098088 | 24697300 |
| 16089518 | 20390172 | 22463266 | 24834474 |
| 16156622 | 20596287 | 22561928 | 24875287 |
| 16350274 | 20614107 | 22655006 | ---      |
